# Supplementary material for: Discovery of Novel Anti-cryptosporidial Activities From Natural Products by in vitro High-Throughput Phenotypic Screening
Source: PubMed Central journal article supplement (PMC6736568; doi:10.3389/fmicb.2019.01999), 2019-08-29
Supplement: Table_1.pdf [file Table_1.pdf]

**Table S1.** Primary screening at 10  $\mu$ M: Anti-cryptosporidial activity shown as percent inhibition and cytotoxicity as evaluated by host cell Hs18S  $\Delta$ C<sub>T</sub> values between treated and control groups. N/A: not applicable

| #  | Compound name                                  | CAS #                               | Formula       | Mol Wt  | Bioactivity and note                                                                             | Plate # | Inhibition (%) | SEM  | N  | Hs18S $\Delta$ C <sub>T</sub> | SEM  | N | Cytotoxicity (%) |
|----|------------------------------------------------|-------------------------------------|---------------|---------|--------------------------------------------------------------------------------------------------|---------|----------------|------|----|-------------------------------|------|---|------------------|
| 1  | DIGOXIN                                        | 20830-75-5                          | C41H64O14     | 780.96  | cardiac stimulant                                                                                | p1 4-4  | NA             | NA   | NA | 14.32                         | 0.10 | 2 | 100.0            |
| 2  | DIGITOXIN                                      | 71-63-6                             | C41H64O13     | 764.96  | inotropic, cardiotoxic                                                                           | p10 4-1 | NA             | NA   | NA | 13.47                         | 0.04 | 4 | 100.0            |
| 3  | PROSCILLARIDIN                                 | 466-06-8                            | C29H40O9      | 532.64  | cardiotonic                                                                                      | p10 3-8 | NA             | NA   | NA | 13.28                         | 0.08 | 4 | 100.0            |
| 4  | STROPHANTHIDIN                                 | 66-28-4                             | C23H32O6      | 404.51  | cardiotonic                                                                                      | p8 6-6  | NA             | NA   | NA | 11.98                         | 0.27 | 4 | 100.0            |
| 5  | OUABAIN                                        | 11018-89-6, 630-60-4<br>[anhydrous] | C29H44O12     | 584.67  | antiarrhythmic, cardiotoxic, hypertensive, Na/K ATPase inhibitor                                 | p10 9-4 | NA             | NA   | NA | 11.65                         | 0.21 | 4 | 100.0            |
| 6  | DIHYDROCELASTRYL DIACETATE                     | 0                                   | C33H44O6      | 536.72  | chaperone stimulant                                                                              | p3 6-4  | NA             | NA   | NA | 11.29                         | 0.08 | 4 | 100.0            |
| 7  | CONVALLATOXIN                                  | 508-75-8                            | C29H42O10     | 550.65  | cardiotonic                                                                                      | p5 1-8  | NA             | NA   | NA | 10.84                         | 0.08 | 4 | 99.9             |
| 8  | GAMBOGIC ACID                                  | 2752-65-0                           | C38H44O8      | 628.77  | antiinflammatory, cytotoxic, inhibits HeLa cells in vitro;                                       | p4 8-7  | NA             | NA   | NA | 10.02                         | 0.76 | 4 | 99.9             |
| 9  | PERUVOSIDE                                     | 1182-67-2                           | C30H44O9      | 548.68  | cardiotonic                                                                                      | p1 7-3  | NA             | NA   | NA | 10.85                         | 0.13 | 4 | 99.9             |
| 10 | LANATOSIDE C                                   | 17575-22-3                          | C49H76O20     | 985.14  | cardiotonic                                                                                      | p8 2-2  | NA             | NA   | NA | 8.93                          | 0.41 | 4 | 99.8             |
| 11 | GITOXIGENIN DIACETATE                          | 5996-03-2                           | C27H38O7      | 474.60  |                                                                                                  | p4 9-3  | NA             | NA   | NA | 8.90                          | 0.15 | 4 | 99.8             |
| 12 | CANTHARIDIN                                    | 56-25-7                             | C10H12O4      | 196.20  | irritant                                                                                         | p8 10-7 | NA             | NA   | NA | 7.39                          | 0.40 | 4 | 99.4             |
| 13 | 3-OXOURSAN (28-13)OLIDE                        | 0                                   | C30H44O3      | 452.68  |                                                                                                  | p7 1-5  | NA             | NA   | NA | 6.62                          | 0.62 | 4 | 99.0             |
| 14 | ANTHOTHECOL                                    | 10410-83-0                          | C28H32O7      | 480.56  |                                                                                                  | p4 1-5  | NA             | NA   | NA | 6.51                          | 0.62 | 4 | 98.9             |
| 15 | POMIFERIN                                      | 572-03-2                            | C25H24O6      | 420.47  | antioxidant                                                                                      | p3 1-4  | NA             | NA   | NA | 6.42                          | 0.06 | 4 | 98.8             |
| 16 | PODOFILOX                                      | 518-28-5                            | C22H22O8      | 414.42  | antineoplastic, inhibits microtubule assembly, and human DNA topoisomerase II; antimitotic agent | p7 5-1  | NA             | NA   | NA | 5.42                          | 0.10 | 4 | 97.7             |
| 17 | 7-DESACETOXY-6,7-DEHYDROGEDUNIN                | 0                                   | C26H30O5      | 422.53  |                                                                                                  | p4 5-1  | NA             | NA   | NA | 5.31                          | 0.10 | 4 | 97.5             |
| 18 | alpha-MANGOSTIN                                | 6147-11-1                           | C24H26O6      | 410.47  |                                                                                                  | p1 2-6  | NA             | NA   | NA | 4.36                          | 0.14 | 4 | 95.1             |
| 19 | CELASTROL                                      | 34157-83-0                          | C29H38O4      | 450.62  | antineoplastic, NO synthesis inhibitor, chaperone stimulant                                      | p2 5-2  | NA             | NA   | NA | 3.82                          | 0.51 | 4 | 92.9             |
| 20 | 1,4,5,8-TETRAHYDROXY-2,6-DIMETHYLANTHROQUINONE | 19079-10-8                          | C16H12O6      | 300.27  |                                                                                                  | p8 9-2  | NA             | NA   | NA | 3.65                          | 1.94 | 4 | 92.0             |
| 21 | ESTRAGOLE                                      | 140-67-0                            | C10H12O       | 148.21  | insect attractant, skin irritant, carcinogen                                                     | p8 2-4  | 99.57          | 0.10 | 4  | -0.22                         | 0.09 | 4 | -16.6            |
| 22 | CEDRELONE                                      | 1254-85-9                           | C26H30O5      | 422.53  |                                                                                                  | p1 6-1  | 99.50          | 0.02 | 4  | 1.38                          | 0.14 | 4 | 61.7             |
| 23 | DIHYDROGAMBOGIC ACID                           | 0                                   | C38H46O8      | 630.79  |                                                                                                  | p1 4-3  | 97.74          | 0.05 | 4  | -0.60                         | 0.38 | 4 | -52.0            |
| 24 | ABAMECTIN (avermectin B1a shown)               | 71751-41-2                          | C48H72O14     | 873.10  | antiparasitic                                                                                    | p8 3-6  | 97.65          | 0.69 | 4  | 0.59                          | 0.03 | 4 | 33.4             |
| 25 | AVERMECTIN A1a                                 | 0                                   | C49H74O14     | 887.13  | antiparasitic                                                                                    | p5 1-7  | 97.32          | 0.18 | 4  | 0.02                          | 0.06 | 4 | 1.6              |
| 26 | EMETINE DIHYDROCHLORIDE                        | 316-42-7, 483-18-1                  | C29H42Cl2N2O4 | 553.58  | inhibits RNA, DNA and protein synthesis                                                          | p2 1-4  | 97.26          | 0.12 | 4  | 1.41                          | 0.13 | 4 | 62.4             |
| 27 | ISOOSAJIN                                      | 5745-54-0                           | C25H24O5      | 404.47  |                                                                                                  | p5 1-4  | 96.83          | 0.09 | 4  | -0.24                         | 0.04 | 4 | -18.5            |
| 28 | STROPHANTHIDINIC ACID LACTONE ACETATE          | 0                                   | C25H32O7      | 444.53  |                                                                                                  | p3 4-4  | 96.28          | 0.11 | 4  | 2.37                          | 0.08 | 4 | 80.7             |
| 29 | HEXAMETHYLQUERCETAGETIN                        | 1251-84-9                           | C21H22O8      | 402.40  |                                                                                                  | p3 1-7  | 95.76          | 0.38 | 4  | 1.01                          | 1.12 | 4 | 50.3             |
| 30 | DIGOXIGENIN                                    | 1672-46-4                           | C23H34O5      | 390.52  |                                                                                                  | p3 6-5  | 95.61          | 0.22 | 4  | 0.33                          | 0.15 | 4 | 19.2             |
| 31 | TRYPTAMINE                                     | 61-54-1                             | C10H12N2      | 160.22  | psychotropic                                                                                     | p8 7-2  | 95.48          | 0.27 | 4  | -0.43                         | 0.14 | 4 | -34.7            |
| 32 | CAPREOMYCIN SULFATE<br>[capreomycin]           | 1405-37-4, 11003-38-6               | C25H46N14O12S | 766.80  | antibacterial, tuberculostatic                                                                   | p7 2-8  | 95.26          | 0.39 | 4  | 0.30                          | 0.07 | 4 | 18.5             |
| 33 | CRYPTOTANSHINONE                               | 35825-57-1                          | C19H20O3      | 296.37  | inhibits angiogenesis                                                                            | p4 2-8  | 95.26          | 0.39 | 4  | 0.18                          | 0.07 | 4 | 11.9             |
| 34 | ACETYL ISOGAMBOGIC ACID                        | 0                                   | C40H46O9      | 670.81  |                                                                                                  | p3 7-5  | 95.25          | 0.23 | 4  | 1.57                          | 0.05 | 4 | 66.4             |
| 35 | PLUMBAGIN                                      | 481-42-5                            | C11H8O3       | 188.18  | antibacterial, antifungal, tuberculostatic; antifedant (worm)                                    | p5 10-5 | 95.14          | 0.51 | 4  | 1.26                          | 0.09 | 4 | 58.1             |
| 36 | PRISTIMERIN                                    | 1258-84-0                           | C30H40O4      | 464.65  | antineoplastic, antiinflammatory                                                                 | p3 8-5  | 94.70          | 0.31 | 4  | 0.55                          | 0.06 | 4 | 31.6             |
| 37 | ERYTHROMYCIN                                   | 114-07-8                            | C37H67NO13    | 733.95  | antibacterial                                                                                    | p6 2-8  | 94.62          | 0.66 | 4  | 0.62                          | 0.11 | 4 | 35.0             |
| 38 | NOBILETIN                                      | 478-01-3                            | C21H22O8      | 402.40  | matrix metalloproteinase inhibitor; antineoplastic                                               | p5 7-1  | 94.56          | 0.34 | 4  | 0.26                          | 0.06 | 4 | 16.2             |
| 39 | DACTINOMYCIN                                   | 50-76-0                             | C62H86N12O16  | 1255.45 | antineoplastic, intercalating agent                                                              | p6 10-6 | 94.27          | 0.68 | 4  | 1.50                          | 0.04 | 4 | 64.6             |
| 40 | MONENSIN SODIUM (monensin A is shown)          | 22373-78-0, 17090-79-8 (monensin)   | C37H63NaO10   | 690.90  | antibacterial                                                                                    | p10 6-6 | 94.05          | 0.57 | 4  | 0.25                          | 0.09 | 4 | 15.7             |
| 41 | MITOMYCIN                                      | 50-07-7                             | C15H18N4O5    | 334.33  | antineoplastic                                                                                   | p7 9-2  | 93.73          | 0.54 | 4  | 1.34                          | 0.04 | 4 | 60.5             |

|    |                                                 |               |                 |         |                                                                                 |         |       |      |   |       |      |   |       |
|----|-------------------------------------------------|---------------|-----------------|---------|---------------------------------------------------------------------------------|---------|-------|------|---|-------|------|---|-------|
| 42 | SILIBININ                                       | 22888-70-6    | C25H22O10       | 482.45  | hepatoprotective agent, antioxidant                                             | p7 1-2  | 93.53 | 0.62 | 4 | -0.02 | 0.14 | 4 | -1.4  |
| 43 | RESVERATROL                                     | 501-36-0      | C14H12O3        | 228.25  | antifungal, antibacterial                                                       | p4 1-2  | 93.53 | 0.62 | 4 | -0.13 | 0.14 | 4 | -9.6  |
| 44 | DIMETHYL GAMBOGINATE                            | 0             | C40H49ClO8      | 693.28  |                                                                                 | p6 7-1  | 93.45 | 0.17 | 4 | 2.30  | 0.13 | 4 | 79.7  |
| 45 | HAEMATOPORPHYRIN                                | 14459-29-1    | C34H38N4O6      | 598.71  | antidepressant, antineoplastic                                                  | p8 9-4  | 93.06 | 0.57 | 4 | 1.45  | 1.28 | 4 | 63.3  |
| 46 | TOMATINE                                        | 86273-92-9    | C47H79NO21      | 994.15  | antifungal, antibacterial, antiinflammatory agent                               | p9 3-6  | 92.89 | 0.17 | 4 | 0.04  | 0.04 | 4 | 2.7   |
| 47 | DIHYDROCELASTROL                                | 0             | C29H40O4        | 452.64  |                                                                                 | p1 7-1  | 92.50 | 2.01 | 4 | 1.27  | 0.35 | 4 | 58.7  |
| 48 | 3-HYDROXYFLAVONE                                | 577-85-5      | C15H10O3        | 238.25  |                                                                                 | p8 3-8  | 92.36 | 1.08 | 4 | -0.04 | 0.07 | 4 | -2.7  |
| 49 | VALINOMYCIN                                     | 2001-95-8     | C54H90N6O18     | 1111.35 | antibiotic; LD5 (rat, po) 4 mg/kg                                               | p7 4-1  | 92.27 | 0.83 | 4 | -0.13 | 0.06 | 4 | -9.2  |
| 50 | 3alpha-ACETOXYDIHYDRODEOXYGEDUNIN               | 0             | C30H40O7        | 512.65  |                                                                                 | p4 4-1  | 92.27 | 0.83 | 4 | -0.24 | 0.06 | 4 | -18.1 |
| 51 | RUTILANTINONE                                   | 21288-61-9    | C22H20O9        | 428.40  | coccidiostat                                                                    | p9 2-6  | 91.98 | 0.24 | 4 | -0.54 | 0.07 | 4 | -45.2 |
| 52 | BENZYL ISOTHIOCYANATE                           | 622-78-6      | C8H7NS          | 149.22  | antineoplastic, antibacterial, antifungal                                       | p9 1-8  | 91.81 | 0.55 | 4 | 0.57  | 0.09 | 4 | 32.8  |
| 53 | beta-SITOSTEROL                                 | 83-46-5       | C29H50O         | 414.72  |                                                                                 | p8 8-5  | 91.74 | 0.45 | 4 | 0.43  | 0.20 | 4 | 25.8  |
| 54 | URIDINE TRIPHOSPHATE TRISODIUM                  | 19817-92-6    | C9H12N2Na3O15P3 | 550.09  | psychostimulant                                                                 | p8 2-1  | 91.48 | 2.02 | 4 | 0.23  | 0.14 | 4 | 14.5  |
| 55 | DEMETHYLNORBILETIN                              | 2174-59-6     | C20H20O8        | 388.38  |                                                                                 | p1 6-8  | 91.41 | 1.46 | 4 | -0.06 | 0.08 | 4 | -4.6  |
| 56 | PATULIN                                         | 149-29-1      | C7H6O4          | 154.12  | antibacterial                                                                   | p9 10-4 | 91.38 | 0.40 | 4 | 0.81  | 0.10 | 4 | 43.0  |
| 57 | DEOXSAPPANONE B 7,4'-DIMETHYL ETHER             | 0             | C18H18O5        | 314.34  |                                                                                 | p4 8-6  | 91.32 | 0.59 | 4 | 0.62  | 0.05 | 4 | 35.1  |
| 58 | LAPACHOL                                        | 84-79-7       | C15H14O3        | 242.28  | antineoplastic, antifungal                                                      | p8 8-8  | 91.29 | 0.83 | 4 | -0.60 | 0.04 | 4 | -52.0 |
| 59 | DEACETYLGEDUNIN                                 | 0             | C26H32O6        | 440.54  |                                                                                 | p4 10-6 | 91.08 | 0.43 | 4 | 0.23  | 0.06 | 4 | 14.8  |
| 60 | CHRYSIN DIMETHYL ETHER                          | 21392-57-4    | C17H14O4        | 282.30  |                                                                                 | p8 8-6  | 90.28 | 0.34 | 4 | -0.12 | 0.10 | 4 | -8.6  |
| 61 | 3-DEOXY-3beta-HYDROXYMEXICANOLIDE 16-ENOL ETHER | 0             | C28H36O7        | 484.59  |                                                                                 | p4 6-1  | 89.96 | 0.72 | 4 | -0.49 | 0.06 | 4 | -40.1 |
| 62 | 8beta-HYDROXYCARAPIN, 3,8-HEMIACETAL            | 0             | C27H32O8        | 484.55  |                                                                                 | p3 5-7  | 89.65 | 0.47 | 4 | 0.18  | 0.09 | 4 | 11.8  |
| 63 | 5-HYDROXY-2',4',7,8-TETRAMETHOXYFLAVONE         | 123316-61-0   | C19H18O7        | 358.35  |                                                                                 | p6 5-7  | 89.23 | 0.31 | 4 | 0.20  | 0.05 | 4 | 13.2  |
| 64 | DEACETOXY-7-OXOGEDUNIN                          | 0             | C26H30O6        | 438.53  |                                                                                 | p3 8-8  | 88.69 | 1.41 | 4 | 0.39  | 0.09 | 4 | 23.6  |
| 65 | 3,16-DIDEOXYMEXICANOLIDE-3beta-DIOL             | 0             | C27H36O7        | 472.58  |                                                                                 | p6 9-1  | 87.47 | 0.79 | 4 | -0.18 | 0.02 | 4 | -13.4 |
| 66 | DEOXSAPPANONE B 7,3'-DIMETHYL ETHER ACETATE     | 0             | C20H20O6        | 356.38  |                                                                                 | p5 4-4  | 87.42 | 0.76 | 4 | 0.24  | 0.13 | 4 | 15.5  |
| 67 | OBTUSAQUINONE                                   | 21105-15-7    | C16H14O3        | 254.29  |                                                                                 | p4 6-5  | 87.13 | 1.25 | 4 | 0.84  | 0.05 | 4 | 44.3  |
| 68 | DIHYDROTANSHINONE I                             | 0             | C18H14O3        | 278.31  |                                                                                 | p5 7-6  | 87.00 | 0.17 | 4 | 0.00  | 0.09 | 4 | 0.2   |
| 69 | RESERPINE                                       | 50-55-5       | C33H40N2O9      | 608.69  | antihypertensive                                                                | p10 4-3 | 86.95 | 0.91 | 4 | 0.50  | 0.05 | 2 | 29.4  |
| 70 | ASARYLALDEHYDE                                  | 4460-86-0     | C10H12O4        | 196.20  | fly attractant                                                                  | p8 6-5  | 86.65 | 1.11 | 4 | -0.29 | 0.31 | 4 | -22.0 |
| 71 | PACLITAXEL                                      | 33069-62-4    | C47H51NO14      | 853.93  | antineoplastic                                                                  | p10 2-7 | 86.59 | 0.96 | 4 | 0.65  | 0.10 | 4 | 36.1  |
| 72 | CYCLOSPORINE                                    | 59865-13-3    | C62H111N11O12   | 1202.64 | immunosuppressant                                                               | p10 2-6 | 86.52 | 0.40 | 4 | 0.16  | 0.04 | 4 | 10.4  |
| 73 | LOVASTATIN                                      | 75330-75-5    | C24H36O5        | 404.55  | antihyperlipidemic, HMGCoA reductase inhibitor                                  | p2 1-3  | 85.78 | 3.31 | 4 | 0.60  | 0.17 | 4 | 34.1  |
| 74 | 3-HYDROXYTYRAMINE                               | 62-31-7       | C8H11NO2        | 153.18  | dopaminergic                                                                    | p1 9-6  | 85.53 | 0.92 | 4 | 0.76  | 0.23 | 4 | 41.1  |
| 75 | TRYPTOPHAN                                      | 73-22-3 ['L'] | C11H12N2O2      | 204.23  | antidepressant, nutrient; LD5(rat) 1634 mg/kg ip                                | p1 7-6  | 85.53 | 0.92 | 4 | -0.75 | 0.11 | 3 | -68.2 |
| 76 | OCTOPAMINE HYDROCHLORIDE                        | 104-14-3      | C8H12ClNO2      | 189.64  | adrenergic agonist                                                              | p7 5-2  | 85.13 | 0.39 | 4 | -0.21 | 0.03 | 4 | -15.8 |
| 77 | BUSSEIN                                         | 41060-14-4    | C43H54O18       | 858.90  |                                                                                 | p4 5-2  | 85.13 | 0.39 | 4 | -0.33 | 0.03 | 4 | -25.3 |
| 78 | CYCLOVERATRYLENE                                | 0             | C27H30O6        | 450.54  |                                                                                 | p8 1-5  | 83.81 | 2.02 | 4 | -0.03 | 0.07 | 4 | -2.2  |
| 79 | 2,3,4'-TRIHYDROXY-4-METHOXYBENZOPHENONE         | 0             | C14H12O5        | 260.25  |                                                                                 | p5 10-2 | 83.20 | 1.28 | 4 | 0.10  | 0.09 | 4 | 6.4   |
| 80 | 4-NONYLPHENOL                                   | 104-40-5      | C15H24O         | 220.36  | weevil pheromone, shows estrogenic activity                                     | p9 9-8  | 83.12 | 1.61 | 4 | 0.14  | 0.09 | 4 | 9.2   |
| 81 | TANSHINONE IIA                                  | 568-72-9      | C19H18O3        | 294.35  | antineoplastic, bone resorption inhibitor, antiproliferative, apoptosis inducer | p8 4-4  | 82.67 | 2.04 | 4 | 0.08  | 0.10 | 4 | 5.6   |
| 82 | HARMINE                                         | 442-51-3      | C13H12N2O       | 212.25  | antiparkinsonian, CNS stimulant                                                 | p9 4-8  | 82.22 | 1.87 | 4 | 0.49  | 0.07 | 4 | 28.6  |
| 83 | BAICALEIN                                       | 491-67-8      | C15H10O5        | 270.24  | antiviral (HIV)                                                                 | p3 3-3  | 81.26 | 1.15 | 4 | 0.10  | 0.07 | 4 | 6.7   |

|     |                                                   |                                      |                |         |                                                                   |         |       |       |   |       |      |   |       |
|-----|---------------------------------------------------|--------------------------------------|----------------|---------|-------------------------------------------------------------------|---------|-------|-------|---|-------|------|---|-------|
| 84  | TETRANDRINE                                       | 518-34-3                             | C38H42NO6      | 622.77  | analgesic, antineoplastic, antihypertensive, lymphotoxin          | p9 1-7  | 80.44 | 0.57  | 4 | -0.04 | 0.02 | 4 | -2.5  |
| 85  | PICROPODOPHYLLIN                                  | 477-47-4                             | C22H22O8       | 414.42  | Insulin growth factor 1 receptor inhibitor, antineoplastic        | p9 7-4  | 79.38 | 1.02  | 4 | 0.94  | 0.15 | 4 | 47.8  |
| 86  | IVERMECTIN                                        | 70288-86-7                           | C48H74O14      | 875.12  | antiparasitic                                                     | p10 1-8 | 78.97 | 1.16  | 4 | -0.05 | 0.08 | 4 | -3.4  |
| 87  | QUERCETIN                                         | 117-39-5, 6151-25-3(hydrate)         | C15H10O7       | 302.24  | capillary protectant, antioxidant. antineoplastic, anti-HIV       | p7 7-4  | 78.42 | 1.12  | 4 | 0.34  | 0.03 | 4 | 21.1  |
| 88  | TETRAHYDROGAMBOGIC ACID                           | 0                                    | C38H48O8       | 632.80  |                                                                   | p9 2-8  | 77.89 | 0.85  | 4 | -0.31 | 0.12 | 4 | -23.6 |
| 89  | CHENODIOL                                         | 474-25-9                             | C24H40O4       | 392.58  | anticholithogenic, antilipemic agent                              | p10 5-5 | 77.73 | 5.03  | 4 | 0.27  | 0.09 | 2 | 17.2  |
| 90  | 3beta-HYDROXYDEOXODIHYDRODEOXYGEDUNIN             | 0                                    | C28H38O6       | 470.61  |                                                                   | p4 7-4  | 77.26 | 1.07  | 4 | -0.26 | 0.11 | 4 | -19.7 |
| 91  | DAUNORUBICIN                                      | 20830-81-3                           | C27H29NO10     | 527.53  | antineoplastic                                                    | p10 2-1 | 76.78 | 6.50  | 4 | 0.99  | 0.18 | 4 | 49.5  |
| 92  | SIROLIMUS                                         | 53123-88-9                           | C51H79NO13     | 914.20  | immunosuppressant, antineoplastic; rapamycin                      | p10 4-7 | 76.64 | 1.57  | 4 | 0.94  | 0.09 | 4 | 47.9  |
| 93  | SAFROLE                                           | 94-59-7                              | C10H10O2       | 162.19  | anesthetic (topical) and antiseptic, pediculicide                 | p9 3-8  | 76.16 | 2.02  | 4 | -0.44 | 0.12 | 4 | -35.3 |
| 94  | CAMPOTHECIN                                       | 7689-03-4                            | C20H16N2O4     | 348.36  | antineoplastic                                                    | p5 5-7  | 75.97 | 3.37  | 4 | 1.35  | 0.01 | 4 | 60.8  |
| 95  | TACROLIMUS                                        | 109581-93-3, 104987-11-3 [anhydrous] | C44H69NO12     | 804.04  | immune suppressant, antifungal                                    | p10 3-7 | 75.57 | 1.18  | 4 | 0.16  | 0.03 | 4 | 10.4  |
| 96  | ROTENONE                                          | 83-79-4                              | C23H22O6       | 394.43  | acaricide, ectoparasiticide, antineoplastic, mitochondrial poison | p8 5-5  | 74.65 | 4.19  | 4 | 1.24  | 0.05 | 4 | 57.8  |
| 97  | PIPLARTINE                                        | 20069-09-4                           | C17H19NO5      | 317.34  | anti-asthma, antibronchitis                                       | p5 5-1  | 73.69 | 1.52  | 4 | 0.33  | 0.09 | 4 | 20.5  |
| 98  | PODOPHYLLIN ACETATE                               | 1180-34-3                            | C24H24O9       | 456.45  |                                                                   | p5 3-6  | 72.02 | 0.99  | 4 | 0.58  | 0.16 | 4 | 33.2  |
| 99  | VINBLASTINE SULFATE                               | 143-67-9, 865-21-4                   | C46H60N4O13S   | 909.07  | antineoplastic, spindle poison                                    | p6 2-7  | 71.70 | 1.71  | 4 | 0.81  | 0.14 | 4 | 43.0  |
| 100 | 1,3-DIDEACETYL-7-DEACETOXY-7-OXOKHIVORIN          | 0                                    | C26H34O7       | 458.56  |                                                                   | p3 7-4  | 69.64 | 1.76  | 4 | 0.07  | 0.10 | 4 | 4.7   |
| 101 | QUINIC ACID                                       | 77-95-2                              | C7H12O6        | 192.17  |                                                                   | p7 6-8  | 69.36 | 1.31  | 4 | 0.23  | 0.06 | 4 | 14.6  |
| 102 | GLUTATHIONE                                       | 70-18-8                              | C10H17N3O6S    | 307.33  | antioxidant                                                       | p9 5-8  | 68.08 | 1.20  | 4 | -0.40 | 0.05 | 4 | -32.0 |
| 103 | HESPERIDIN                                        | 520-26-3                             | C28H34O15      | 610.57  | capillary protectant                                              | p7 7-8  | 66.25 | 1.79  | 4 | 0.35  | 0.05 | 4 | 21.5  |
| 104 | GRISEOFULVIN                                      | 126-07-8                             | C17H17ClO6     | 352.77  | antifungal, inhibits mitosis in metaphase                         | p10 6-8 | 66.05 | 4.17  | 4 | 0.30  | 0.06 | 4 | 18.7  |
| 105 | DIMETHYLSULFONE                                   | 67-71-0                              | C2H6O2S        | 94.13   | antiinflammatory, antiproliferative, antiparasitic                | p7 8-3  | 65.78 | 2.69  | 4 | 0.90  | 0.10 | 4 | 46.5  |
| 106 | STIGMASTA-4,22-DIEN-3-ONE                         | 20817-72-5                           | C29H46O        | 410.69  |                                                                   | p7 9-8  | 64.69 | 2.24  | 4 | 0.46  | 0.06 | 4 | 27.4  |
| 107 | MUNDULONE                                         | 481-94-7                             | C26H26O6       | 434.49  |                                                                   | p4 10-4 | 61.78 | 2.00  | 4 | 0.22  | 0.06 | 4 | 14.4  |
| 108 | DERRUSTONE                                        | 2204-59-3                            | C18H14O6       | 326.31  |                                                                   | p7 6-7  | 61.29 | 2.74  | 4 | 0.39  | 0.05 | 4 | 23.9  |
| 109 | LARIXINIC ACID                                    | 118-71-8                             | C6H6O3         | 126.11  |                                                                   | p7 8-8  | 59.78 | 3.35  | 4 | 0.20  | 0.11 | 4 | 12.9  |
| 110 | URSOCHOLANIC ACID                                 | 546-18-9                             | C24H40O2       | 360.59  |                                                                   | p9 1-1  | 59.28 | 3.21  | 4 | -0.10 | 0.02 | 4 | -6.9  |
| 111 | DESACETYL (7)KHIVORINIC ACID, METHYL ESTER        | 0                                    | C28H40O10      | 536.63  |                                                                   | p8 10-5 | 58.59 | 1.85  | 4 | 0.00  | 0.51 | 4 | -0.1  |
| 112 | CIMICIFUGOSIDE H1                                 | 163046-73-9                          | C35H52O9       | 616.80  | estrogen                                                          | p6 8-1  | 58.34 | 15.15 | 4 | 1.71  | 1.07 | 4 | 69.4  |
| 113 | ERYTHROSE                                         | 583-50-6                             | C4H8O4         | 120.11  |                                                                   | p7 10-8 | 57.20 | 0.97  | 4 | 0.23  | 0.09 | 4 | 14.6  |
| 114 | 1,2alpha-EPOXYDEACETOXYDIHYDROGEDUNIN             | 0                                    | C26H32O7       | 456.54  |                                                                   | p5 10-1 | 56.48 | 4.23  | 4 | -0.18 | 0.06 | 4 | -12.9 |
| 115 | PAPAVERINE HYDROCHLORIDE                          | 61-25-6, 58-74-2                     | C20H22ClNO4    | 375.86  | muscle relaxant (smooth), cerebral vasodilator                    | p10 5-8 | 56.16 | 1.09  | 4 | 0.57  | 0.08 | 4 | 32.7  |
| 116 | D-(+)-MALTOSE                                     | 69-79-4                              | C12H22O11      | 342.30  | nutrient, sweetener                                               | p9 7-8  | 55.12 | 2.12  | 4 | -0.19 | 0.06 | 4 | -14.3 |
| 117 | RHOIFOLIN                                         | 17306-46-6                           | C27H30O14      | 578.53  |                                                                   | p9 1-6  | 54.61 | 3.06  | 4 | -0.26 | 0.04 | 4 | -20.0 |
| 118 | GARDENIN B                                        | 2798-20-1                            | C19H18O7       | 358.35  |                                                                   | p8 1-1  | 53.61 | 5.56  | 4 | 0.25  | 0.15 | 4 | 16.0  |
| 119 | HERERAGENIN                                       | 465-99-6                             | C30H48O4       | 472.71  |                                                                   | p1 1-7  | 53.42 | 2.88  | 4 | -0.11 | 0.17 | 4 | -7.7  |
| 120 | BLEOMYCIN (bleomycin B2 shown)                    | 9041-93-4, 11056-06-7                | C58H94N20O26S4 | 1615.77 | antineoplastic                                                    | p7 6-3  | 52.96 | 4.42  | 4 | -0.22 | 0.12 | 4 | -16.8 |
| 121 | ISOLIQURITIGENIN                                  | 961-29-5                             | C15H12O4       | 256.26  | aldose reductase inhibitor, antineoplastic, antiinflammatory      | p9 2-7  | 52.92 | 4.21  | 4 | -0.34 | 0.10 | 4 | -26.4 |
| 122 | CANTHAXANTHIN (euglenanone)                       | 514-78-3                             | C40H52O2       | 564.86  |                                                                   | p9 3-7  | 52.72 | 2.15  | 4 | -0.26 | 0.05 | 4 | -19.8 |
| 123 | KHIVORIN                                          | 2524-38-1                            | C32H42O10      | 586.69  |                                                                   | p4 9-6  | 52.35 | 3.04  | 4 | 0.12  | 0.10 | 4 | 8.0   |
| 124 | EVERNNIC ACID                                     | 570-10-5                             | C9H10O4        | 182.18  |                                                                   | p9 8-8  | 52.13 | 4.07  | 4 | -0.34 | 0.06 | 4 | -26.6 |
| 125 | 3-HYDROXY-4-(SUCCIN-2-YL)-CARYOLANE delta-LACTONE | 0                                    | C19H28O4       | 320.43  |                                                                   | p7 7-7  | 51.45 | 0.73  | 4 | 0.49  | 0.04 | 4 | 28.8  |

|     |                                                                   |                          |               |        |                                                                                          |          |       |       |   |       |      |   |        |
|-----|-------------------------------------------------------------------|--------------------------|---------------|--------|------------------------------------------------------------------------------------------|----------|-------|-------|---|-------|------|---|--------|
| 126 | CASANTHRANOL [cascaroside A shown]                                | 8024-48-4                | C21H22O10     | 434.40 | laxative, antineoplastic                                                                 | p10 4-5  | 50.17 | 22.08 | 4 | 0.24  | 0.05 | 2 | 15.4   |
| 127 | BRUCINE                                                           | 4845-99-2, 357-57-3      | C23H26N2O4    | 394.47 | central stimulant                                                                        | p10 9-8  | 49.94 | 5.54  | 4 | -0.11 | 0.04 | 4 | -8.2   |
| 128 | 3,7-DIMETHOXYFLAVONE                                              | 20950-52-1               | C17H14O4      | 282.30 |                                                                                          | p8 9-6   | 49.73 | 2.16  | 4 | -0.21 | 0.13 | 4 | -15.4  |
| 129 | BIXIN                                                             | 39937-23-0               | C25H30O4      | 394.52 |                                                                                          | p7 4-8   | 49.32 | 14.99 | 4 | 0.60  | 0.08 | 4 | 34.2   |
| 130 | 7,8-DIHYDROXYFLAVONE                                              | 38183-03-8               | C15H10O4      | 254.24 | vascular protectant, antihemorrhagic, tyrosine kinase B agonist                          | p4 4-8   | 49.32 | 14.99 | 4 | 0.49  | 0.08 | 4 | 28.8   |
| 131 | ETOPOSIDE                                                         | 33419-42-0               | C29H32O13     | 588.57 | antineoplastic                                                                           | p7 7-3   | 48.52 | 0.42  | 4 | 0.40  | 0.06 | 4 | 24.1   |
| 132 | 18-AMINOABIETA-8,11,13-TRIENE SULFATE                             | 0                        | C20H33NO4S    | 383.55 |                                                                                          | p9 6-7   | 47.65 | 5.55  | 4 | -0.19 | 0.04 | 4 | -13.9  |
| 133 | NARINGENIN                                                        | 480-41-1                 | C15H12O5      | 272.26 | antiulcer, gibberellin antagonist                                                        | p9 6-1   | 47.57 | 4.37  | 4 | -0.23 | 0.12 | 4 | -17.3  |
| 134 | KASUGAMYCIN HYDROCHLORIDE                                         | 19408-46-9, 6980-18-3    | C14H26ClN3O9  | 415.83 | antifungal                                                                               | p4 6-8   | 47.53 | 3.66  | 4 | -0.02 | 0.04 | 4 | -1.2   |
| 135 | SALSOLIDINE                                                       | 493-48-1                 | C12H17NO2     | 207.27 | antihypertensive                                                                         | p1 10-6  | 47.06 | 8.52  | 4 | 0.32  | 0.06 | 4 | 20.0   |
| 136 | BICUCULLINE (+)                                                   | 485-49-4                 | C20H17NO6     | 367.36 | GABAa antagonist                                                                         | p1 8-6   | 47.06 | 8.52  | 4 | -1.43 | 0.95 | 4 | -169.4 |
| 137 | 2-HYDROXY-5 (6)EPOXY-TETRAHYDROCARYOPHYLLENE                      | 0                        | C15H26O2      | 238.37 |                                                                                          | p3 2-8   | 46.23 | 2.96  | 4 | -0.15 | 0.08 | 4 | -10.9  |
| 138 | AVOCATIN A                                                        | 0                        | C38H70O8      | 654.98 | antibacterial, antifungal                                                                | p7 5-6   | 46.03 | 5.16  | 4 | 0.00  | 0.04 | 4 | -0.1   |
| 139 | ENTANDROPHRAGMIN                                                  | 11013-05-1               | C43H56O17     | 844.92 |                                                                                          | p4 5-6   | 46.03 | 5.16  | 4 | -0.12 | 0.04 | 4 | -8.3   |
| 140 | MUPIROGIN                                                         | 12650-69-0               | C26H44O9      | 500.64 | antibacterial, antimycoplasmal, isoleucyl-tRNA synthetase inhibitor                      | p10 4-8  | 45.65 | 1.20  | 4 | 0.09  | 0.08 | 4 | 5.8    |
| 141 | ASTAXANTHIN                                                       | 71772-51-5               | C40H52O4      | 596.86 |                                                                                          | p1 4-1   | 45.11 | 4.28  | 4 | -0.43 | 0.18 | 4 | -34.8  |
| 142 | DEGUELIN (-)                                                      | 522-17-8                 | C23H22O6      | 394.43 | antineoplastic, antiviral, insecticide                                                   | p3 5-5   | 45.04 | 6.26  | 4 | 0.60  | 0.30 | 4 | 34.2   |
| 143 | URIDINE                                                           | 58-96-8                  | C9H12N2O6     | 244.21 |                                                                                          | p5 7-8   | 44.81 | 4.43  | 4 | 0.02  | 0.08 | 4 | 1.4    |
| 144 | DEOXYADENOSINE                                                    | 16373-93-6               | C10H13N5O3    | 251.25 |                                                                                          | p9 6-8   | 44.55 | 6.78  | 4 | -0.35 | 0.10 | 4 | -27.3  |
| 145 | 4'-METHOXYFLAVONE                                                 | 4143-74-2                | C16H12O3      | 252.27 |                                                                                          | p9 6-3   | 44.41 | 2.12  | 4 | -0.09 | 0.22 | 4 | -6.3   |
| 146 | MYCOPHENOLIC ACID                                                 | 24280-93-1               | C17H20O6      | 320.35 | immune suppressant, antineoplastic, antiviral                                            | p10 8-4  | 44.40 | 4.30  | 4 | 1.03  | 0.08 | 4 | 51.1   |
| 147 | PIMPINELLIN                                                       | 131-12-4                 | C13H10O5      | 246.22 | GABA receptor antagonist, phototoxin                                                     | p7 7-6   | 43.64 | 4.24  | 4 | 0.21  | 0.09 | 4 | 13.3   |
| 148 | AGELASINE (stereochemistry of diterpene unknown)                  | 0                        | C26H40ClN5    | 458.10 | cytotoxic, antineoplastic                                                                | p7 6-6   | 43.55 | 7.01  | 4 | 0.27  | 0.02 | 4 | 16.8   |
| 149 | SINENSETIN                                                        | 2306-27-6                | C20H20O7      | 372.38 |                                                                                          | p3 9-6   | 42.77 | 3.36  | 4 | 0.39  | 0.05 | 4 | 23.6   |
| 150 | APRAMYCIN SULFATE                                                 | 65710-07-8               | C21H41N5O11   | 539.59 | antibacterial; LD5(iv) 28mg/kg(mouse)                                                    | p10 6-7  | 42.68 | 7.42  | 4 | -0.04 | 0.09 | 4 | -3.1   |
| 151 | COTININE                                                          | 486-56-6, 5695-98-       | C10H12N2O     | 176.22 | antidepressant                                                                           | P2 9-8   | 42.64 | 5.41  | 4 | 0.41  | 0.09 | 4 | 24.7   |
| 152 | CHOLIC ACID, METHYL ESTER                                         | 1448-36-8                | C25H42O5      | 422.61 |                                                                                          | p1 1-5   | 42.06 | 2.30  | 4 | -0.11 | 0.06 | 3 | -7.7   |
| 153 | LUPEOL                                                            | 545-47-1                 | C30H50O       | 426.73 | antineoplastic                                                                           | p5 6-8   | 41.81 | 7.76  | 4 | 0.05  | 0.04 | 4 | 3.4    |
| 154 | BATYL ALCOHOL                                                     | 544-62-7                 | C21H44O3      | 344.58 |                                                                                          | p9 1-5   | 41.32 | 1.54  | 4 | -0.57 | 0.09 | 4 | -48.0  |
| 155 | MITRAPHYLLINE                                                     | 509-80-8                 | C21H24N2O4    | 368.44 | antineoplastic                                                                           | p5 9-8   | 41.31 | 4.01  | 4 | 0.17  | 0.16 | 4 | 11.1   |
| 156 | CARNOSINE                                                         | 305-84-0                 | C9H14N4O3     | 226.24 |                                                                                          | p4 8-8   | 41.12 | 2.69  | 4 | 0.08  | 0.13 | 4 | 5.5    |
| 157 | SISOMICIN SULFATE                                                 | 53179-09-2, 32385-11-8   | C19H39N5O11S  | 545.61 | antibacterial, binds to ribosomes                                                        | p10 5-3  | 41.06 | 26.87 | 4 | -0.11 | 0.09 | 2 | -7.8   |
| 158 | BOVINOCIDIN                                                       | 504-88-1                 | C3H5NO4       | 119.08 | antineoplastic                                                                           | p9 4-7   | 41.04 | 3.08  | 4 | -0.32 | 0.04 | 4 | -25.1  |
| 159 | 7-DEACETOXY-7-OXOKHIVORIN                                         | 15004-51-0               | C30H38O9      | 542.63 |                                                                                          | p3 9-8   | 40.16 | 1.36  | 4 | 0.21  | 0.06 | 4 | 13.5   |
| 160 | 6-HYDROXYFLAVONE                                                  | 6665-83-4                | C15H10O3      | 238.25 |                                                                                          | p8 5-2   | 39.99 | 5.24  | 4 | 0.08  | 0.04 | 4 | 5.6    |
| 161 | CRUSTECDYSONE                                                     | 5289-74-7                | C27H44O7      | 480.65 | insect molting hormone                                                                   | p9 5-7   | 39.83 | 0.40  | 4 | -0.15 | 0.03 | 4 | -10.6  |
| 162 | 6,7,2',3',4'-PENTAMETHOXYISOFLAVONE                               | 33978-66-4               | C20H20O7      | 372.38 |                                                                                          | p2 6-4   | 39.55 | 3.29  | 4 | -0.38 | 0.31 | 4 | -30.1  |
| 163 | DAIDZEIN                                                          | 486-66-8                 | C15H10O4      | 254.24 | phytoestrogen                                                                            | p5 7-7   | 39.20 | 4.26  | 4 | 0.01  | 0.18 | 4 | 0.7    |
| 164 | PHENETHYLAMINE HYDROCHLORIDE                                      | 156-28-5, 64-04-0 (base) | C8H12ClN      | 157.64 | CNS stimulant                                                                            | p8 10-2  | 39.04 | 2.69  | 4 | 2.99  | 2.02 | 4 | 87.4   |
| 165 | 2,3-DIHYDROXY-4-METHOXY-4'-ETHOXYBENZOPHENONE                     | 0                        | C16H16O5      | 288.30 |                                                                                          | p9 3-4   | 38.96 | 3.86  | 4 | -0.12 | 0.07 | 4 | -8.6   |
| 166 | L-DEOXYALLIIN                                                     | 21593-77-1               | C6H11NO2S     | 161.22 | antineoplastic                                                                           | p9 2-5   | 38.80 | 7.86  | 4 | -0.29 | 0.13 | 4 | -21.9  |
| 167 | ANDROGRAPHOLIDE                                                   | 5508-58-7                | C20H30O5      | 350.46 | antineoplastic                                                                           | p5 4-5   | 38.80 | 1.92  | 4 | 0.08  | 0.02 | 4 | 5.3    |
| 168 | ACARBOSE                                                          | 56180-94-0               | C25H43NO18    | 645.62 | alpha-glucosidase & saccharase inhibitor, antidiabetes, antihyperlipidaemia, antiobesity | p10 5-7  | 37.83 | 2.12  | 4 | 0.39  | 0.04 | 4 | 23.6   |
| 169 | HUPERZINE A                                                       | 102518-79-6              | C15H18N2O     | 242.32 | anticholinesterase, cognition enhancer                                                   | p3 4-8   | 37.59 | 7.61  | 4 | 0.19  | 0.15 | 4 | 12.4   |
| 170 | TUBOCURARINE CHLORIDE [anhydrous], 41354-45-4 [replaced], 57-95-4 | 6989-98-6, 57-94-3       | C37H42Cl2N2O6 | 681.66 | muscle relaxant (skeletal)                                                               | p10 10-8 | 37.53 | 2.58  | 4 | -0.29 | 0.13 | 4 | -22.2  |
| 171 | GINKGOLIDE A                                                      | 15291-75-5               | C20H24O11     | 440.41 | antibacterial                                                                            | p8 2-8   | 37.48 | 9.03  | 4 | 0.10  | 0.14 | 4 | 6.6    |

|     |                                      |                                          |                 |         |                                                                        |          |       |       |   |       |      |   |       |
|-----|--------------------------------------|------------------------------------------|-----------------|---------|------------------------------------------------------------------------|----------|-------|-------|---|-------|------|---|-------|
| 172 | ORSELLINIC ACID                      | 480-64-8                                 | C8H8O4          | 168.15  |                                                                        | p3 1-1   | 37.47 | 3.49  | 4 | -0.25 | 0.09 | 4 | -19.3 |
| 173 | ROSMARINIC ACID                      | 537-15-5                                 | C18H16O8        | 360.32  | antiinflammatory, antithrombotic, antiplatelet, cytostatic, antiviral  | p3 1-5   | 37.27 | 1.47  | 4 | -0.04 | 0.23 | 4 | -3.1  |
| 174 | SALICIN                              | 138-52-3                                 | C13H18O7        | 286.28  | analgesic, antipyretic                                                 | p10 5-6  | 37.08 | 2.97  | 4 | 0.58  | 0.15 | 4 | 32.9  |
| 175 | BETULIN                              | 473-98-3                                 | C30H50O2        | 442.73  |                                                                        | p8 9-8   | 36.86 | 6.79  | 4 | -0.49 | 0.06 | 4 | -40.4 |
| 176 | UTILIN                               | 31218-22-1                               | C41H52O17       | 816.86  |                                                                        | p3 10-8  | 36.84 | 1.74  | 4 | 0.06  | 0.09 | 4 | 4.2   |
| 177 | ALEURETIC ACID                       | 533-87-9                                 | C16H32O5        | 304.43  |                                                                        | p3 1-6   | 36.82 | 6.74  | 4 | 0.24  | 0.05 | 4 | 15.2  |
| 178 | NICOTINE BITARTRATE                  | 65-31-6                                  | C18H26N2O12     | 462.41  | nicotinyl acetylcholine receptor agonist, ectoparasiticide             | p10 7-8  | 36.71 | 2.16  | 4 | -0.52 | 0.11 | 4 | -43.3 |
| 179 | CYTIDINE                             | 65-46-3                                  | C9H13N3O5       | 243.22  |                                                                        | p3 1-8   | 36.68 | 3.67  | 4 | -0.53 | 0.34 | 4 | -44.6 |
| 180 | DEOXYPEGANINE HYDROCHLORIDE          | 61939-05-7                               | C11H13ClN2      | 208.69  | acetylcholinesterase inhibitor, antiParkinsonism                       | p5 6-5   | 36.29 | 9.69  | 4 | -0.06 | 0.12 | 4 | -4.6  |
| 181 | HYOSCYAMINE                          | 101-31-5                                 | C17H23NO3       | 289.38  | anticholinergic, analgesic                                             | p10 5-2  | 36.17 | 29.26 | 4 | -0.12 | 0.01 | 2 | -8.9  |
| 182 | BERGENIN                             | 477-90-7                                 | C14H16O9        | 328.28  | hepatoprotectant                                                       | P2 9-6   | 36.01 | 9.98  | 4 | 0.38  | 0.18 | 4 | 23.1  |
| 183 | GITOXIN                              | 4562-36-1                                | C41H64O14       | 780.96  | cardiotonic                                                            | p1 3-5   | 35.41 | 4.02  | 2 | 0.08  | 0.04 | 2 | 5.4   |
| 184 | NYSTATIN                             | 114-90-9                                 | C47H75NO17      | 926.12  | antifungal, binds to membrane sterols                                  | p10 4-4  | 34.97 | 20.87 | 4 | 1.05  | 0.58 | 4 | 51.7  |
| 185 | COLISTIN SULFATE                     | 1264-72-8                                | C52H102N16O21S2 | 1351.62 | antibacterial                                                          | p10 10-7 | 33.43 | 13.56 | 4 | 0.01  | 0.05 | 4 | 0.4   |
| 186 | DIHYDROGEDUNIN                       | 0                                        | C28H36O7        | 484.59  |                                                                        | p3 7-8   | 33.28 | 4.27  | 4 | -0.24 | 0.04 | 4 | -17.9 |
| 187 | RETUSIN                              | 1245-15-4                                | C19H18O7        | 358.35  |                                                                        | p9 10-5  | 33.24 | 4.57  | 4 | 0.27  | 0.06 | 4 | 17.0  |
| 188 | BETULINIC ACID                       | 472-15-1                                 | C29H46O3        | 442.69  | antineoplastic                                                         | p9 5-6   | 32.95 | 4.45  | 4 | -0.23 | 0.10 | 4 | -17.4 |
| 189 | DALBERGIONE                          | 0                                        | C15H12O2        | 224.26  |                                                                        | p5 9-3   | 32.77 | 5.71  | 4 | 0.33  | 0.07 | 4 | 20.4  |
| 190 | GIBBERELLIC ACID                     | 77-06-5                                  | C19H22O6        | 346.38  |                                                                        | p3 5-8   | 32.70 | 3.99  | 4 | 0.09  | 0.13 | 4 | 5.9   |
| 191 | MORIN                                | 480-16-0                                 | C15H10O7        | 302.24  | P45 and ATPase inhibitor                                               | p4 7-8   | 32.34 | 4.90  | 4 | -0.21 | 0.04 | 4 | -15.6 |
| 192 | LACTOSE MONOHYDRATE                  | 62-42-3                                  | C12H24O12       | 360.32  | nutrient, pharmaceutical acid                                          | p4 6-6   | 31.71 | 8.06  | 4 | 0.02  | 0.04 | 4 | 1.4   |
| 193 | MEXICANOLIDE                         | 1915-67-9                                | C27H32O7        | 468.55  |                                                                        | p3 6-7   | 31.47 | 8.07  | 4 | -0.17 | 0.05 | 4 | -12.3 |
| 194 | MEPARTRICIN                          | 11121-32-7                               | C60H88N2O19     | 1141.37 | antifungal, antiprotozoal                                              | p7 2-1   | 31.44 | 5.64  | 4 | -0.51 | 0.08 | 4 | -42.4 |
| 195 | CARAPIN-8(9)-ENE                     | 0                                        | C27H30O7        | 466.54  |                                                                        | p4 2-1   | 31.44 | 5.64  | 4 | -0.62 | 0.08 | 4 | -54.0 |
| 196 | LARIXOL                              | 0                                        | C20H34O2        | 306.49  |                                                                        | p2 5-8   | 31.41 | 4.95  | 4 | 0.03  | 0.12 | 5 | 2.2   |
| 197 | DIHYDROGEDUNIC ACID, METHYL ESTER    | 0                                        | C26H36O8        | 476.57  |                                                                        | p4 6-4   | 31.36 | 5.53  | 4 | -0.20 | 0.12 | 4 | -15.2 |
| 198 | SPAGLUMIC ACID                       | 4910-46-7                                | C11H16N2O8      | 304.26  | neurotransmitter; mGluR3 receptors                                     | p5 10-8  | 31.28 | 6.91  | 4 | 0.18  | 0.24 | 4 | 11.9  |
| 199 | ACTINONIN                            | 13434-13-4                               | C19H35N3O5      | 385.51  | antibacterial                                                          | p5 4-8   | 31.27 | 4.56  | 4 | -0.06 | 0.04 | 4 | -4.6  |
| 200 | 3-METHYLORSELLINIC ACID              | 4707-46-4                                | C9H10O4         | 182.18  |                                                                        | p4 6-7   | 30.83 | 3.87  | 4 | 0.05  | 0.03 | 4 | 3.6   |
| 201 | CARAPIN                              | 3463-88-5                                | C27H32O7        | 468.55  |                                                                        | p3 6-8   | 30.71 | 8.06  | 4 | -0.07 | 0.10 | 4 | -5.2  |
| 202 | DALBERGIONE, 4-METHOXY-4'-HYDROXY-0  | 0                                        | C16H14O4        | 270.29  |                                                                        | p5 4-2   | 30.34 | 5.31  | 4 | 0.09  | 0.07 | 4 | 6.1   |
| 203 | PIPERONYLIC ACID                     | 94-53-1                                  | C8H6O4          | 166.13  |                                                                        | p3 2-7   | 30.30 | 3.46  | 4 | -0.04 | 0.10 | 4 | -3.1  |
| 204 | PACHYRRHIZIN                         | 10091-01-7                               | C19H12O6        | 336.30  | insecticide                                                            | p3 2-1   | 29.77 | 5.27  | 4 | -0.08 | 0.10 | 4 | -6.0  |
| 205 | EPOXY (4,5alpha)-4,5-DIHYDROSANTONIN | 0                                        | C15H18O4        | 262.31  |                                                                        | P2 8-8   | 29.68 | 13.61 | 4 | -0.03 | 0.31 | 4 | -1.8  |
| 206 | PERILLYL ALCOHOL                     | 536-59-4, 18457-55-1                     | C10H16O         | 152.24  | antineoplastic, apoptosis inducer; skin irritant, LD5(rat) 21 mg/kg po | p5 2-5   | 29.51 | 1.43  | 4 | -0.35 | 0.04 | 4 | -27.4 |
| 207 | QUASSIN                              | 76-78-8                                  | C22H28O6        | 388.46  | insecticide, antiamebic                                                | p7 5-8   | 29.35 | 5.75  | 4 | 0.08  | 0.10 | 4 | 5.1   |
| 208 | FERULIC ACID                         | 1135-24-6                                | C10H10O4        | 194.19  | antineoplastic, choleric, food preservative                            | p4 5-8   | 29.35 | 5.75  | 4 | -0.04 | 0.10 | 4 | -2.6  |
| 209 | KANAMYCIN A SULFATE                  | 25389-94-0, 133-92-6 [replaced], 59-01-8 | C18H38N4O15S    | 582.59  | antibacterial                                                          | p10 6-2  | 29.26 | 9.55  | 4 | -0.31 | 0.13 | 4 | -23.9 |
| 210 | EPOXYGEDUNIN                         | 0                                        | C28H34O8        | 498.58  |                                                                        | p5 2-4   | 29.04 | 3.64  | 4 | -0.46 | 0.08 | 4 | -37.3 |
| 211 | STRYCHNINE                           | 57-24-9                                  | C21H22N2O2      | 334.42  | central stimulant                                                      | p10 8-8  | 29.02 | 2.64  | 4 | -0.30 | 0.09 | 4 | -23.5 |
| 212 | PHLORIDZIN                           | 60-81-1                                  | C21H24O10       | 436.42  | induces experimental glucosuria, antifeedant                           | p7 1-7   | 28.85 | 5.29  | 4 | -0.08 | 0.02 | 4 | -5.8  |
| 213 | MENTHONE                             | 14073-97-3                               | C10H18O         | 154.25  |                                                                        | p4 1-7   | 28.85 | 5.29  | 4 | -0.20 | 0.02 | 4 | -14.5 |
| 214 | PUTRESCINE DIHYDROCHLORIDE           | 0                                        | C4H14Cl2N2      | 161.08  | ornithine decarboxylase inhibitor, cell growth factor                  | p9 7-7   | 28.72 | 4.86  | 4 | -0.04 | 0.11 | 4 | -3.0  |
| 215 | DEOXYGEDUNIN                         | 21963-95-1                               | C28H34O6        | 466.58  | neuroprotective, anti-depressant, learning enhancement                 | p2 5-1   | 28.62 | 9.62  | 4 | 0.24  | 0.09 | 4 | 15.4  |
| 216 | 6,4'-DIHYDROXYFLAVONE                | 63046-09-3                               | C15H10O4        | 254.24  | antihemorrhagic                                                        | p9 8-1   | 28.18 | 11.52 | 4 | 0.28  | 0.14 | 4 | 17.9  |
| 217 | ESTRONE                              | 53-16-7                                  | C18H22O2        | 270.37  | estrogen                                                               | p10 9-1  | 28.09 | 4.10  | 4 | -0.24 | 0.05 | 4 | -18.4 |

|     |                                                                                            |                                            |              |         |                                                                                                        |         |       |       |   |       |      |   |       |
|-----|--------------------------------------------------------------------------------------------|--------------------------------------------|--------------|---------|--------------------------------------------------------------------------------------------------------|---------|-------|-------|---|-------|------|---|-------|
| 218 | CADAVERINE TARTRATE                                                                        | 462-94-2(base)                             | C7H16N2O6    | 224.22  |                                                                                                        | p4 9-8  | 27.52 | 5.85  | 4 | -0.06 | 0.05 | 4 | -4.5  |
| 219 | DEOXYKHIVORIN                                                                              | 0                                          | C32H42O9     | 570.69  |                                                                                                        | p1 3-4  | 27.34 | 5.50  | 4 | 0.11  | 0.10 | 4 | 7.7   |
| 220 | 1,7-DIDEACETOXY-1,7-DIOXO-3-DEACETYLKHIVORIN                                               | 0                                          | C26H32O7     | 456.54  |                                                                                                        | p4 8-1  | 26.84 | 3.45  | 4 | -0.10 | 0.04 | 4 | -6.9  |
| 221 | CHOLIC ACID                                                                                | 81-25-4                                    | C24H40O5     | 408.58  |                                                                                                        | p1 1-6  | 26.71 | 2.48  | 4 | -0.40 | 0.03 | 4 | -32.0 |
| 222 | MEVALONIC ACID LACTONE                                                                     | 503-48-0                                   | C6H10O3      | 130.14  |                                                                                                        | p7 10-7 | 26.69 | 3.56  | 4 | 0.26  | 0.07 | 4 | 16.5  |
| 223 | SCLAREOLIDE                                                                                | 564-20-5                                   | C16H26O2     | 250.38  | antimicrobial                                                                                          | p1 1-1  | 26.58 | 5.98  | 4 | 0.57  | 0.18 | 4 | 32.7  |
| 224 | ADRENOLONE HYDROCHLORIDE                                                                   | 62-13-5, 99-45-6 (base)                    | C9H12ClNO3   | 217.65  | adrenergic (ophthalmic)                                                                                | p6 8-8  | 26.43 | 5.66  | 4 | -0.22 | 0.02 | 4 | -16.6 |
| 225 | LIMONIN                                                                                    | 1180-71-8                                  | C26H30O8     | 470.52  |                                                                                                        | p7 1-8  | 26.18 | 5.78  | 4 | -0.12 | 0.05 | 4 | -8.4  |
| 226 | HECOGENIN                                                                                  | 467-55-0                                   | C27H42O4     | 430.63  | antiinflammatory                                                                                       | p4 1-8  | 26.18 | 5.78  | 4 | -0.23 | 0.05 | 4 | -17.3 |
| 227 | LUPININE                                                                                   | 486-70-4                                   | C10H19NO     | 169.27  | antifeedant, antiinflammatory, oxytoxic                                                                | p3 2-4  | 26.07 | 3.70  | 4 | 0.18  | 0.12 | 4 | 11.8  |
| 228 | VERATRINE SULFATE                                                                          | 62-59-9                                    | C32H51NO13S  | 689.83  | antihypertensive                                                                                       | p6 10-8 | 25.98 | 3.40  | 4 | -0.06 | 0.02 | 4 | -4.3  |
| 229 | LUPEOL ACETATE                                                                             | 1617-68-1                                  | C32H52O2     | 468.77  | antiulcer                                                                                              | p5 6-7  | 25.85 | 8.48  | 4 | -0.17 | 0.06 | 4 | -12.1 |
| 230 | TYLOSIN TARTRATE                                                                           | 1405-54-5, 1401-69-                        | C50H83NO23   | 1066.21 | antibacterial                                                                                          | p10 7-7 | 25.75 | 3.76  | 4 | -0.19 | 0.10 | 4 | -14.2 |
| 231 | ALLYLSIOTHIOCYANATE                                                                        | 57-06-7                                    | C4H5NS       | 99.16   | counterirritant                                                                                        | p10 5-4 | 25.73 | 5.30  | 4 | 0.28  | 0.05 | 4 | 17.7  |
| 232 | THEAFLAVIN MONOGALLATES                                                                    | 0                                          | C36H28O16    | 716.61  |                                                                                                        | p3 7-7  | 25.59 | 5.29  | 4 | -0.10 | 0.05 | 4 | -7.4  |
| 233 | SKATOLE                                                                                    | 83-34-1                                    | C9H9N        | 131.18  | insect attractant                                                                                      | p7 8-7  | 25.24 | 4.65  | 4 | 0.30  | 0.04 | 4 | 18.5  |
| 234 | ASIATIC ACID                                                                               | 464-92-6                                   | C30H48O5     | 488.71  | wound healing, experimental carcinogen                                                                 | p5 6-1  | 25.12 | 1.68  | 4 | -0.29 | 0.09 | 4 | -22.7 |
| 235 | COLCHICINE                                                                                 | 64-86-8                                    | C22H25NO6    | 399.45  | antimitotic, antigout agent                                                                            | p7 5-3  | 24.94 | 12.09 | 4 | -0.34 | 0.08 | 4 | -26.5 |
| 236 | OLEANOIC ACID                                                                              | 508-02-1                                   | C30H48O3     | 456.72  |                                                                                                        | p4 5-3  | 24.94 | 12.09 | 4 | -0.45 | 0.08 | 4 | -36.8 |
| 237 | COLFORSIN                                                                                  | 66575-29-9                                 | C22H34O7     | 410.51  | adenylate cyclase activator, antiglaucoma, hypotensive, vasodilator                                    | p10 1-7 | 24.79 | 7.28  | 4 | 0.14  | 0.05 | 4 | 9.4   |
| 238 | CHRYSANTHEMIC ACID, ETHYL ESTER                                                            | 0                                          | C12H20O2     | 196.29  | insecticide                                                                                            | p1 6-2  | 24.65 | 11.12 | 4 | -0.97 | 0.06 | 4 | -95.7 |
| 239 | METAMECONINE                                                                               | 0                                          | C10H10O4     | 194.19  |                                                                                                        | p7 9-6  | 24.49 | 0.94  | 4 | 0.33  | 0.05 | 4 | 20.2  |
| 240 | BISANHYDRORUTILANTINONE                                                                    | 749-18-8                                   | C22H16O7     | 392.37  | antibacterial                                                                                          | p9 7-6  | 24.47 | 2.89  | 4 | -0.16 | 0.11 | 4 | -12.0 |
| 241 | DOCOSANOL                                                                                  | 661-19-8                                   | C22H46O      | 326.61  | antiviral                                                                                              | p6 1-8  | 24.37 | 1.69  | 4 | -0.38 | 0.06 | 4 | -30.5 |
| 242 | CURCUMIN                                                                                   | 458-37-7                                   | C21H20O6     | 368.39  | antiedemic, antiinflammatory, bile stimulant; antibacterial, antifungal, lipo/cyclooxygenase inhibitor | p3 7-6  | 24.26 | 5.24  | 4 | 0.03  | 0.02 | 4 | 2.4   |
| 243 | beta-CARYOPHYLLENE ALCOHOL                                                                 | 0                                          | C15H26O      | 222.37  |                                                                                                        | p3 3-8  | 24.19 | 6.28  | 4 | 0.03  | 0.04 | 4 | 1.9   |
| 244 | MEVASTATIN                                                                                 | 73573-88-3                                 | C23H34O5     | 390.52  | antihyperlipidemic, HMGCoA reductase inhibitor                                                         | p6 8-6  | 24.00 | 5.21  | 4 | 0.22  | 0.09 | 4 | 14.4  |
| 245 | SPERMIDINE TRIHYDROCHLORIDE                                                                | 0                                          | C7H22Cl3N3   | 254.63  | ornithine decarboxylase inhibitor                                                                      | p8 7-1  | 23.90 | 2.28  | 4 | -0.63 | 0.05 | 4 | -54.4 |
| 246 | 3-NOR-3-OXOPANASINSAN-6-OL                                                                 | 0                                          | C14H22O2     | 222.33  |                                                                                                        | p2 1-8  | 23.88 | 9.87  | 4 | 0.24  | 0.07 | 4 | 15.3  |
| 247 | 2-METHYLENE-5-(2,5-DIOXOTETRAHYDROFURAN-3-YL)-6-OXO-10,10-DIMETHYLBICYCLO[7: 2: 0]UNDECANE | 0                                          | C18H24O4     | 304.39  |                                                                                                        | p3 1-3  | 23.70 | 7.60  | 4 | -0.09 | 0.11 | 4 | -6.8  |
| 248 | AZADIRACTIN                                                                                | 11141-17-6                                 | C35H44O16    | 720.73  | antifeedant, insecticide                                                                               | p7 1-6  | 23.68 | 7.08  | 4 | 0.00  | 0.03 | 4 | -0.1  |
| 249 | ORSELLINIC ACID, ETHYL ESTER                                                               | 2524-37-0                                  | C10H12O4     | 196.20  |                                                                                                        | p4 1-6  | 23.68 | 7.08  | 4 | -0.12 | 0.03 | 4 | -8.3  |
| 250 | METHYL GAMBOGATE METHYL ETHER                                                              | 0                                          | C40H48O8     | 656.82  |                                                                                                        | P2 7-6  | 23.61 | 5.17  | 4 | 0.37  | 0.20 | 4 | 22.4  |
| 251 | ADENOSINE PHOSPHATE                                                                        | 61-19-8                                    | C10H14N5O7P  | 347.23  | vasodilator, neuromodulator                                                                            | p10 7-4 | 23.53 | 5.52  | 4 | -0.16 | 0.02 | 4 | -11.8 |
| 252 | METHYL DEOXYCHOLATE                                                                        | 3245-38-3                                  | C25H42O4     | 406.61  |                                                                                                        | P2 10-7 | 23.38 | 14.27 | 4 | 0.66  | 0.07 | 4 | 36.7  |
| 253 | DJENKOLIC ACID                                                                             | 498-59-9                                   | C7H14N2O4S2  | 254.33  |                                                                                                        | p3 3-1  | 23.33 | 8.14  | 4 | 0.00  | 0.05 | 4 | 0.2   |
| 254 | HYPOXANTHINE                                                                               | 68-94-0                                    | C5H4N4O      | 136.11  |                                                                                                        | p3 9-7  | 23.21 | 5.53  | 4 | 0.22  | 0.13 | 4 | 14.3  |
| 255 | PICROTOXININ                                                                               | 17617-45-7                                 | C15H16O6     | 292.29  | convulsant, GABA receptor antagonist, ichthyotoxin                                                     | p8 10-8 | 23.15 | 1.78  | 4 | -0.81 | 0.36 | 4 | -75.3 |
| 256 | DANTHRON                                                                                   | 117-10-2                                   | C14H8O4      | 240.22  | cathartic                                                                                              | p6 9-8  | 22.99 | 2.14  | 4 | -0.12 | 0.05 | 4 | -8.6  |
| 257 | RAUWOLSCINE HYDROCHLORIDE                                                                  | 6211-32-1                                  | C21H27ClN2O3 | 390.91  | alpha2 adrenergic antagonist                                                                           | p8 1-8  | 22.85 | 10.47 | 4 | -0.17 | 0.05 | 4 | -12.6 |
| 258 | XANTHOPTERIN                                                                               | 119-44-8                                   | C6H5NSO2     | 179.14  | cell proliferation inhibitor                                                                           | P2 10-2 | 22.72 | 5.69  | 4 | 0.47  | 0.20 | 4 | 27.9  |
| 259 | 2-ACETILPYRROLE                                                                            | 1072-83-9                                  | C6H7NO       | 109.13  | hepatoprotectant, organoleptic                                                                         | p9 2-4  | 22.62 | 11.65 | 4 | -0.43 | 0.13 | 4 | -34.6 |
| 260 | DEHYDROVARIABILIN                                                                          | 0                                          | C17H14O4     | 282.30  |                                                                                                        | p2 4-5  | 22.03 | 3.24  | 4 | -0.42 | 0.13 | 4 | -33.6 |
| 261 | L(+/-)-ALLIIN                                                                              | 556-27-4(-)                                | C6H11NO3S    | 177.22  | antibacterial, antioxidant                                                                             | p5 3-1  | 21.98 | 7.50  | 4 | -0.17 | 0.05 | 4 | -12.5 |
| 262 | ESTRADIOL                                                                                  | 50-28-2                                    | C18H24O2     | 272.39  | estrogen                                                                                               | p10 7-1 | 21.97 | 4.36  | 4 | -0.19 | 0.07 | 4 | -13.8 |
| 263 | NALOXONE HYDROCHLORIDE                                                                     | 357-08-4, 51481-60-8 [dihydrate], 465-65-6 | C19H22ClNO4  | 363.84  | narcotic antagonist                                                                                    | p8 1-2  | 21.86 | 11.79 | 4 | 0.20  | 0.12 | 4 | 12.7  |

|     |                                  |                                                                     |                 |         |                                                                                        |         |       |       |   |       |      |   |       |
|-----|----------------------------------|---------------------------------------------------------------------|-----------------|---------|----------------------------------------------------------------------------------------|---------|-------|-------|---|-------|------|---|-------|
| 264 | LACCAIC ACID A                   | 15979-35-8                                                          | C26H19NO12      | 537.44  |                                                                                        | p3 2-6  | 21.81 | 2.10  | 4 | -0.09 | 0.06 | 4 | -6.6  |
| 265 | GOSSYPOL                         | 303-45-7                                                            | C30H30O8        | 518.57  | antispermatogenic, antineoplastic, antiHIV                                             | p9 7-5  | 21.38 | 3.16  | 4 | 0.45  | 0.05 | 4 | 26.6  |
| 266 | HYDROCORTISONE                   | 50-23-7                                                             | C21H30O5        | 362.47  | glucocorticoid, antiinflammatory                                                       | p6 7-8  | 21.10 | 7.54  | 4 | -0.47 | 0.07 | 4 | -38.1 |
| 267 | CHOLINE CHLORIDE                 | 67-48-1, 62-49-7 [choline]                                          | C5H14ClNO       | 139.63  | choleric, lipotropic, hepatoprotectant                                                 | p6 4-8  | 20.98 | 6.76  | 4 | 0.33  | 0.43 | 4 | 20.6  |
| 268 | PICROPODOPHYLLIN ACETATE         | 0                                                                   | C24H24O9        | 456.45  |                                                                                        | p8 8-1  | 20.82 | 8.69  | 4 | 1.02  | 0.05 | 4 | 50.6  |
| 269 | FRIEDELIN                        | 559-74-0                                                            | C30H50O         | 426.73  |                                                                                        | p4 6-3  | 20.81 | 6.77  | 4 | -0.23 | 0.14 | 4 | -17.6 |
| 270 | CREATININE                       | 60-27-5                                                             | C4H7N3O         | 113.12  | metabolic enhancer                                                                     | p5 6-6  | 20.47 | 12.29 | 4 | 0.00  | 0.03 | 4 | 0.2   |
| 271 | THEOPHYLLINE                     | 5967-84-0, 58-55-9                                                  | C7H8N4O2        | 180.17  | bronchodilator                                                                         | p6 3-8  | 20.47 | 4.96  | 4 | -0.29 | 0.14 | 4 | -22.6 |
| 272 | CHRYSIN                          | 480-40-0                                                            | C15H10O4        | 254.24  | diuretic                                                                               | p4 7-7  | 20.34 | 2.92  | 4 | 0.14  | 0.02 | 4 | 9.3   |
| 273 | 2-METHOXYRESORCINOL              | 29267-67-2                                                          | C7H8O3          | 140.14  |                                                                                        | p7 3-8  | 20.33 | 3.07  | 4 | -0.20 | 0.09 | 4 | -15.0 |
| 274 | XANTHURENIC ACID                 | 59-00-7                                                             | C10H7NO4        | 205.17  | caspace activator, guanylyl cyclase stimulant                                          | p4 3-8  | 20.33 | 3.07  | 4 | -0.32 | 0.09 | 4 | -24.4 |
| 275 | DEOXYAPPANONE B TRIMETHYL ETHER  | 0                                                                   | C19H20O5        | 328.37  |                                                                                        | p5 3-4  | 20.25 | 5.01  | 4 | 0.04  | 0.07 | 4 | 2.4   |
| 276 | 4'-METHOXYCHALCONE               | 22966-19-4                                                          | C16H14O2        | 238.29  |                                                                                        | p2 4-4  | 20.03 | 0.97  | 4 | -0.16 | 0.08 | 4 | -12.0 |
| 277 | BETAINE HYDROCHLORIDE            | 590-46-5, 141-58-2 [replaced], 107-43-7                             | C5H12ClNO2      | 153.61  | antiarteriosclerotic, hypolipaemic, hepatoprotectant                                   | p10 7-6 | 19.87 | 1.17  | 4 | -0.38 | 0.05 | 4 | -30.0 |
| 278 | KAEMPFEROL                       | 520-18-3                                                            | C15H10O6        | 286.24  |                                                                                        | p7 9-7  | 19.76 | 2.90  | 4 | 0.54  | 0.09 | 4 | 31.2  |
| 279 | PAROMOMYCIN SULFATE              | 1263-89-4, 7542-37-2 [paromomycin], 59-04-1 [paromomycin, replaced] | C23H47N5O18S    | 713.72  | antibacterial, antiamebic                                                              | p10 9-6 | 19.72 | 5.12  | 4 | 0.08  | 0.05 | 4 | 5.5   |
| 280 | DIALLYL SULFIDE                  | 592-88-1                                                            | C6H10S          | 114.21  | antibacterial, antifungal, antineoplastic, antihypercholesterolaemic, hepatoprotectant | p8 1-3  | 19.62 | 2.17  | 4 | -0.01 | 0.10 | 4 | -0.8  |
| 281 | 3-AMINO-beta-PINENE              | 0                                                                   | C10H18ClN       | 187.71  |                                                                                        | p2 3-6  | 19.24 | 13.24 | 4 | 0.42  | 0.15 | 4 | 25.3  |
| 282 | EUPARIN                          | 532-48-9                                                            | C13H12O3        | 216.24  |                                                                                        | p2 5-6  | 19.01 | 4.38  | 4 | 0.23  | 0.06 | 4 | 14.6  |
| 283 | 2,6-DIHYDROXY-4-METHOXYTOLUENE   | 0                                                                   | C8H10O3         | 154.17  |                                                                                        | p9 7-1  | 18.96 | 8.38  | 4 | 0.06  | 0.12 | 4 | 4.4   |
| 284 | PEONOL METHYL ETHER              | 829-20-9                                                            | C10H12O3        | 180.21  |                                                                                        | p9 4-6  | 18.92 | 6.94  | 4 | -0.31 | 0.17 | 4 | -24.3 |
| 285 | CAFFEIC ACID                     | 331-39-5                                                            | C9H8O4          | 180.16  |                                                                                        | p9 3-5  | 18.92 | 7.23  | 4 | -0.34 | 0.10 | 4 | -26.2 |
| 286 | USNIC ACID                       | 125-46-2                                                            | C18H16O7        | 344.32  | antibacterial                                                                          | p5 3-8  | 18.84 | 7.20  | 4 | -0.31 | 0.05 | 4 | -23.9 |
| 287 | TANGERITIN                       | 481-53-8                                                            | C20H20O7        | 372.38  |                                                                                        | p1 10-1 | 18.55 | 2.07  | 4 | 0.12  | 0.10 | 4 | 8.0   |
| 288 | SANGUINARINE SULFATE             | 5578-73-4                                                           | C20H15NO8S      | 429.41  | antineoplastic, antiplaque agent                                                       | p1 8-1  | 18.55 | 2.07  | 4 | 0.07  | 0.04 | 4 | 4.9   |
| 289 | HELICIN                          | 618-65-5                                                            | C13H16O7        | 284.27  |                                                                                        | P2 10-8 | 18.55 | 13.31 | 4 | 0.07  | 0.11 | 4 | 4.7   |
| 290 | IZALPININ                        | 480-14-4                                                            | C16H12O5        | 284.27  |                                                                                        | p8 5-1  | 18.39 | 12.07 | 4 | 0.18  | 0.14 | 4 | 11.5  |
| 291 | LOBARIC ACID                     | 0                                                                   | C25H28O8        | 456.50  |                                                                                        | p3 2-5  | 18.17 | 5.37  | 4 | 0.20  | 0.12 | 4 | 13.1  |
| 292 | DIHYDROSTREPTOMYCIN SULFATE      | 5490-27-7, 128-46-1 [dihydrostreptomycin]                           | C21H43N7O16S    | 681.68  | antibacterial, tuberculostatic                                                         | p10 5-1 | 17.98 | 8.83  | 4 | 0.05  | 0.21 | 4 | 3.4   |
| 293 | d,l-threo-3-HYDROXYASPARTIC ACID | 4294-45-5                                                           | C4H7NO5         | 149.10  | L-aspartate beta-carboxylase inhibitor                                                 | p1 7-8  | 17.79 | 2.80  | 4 | 0.16  | 0.04 | 4 | 10.7  |
| 294 | HESPERETIN                       | 520-33-2                                                            | C16H14O6        | 302.29  |                                                                                        | p7 6-5  | 17.64 | 6.87  | 4 | -0.02 | 0.05 | 4 | -1.2  |
| 295 | OLEANDOMYCIN PHOSPHATE           | 3922-90-5 (base)                                                    | C35H64NO16P     | 785.87  | antibacterial                                                                          | p6 6-8  | 17.62 | 4.33  | 4 | 3.02  | 3.38 | 4 | 87.6  |
| 296 | CATECHIN TETRAMETHYLETHER        | 0                                                                   | C19H22O6        | 346.38  |                                                                                        | p2 4-3  | 17.53 | 5.71  | 4 | -0.47 | 0.14 | 4 | -38.4 |
| 297 | CYANOCOBALAMIN                   | 68-19-9                                                             | C63H92CoN14O14P | 1359.43 | vitamin, coenzyme B12                                                                  | p10 7-5 | 16.98 | 4.68  | 4 | -0.32 | 0.02 | 4 | -24.5 |
| 298 | CEPHARANTHINE                    | 481-49-2                                                            | C37H38N2O6      | 606.73  | antineoplastic, hepatoprotectant, radioprotective                                      | p6 9-6  | 16.84 | 14.23 | 4 | 0.33  | 0.09 | 4 | 20.5  |
| 299 | ARTEMISININ                      | 63968-64-9                                                          | C15H22O5        | 282.34  | antimalarial                                                                           | p5 8-8  | 16.73 | 3.78  | 4 | 0.00  | 0.04 | 4 | 0.0   |
| 300 | SALVINORIN A                     | 83729-01-5                                                          | C23H28O8        | 432.47  | k-opioid receptor agonist, psychotropic                                                | p7 3-5  | 16.71 | 5.50  | 4 | 0.53  | 0.09 | 4 | 30.5  |
| 301 | LEOIDIN                          | 105350-54-7                                                         | C18H14Cl2O7     | 413.21  |                                                                                        | p4 3-5  | 16.71 | 5.50  | 4 | 0.41  | 0.09 | 4 | 24.9  |
| 302 | EUCALYPTOL                       | 470-82-6                                                            | C10H18O         | 154.25  | anthelmintic, antiseptic, expectorant                                                  | p10 9-7 | 16.23 | 6.83  | 4 | -0.22 | 0.04 | 4 | -16.4 |
| 303 | 2-BENZOYL-5-METHOXYBENZOQUINONE  | 0                                                                   | C14H10O4        | 242.23  |                                                                                        | p5 1-1  | 16.19 | 4.32  | 4 | -0.59 | 0.02 | 4 | -50.7 |
| 304 | ARBUTIN                          | 497-76-7                                                            | C12H16O7        | 272.26  |                                                                                        | P2 9-3  | 16.10 | 4.42  | 4 | 0.01  | 0.09 | 4 | 0.5   |
| 305 | KAWAIN                           | 3155-48-4                                                           | C14H14O3        | 230.27  |                                                                                        | p7 1-4  | 15.98 | 3.82  | 4 | -0.15 | 0.07 | 4 | -10.9 |
| 306 | CYTISINE                         | 485-35-8                                                            | C11H14N2O       | 190.25  | antiinflammatory, respiratory stimulant                                                | p4 1-4  | 15.98 | 3.82  | 4 | -0.26 | 0.07 | 4 | -20.0 |
| 307 | PICEID METHYL ETHER              | 30197-14-9                                                          | C21H24O8        | 404.42  | antioxidant                                                                            | p8 10-6 | 15.82 | 7.55  | 4 | 0.52  | 0.33 | 4 | 30.3  |
| 308 | AVOCADYNE ACETATE                | 24607-06-5                                                          | C19H34O4        | 326.48  | antifungal                                                                             | p5 8-7  | 15.78 | 4.31  | 4 | 0.19  | 0.08 | 4 | 12.2  |
| 309 | 4-HYDROXY-6-METHYLPYRAN-2-ONE    | 675-10-5                                                            | C6H6O3          | 126.11  |                                                                                        | p3 10-7 | 15.41 | 3.25  | 4 | 0.04  | 0.08 | 4 | 3.1   |
| 310 | TIGOGENIN                        | 77-60-1                                                             | C27H44O3        | 416.65  |                                                                                        | p2 4-7  | 15.39 | 2.37  | 4 | -0.40 | 0.02 | 4 | -31.8 |
| 311 | STREPTOMYCIN SULFATE             | 3810-74-0, 57-92-1                                                  | C21H41N7O16S    | 679.66  | antibacterial (tuberculostatic)                                                        | p10 7-3 | 15.36 | 5.64  | 4 | -0.10 | 0.04 | 4 | -7.1  |

|     |                                     |                                                     |              |        |                                                              |         |       |       |   |       |      |   |       |
|-----|-------------------------------------|-----------------------------------------------------|--------------|--------|--------------------------------------------------------------|---------|-------|-------|---|-------|------|---|-------|
| 312 | HAEMATOMIC ACID, ETHYL ESTER        | 39503-14-5                                          | C11H12O5     | 224.22 |                                                              | P2 7-5  | 15.27 | 9.76  | 4 | 0.12  | 0.11 | 4 | 8.0   |
| 313 | SOLANESYL ACETATE                   | 0                                                   | C47H76O2     | 673.13 |                                                              | p4 6-2  | 15.24 | 4.90  | 4 | -0.20 | 0.10 | 4 | -14.8 |
| 314 | ANDROSTA-1,4-DIEN-3,17-DIONE        | 897-06-3                                            | C19H24O2     | 284.40 |                                                              | p3 6-6  | 15.07 | 12.25 | 4 | 0.01  | 0.11 | 4 | 0.7   |
| 315 | VISNAGIN                            | 82-57-5                                             | C13H10O4     | 230.22 |                                                              | p1 1-2  | 15.05 | 13.87 | 3 | -0.27 | 0.17 | 4 | -20.7 |
| 316 | 2',4'-DIHYDROXY-4-METHOXYCHALCONE   | 81674-91-1                                          | C16H14O4     | 270.29 |                                                              | p1 4-2  | 14.88 | 10.99 | 4 | -1.00 | 0.20 | 4 | -99.8 |
| 317 | DERRUSININ                          | 14736-62-0                                          | C19H16O7     | 356.34 |                                                              | p7 2-7  | 14.81 | 6.25  | 4 | -0.10 | 0.12 | 4 | -7.3  |
| 318 | SALIDROSIDE                         | 10338-51-9                                          | C15H22O7     | 314.34 |                                                              | p4 2-7  | 14.81 | 6.25  | 4 | -0.22 | 0.12 | 4 | -16.1 |
| 319 | DIOSGENIN                           | 512-04-9                                            | C27H42O3     | 414.63 | antiinflammatory, estrogen                                   | p8 5-6  | 14.72 | 9.01  | 4 | 0.32  | 0.03 | 4 | 19.7  |
| 320 | ESTRIOL                             | 50-27-1, 514-68-1 [as,                              | C18H24O3     | 288.39 | estrogen                                                     | p10 8-1 | 14.41 | 3.17  | 4 | -0.12 | 0.03 | 4 | -8.4  |
| 321 | 1-MONOPALMITIN                      | 542-44-9                                            | C19H38O4     | 330.51 |                                                              | p3 2-3  | 14.21 | 5.96  | 4 | -0.10 | 0.12 | 4 | -7.1  |
| 322 | URSINOIC ACID                       | 30265-59-9                                          | C15H16O5     | 276.29 |                                                              | p6 1-3  | 14.19 | 6.68  | 4 | -0.46 | 0.15 | 4 | -37.5 |
| 323 | BIOCHANIN A                         | 491-80-5                                            | C16H12O5     | 284.27 | phytoestrogen                                                | p7 7-5  | 14.14 | 1.37  | 4 | 0.10  | 0.06 | 4 | 6.9   |
| 324 | SCOPOLAMINE HYDROBROMIDE            | 6533-68-2, 114-49-8<br>[anhydrous], 51-34-3         | C17H22BrNO4  | 384.27 | anticholinergic, treatment of motion sickness                | p8 10-1 | 13.97 | 3.61  | 4 | -0.37 | 0.08 | 4 | -29.6 |
| 325 | CHOLESTANE                          | 481-21-0                                            | C27H48       | 372.68 |                                                              | p2 6-8  | 13.94 | 4.58  | 4 | 0.19  | 0.10 | 4 | 12.2  |
| 326 | EPIAFZELECHIN TRIMETHYL ETHER       | 0                                                   | C18H20O5     | 316.36 |                                                              | p2 5-3  | 13.83 | 5.29  | 4 | 0.21  | 0.09 | 4 | 13.4  |
| 327 | DIOSMIN                             | 520-27-4                                            | C28H32O15    | 608.56 | vascular protectant                                          | p5 2-1  | 13.82 | 8.13  | 4 | -0.65 | 0.08 | 4 | -57.1 |
| 328 | IRIGENIN TRIMETHYL ETHER            | 0                                                   | C21H22O8     | 402.40 |                                                              | p5 1-3  | 13.72 | 5.05  | 4 | -0.48 | 0.11 | 4 | -39.9 |
| 329 | MUNDOSERONE                         | 3564-85-0                                           | C19H18O6     | 342.35 |                                                              | p2 2-2  | 13.71 | 4.46  | 4 | 0.17  | 0.11 | 4 | 11.4  |
| 330 | COLCHICINE                          | 477-27-0                                            | C21H23NO6    | 385.42 | antimitotic                                                  | p8 8-2  | 13.67 | 3.66  | 4 | -0.43 | 0.09 | 4 | -34.9 |
| 331 | SMILAGENIN                          | 126-18-1                                            | C27H44O3     | 416.65 |                                                              | p2 3-1  | 13.52 | 9.54  | 4 | 0.58  | 0.17 | 4 | 33.2  |
| 332 | FORMONONETIN                        | 485-72-3                                            | C16H12O4     | 268.27 | phytoestrogen                                                | p4 7-1  | 13.17 | 6.00  | 4 | -0.62 | 0.09 | 4 | -53.6 |
| 333 | 3,7-EPOXYCARYOPHYLLAN-6-ONE         | 0                                                   | C15H24O2     | 236.36 |                                                              | p2 1-5  | 13.14 | 15.03 | 4 | 0.27  | 0.16 | 4 | 17.0  |
| 334 | COUMARIN                            | 91-64-5                                             | C9H6O2       | 146.15 | antineoplastic, antiinflammatory,<br>antihyperglycaemic      | p6 4-1  | 12.97 | 3.50  | 4 | -0.05 | 0.05 | 4 | -3.8  |
| 335 | 2'-METHOXYFORMONETIN                | 0                                                   | C17H14O5     | 298.30 |                                                              | p9 10-6 | 12.89 | 7.80  | 4 | 0.18  | 0.04 | 4 | 11.5  |
| 336 | 3,7-EPOXYCARYOPHYLLAN-6-OL          | 0                                                   | C15H26O2     | 238.37 |                                                              | p2 6-5  | 12.87 | 11.01 | 4 | 0.11  | 0.02 | 4 | 7.2   |
| 337 | ASCORBIC ACID                       | 50-81-7                                             | C6H8O6       | 176.13 | antiscorbutic, antiviral                                     | p10 3-6 | 12.01 | 3.61  | 4 | 0.44  | 0.46 | 4 | 26.2  |
| 338 | EPHEDRINE (1R,2S) HYDROCHLORIDE     | 50-98-6, 299-42-3 [(-)-                             | C10H16ClNO   | 201.70 | bronchodilator, cardiac stimulant                            | p8 4-1  | 11.97 | 8.77  | 4 | -0.06 | 0.14 | 4 | -4.2  |
| 339 | MONOCROTALINE                       | 315-22-0                                            | C16H23NO6    | 325.36 | antineoplastic, insect sterilant                             | p9 9-7  | 11.96 | 2.49  | 4 | 0.14  | 0.08 | 4 | 9.5   |
| 340 | ANHYDROBRAZILIC ACID                | 0                                                   | C12H10O5     | 234.21 |                                                              | p4 7-6  | 11.90 | 1.58  | 4 | -0.01 | 0.07 | 4 | -0.5  |
| 341 | BIOTIN                              | 58-85-5                                             | C10H16N2O3S  | 244.31 | vitamin B complex                                            | p10 8-6 | 11.89 | 4.14  | 4 | -0.24 | 0.06 | 4 | -18.4 |
| 342 | INOSITOL                            | 87-89-8                                             | C6H12O6      | 180.16 | growth factor                                                | p10 4-2 | 11.86 | 6.91  | 4 | 0.08  | 0.07 | 4 | 5.5   |
| 343 | ROTONONIC ACID, METHYL ETHER        | 0                                                   | C24H26O6     | 410.47 |                                                              | p6 4-3  | 11.77 | 4.72  | 4 | 0.30  | 0.05 | 4 | 18.7  |
| 344 | 3,4-DIMETHOXYDALBERGIONE            | 41043-20-3                                          | C17H16O4     | 284.31 | induces dermatitis                                           | p8 3-7  | 11.56 | 11.82 | 4 | 0.06  | 0.04 | 4 | 3.8   |
| 345 | HARMALOL HYDROCHLORIDE<br>DIHYDRATE | 6028-07-5                                           | C12H17ClN2O3 | 272.73 | anthelmintic, narcotic agent                                 | p8 7-8  | 11.47 | 5.47  | 4 | -0.76 | 0.07 | 4 | -69.6 |
| 346 | PERSEITOL                           | 527-06-0                                            | C7H16O7      | 212.20 |                                                              | p2 4-2  | 11.32 | 4.16  | 4 | -0.23 | 0.23 | 4 | -17.1 |
| 347 | beta-AMYRIN ACETATE                 | 1616-93-9                                           | C32H52O2     | 468.77 |                                                              | p5 8-4  | 11.26 | 3.57  | 4 | 0.01  | 0.06 | 4 | 0.5   |
| 348 | QUINIDINE GLUCONATE                 | 7054-25-3, 6591-63-5<br>[quinidine sulfate], 56-54- | C26H36N2O9   | 520.58 | antiarrhythmic, antimalarial                                 | p10 2-3 | 11.23 | 4.82  | 4 | -0.03 | 0.08 | 4 | -2.0  |
| 349 | SAPPANONE A DIMETHYL ETHER          | 0                                                   | C18H16O5     | 312.33 |                                                              | p5 4-3  | 11.12 | 6.11  | 4 | 0.18  | 0.06 | 4 | 11.8  |
| 350 | ANTIMYCIN A (A1 shown)              | 1397-94-0                                           | C27H38N2O9   | 534.61 | antifungal, antiviral, interferes in cytochrome<br>oxidation | p5 4-7  | 10.91 | 5.69  | 4 | 0.12  | 0.15 | 4 | 7.7   |
| 351 | 11a-ACETOXYPROGESTERONE             | 2268-98-6                                           | C23H32O4     | 372.51 | metabolite of progesterone                                   | p5 4-1  | 10.83 | 5.10  | 4 | -0.22 | 0.08 | 4 | -16.6 |
| 352 | CATECHIN PENTAACETATE               | 0                                                   | C25H24O11    | 500.46 |                                                              | p9 6-6  | 10.66 | 6.03  | 4 | -0.26 | 0.03 | 4 | -19.6 |
| 353 | ESCULIN MONOHYDRATE                 | 531-75-9                                            | C15H18O10    | 358.30 | antiinflammatory                                             | p8 9-7  | 10.62 | 2.38  | 4 | -0.42 | 0.12 | 4 | -34.0 |
| 354 | LUPANINE PERCHLORATE                | 550-90-3 (base)                                     | C15H25ClN2O5 | 348.83 |                                                              | p1 9-2  | 10.49 | 11.23 | 4 | -0.09 | 0.03 | 4 | -6.1  |
| 355 | DIHYDROROTENONE                     | 0                                                   | C23H24O6     | 396.44 |                                                              | p8 10-3 | 10.36 | 5.33  | 4 | 0.76  | 0.10 | 4 | 40.9  |
| 356 | SHIKIMIC ACID                       | 138-59-0                                            | C7H10O5      | 174.15 |                                                              | p1 7-2  | 10.28 | 12.75 | 4 | 0.06  | 0.15 | 4 | 3.9   |
| 357 | THEAFLAVIN                          | 4670-05-7                                           | C29H24O12    | 564.51 | antioxidant                                                  | p4 8-5  | 10.19 | 1.90  | 4 | 0.11  | 0.06 | 4 | 7.6   |
| 358 | SEROTONIN HYDROCHLORIDE             | 50-67-9                                             | C10H13ClN2O  | 212.68 | neurotransmitter                                             | p3 6-1  | 10.18 | 7.38  | 4 | -0.40 | 0.05 | 4 | -31.7 |
| 359 | HEMATEIN                            | 475-25-2                                            | C16H12O6     | 300.27 |                                                              | p1 9-3  | 10.13 | 3.46  | 4 | 0.13  | 0.03 | 4 | 8.6   |
| 360 | EPIGALLOCATECHIN-3-MONOGALLATE      | 989-51-5                                            | C22H18O11    | 458.38 |                                                              | p2 6-3  | 10.02 | 3.33  | 4 | -0.19 | 0.24 | 4 | -14.2 |



|     |                                       |                        |               |        |                                                               |         |      |       |   |       |      |   |       |
|-----|---------------------------------------|------------------------|---------------|--------|---------------------------------------------------------------|---------|------|-------|---|-------|------|---|-------|
| 361 | TETRAHYDROSAPPANONE A TRIMETHYL ETHER | 0                      | C19H22O5      | 330.38 |                                                               | p8 2-5  | 9.90 | 14.12 | 4 | -0.10 | 0.10 | 4 | -6.9  |
| 362 | 4'-HYDROXYCHALCONE                    | 2657-25-2              | C15H12O2      | 224.26 |                                                               | P2 8-6  | 9.45 | 17.15 | 4 | 0.33  | 0.24 | 4 | 20.5  |
| 363 | SANTONIN                              | 481-06-1               | C15H18O3      | 246.31 |                                                               | P2 10-3 | 9.41 | 6.60  | 4 | 0.18  | 0.08 | 4 | 11.8  |
| 364 | CDRYL ACETATE                         | 77-54-3                | C17H28O2      | 264.41 |                                                               | p2 5-7  | 9.38 | 7.19  | 4 | 0.05  | 0.26 | 4 | 3.6   |
| 365 | PALMATINE CHLORIDE                    | 10605-02-4             | C21H22ClNO4   | 387.87 | antibacterial, antimalarial, uterine contractant              | p3 8-4  | 9.29 | 3.91  | 4 | -0.09 | 0.06 | 4 | -6.1  |
| 366 | 7-HYDROXYFLAVONE                      | 6665-86-7              | C15H10O3      | 238.25 | antifungal, analgesic                                         | p7 3-6  | 9.24 | 3.62  | 4 | 0.17  | 0.05 | 4 | 10.8  |
| 367 | SECURININE                            | 5610-40-2              | C13H15NO2     | 217.27 | GABAA receptor blocker, CNS stimulant                         | p4 3-6  | 9.24 | 3.62  | 4 | 0.05  | 0.05 | 4 | 3.6   |
| 368 | LAGOCHILIN                            | 23554-81-6             | C20H36O5      | 356.51 |                                                               | P2 7-1  | 9.20 | 3.84  | 4 | 0.60  | 0.13 | 4 | 34.1  |
| 369 | ROBUSTIC ACID                         | 5307-59-5              | C22H20O6      | 380.40 |                                                               | p5 9-7  | 9.13 | 7.61  | 4 | 0.28  | 0.10 | 4 | 17.8  |
| 370 | PHENACYLAMINE HYDROCHLORIDE           | 5468-37-1, 613-89-     | C8H10ClNO     | 171.63 |                                                               | p8 10-4 | 9.11 | 3.46  | 4 | 1.22  | 0.29 | 4 | 57.0  |
| 371 | OROTIC ACID                           | 65-86-1                | C5H4N2O4      | 156.10 | hepatoprotectant, uricosuric agent                            | p6 6-5  | 8.85 | 2.92  | 4 | -0.39 | 0.14 | 4 | -31.1 |
| 372 | ANABASAMINE HYDROCHLORIDE             | 20410-87-1(base)       | C16H20ClN3    | 289.81 |                                                               | P2 8-1  | 8.75 | 22.46 | 4 | 0.40  | 0.11 | 4 | 24.3  |
| 373 | FARNESOL                              | 4602-84-0              | C15H26O       | 222.37 |                                                               | p5 8-6  | 8.75 | 3.76  | 4 | 0.02  | 0.03 | 4 | 1.0   |
| 374 | ARABITOL                              | 7643-75-6              | C5H12O5       | 152.15 |                                                               | p2 5-4  | 8.73 | 8.93  | 4 | -0.04 | 0.10 | 4 | -2.6  |
| 375 | CITRININ                              | 518-75-2               | C13H14O5      | 250.25 | antibacterial                                                 | p1 3-7  | 8.51 | 0.32  | 2 | 0.13  | 0.11 | 2 | 8.3   |
| 376 | ANTIAROL                              | 642-71-7               | C9H12O4       | 184.19 |                                                               | p4 7-5  | 8.48 | 1.70  | 4 | 0.10  | 0.04 | 4 | 6.9   |
| 377 | ARISTOLOCHIC ACID                     | 313-67-7               | C17H11NO7     | 341.28 | PLA2 inhibitor                                                | p9 6-2  | 8.39 | 7.27  | 4 | -0.03 | 0.24 | 4 | -1.8  |
| 378 | HYDROLYSIS PRODUCT OF BUSSEIN         | 0                      | C32H40O14     | 648.67 |                                                               | p2 4-8  | 8.30 | 8.98  | 4 | -0.69 | 0.03 | 4 | -60.9 |
| 379 | DEHYDROABIETAMIDE                     | 0                      | C20H29NO      | 299.46 |                                                               | p7 2-5  | 8.30 | 1.98  | 4 | -0.01 | 0.04 | 4 | -0.7  |
| 380 | BRAZILIN                              | 474-07-7               | C16H14O5      | 286.29 |                                                               | p4 2-5  | 8.30 | 1.98  | 4 | -0.12 | 0.04 | 4 | -8.9  |
| 381 | ONONETIN                              | 487-49-0               | C15H14O4      | 258.28 |                                                               | p9 7-2  | 8.27 | 4.90  | 4 | -0.18 | 0.11 | 4 | -12.9 |
| 382 | ALLANTOIN                             | 97-59-6                | C4H6N4O3      | 158.12 | wound healing agent                                           | p10 1-5 | 8.13 | 3.78  | 4 | -0.22 | 0.14 | 4 | -16.1 |
| 383 | 2-HYDROXY-3,4-DIMETHOXYBENZOIC ACID   | 5653-46-3              | C9H10O5       | 198.18 | prostaglandin synthetase inhibitor                            | p7 4-7  | 7.69 | 4.70  | 4 | 0.16  | 0.07 | 4 | 10.5  |
| 384 | 3-DESHYDROXYSAPPANOL TRIMETHYL ETHER  | 0                      | C19H22O5      | 330.38 |                                                               | p4 4-7  | 7.69 | 4.70  | 4 | 0.05  | 0.07 | 4 | 3.2   |
| 385 | TRETINOIN                             | 302-79-4               | C20H28O2      | 300.44 | keratolytic, antiacne, antineoplastic                         | p10 2-8 | 7.49 | 5.74  | 4 | -0.28 | 0.02 | 4 | -21.5 |
| 386 | SCLAREOL                              | 515-03-7               | C20H36O2      | 308.51 | antineoplastic, apoptosis inducer                             | p6 1-6  | 7.29 | 10.13 | 4 | -0.15 | 0.05 | 4 | -10.7 |
| 387 | DEHYDROEPIANDROSTERONE                | 53-43-0                | C19H28O2      | 288.43 |                                                               | p4 10-8 | 7.05 | 3.42  | 4 | -0.03 | 0.06 | 4 | -1.9  |
| 388 | EPIGALLOCATECHIN                      | 970-74-1               | C15H14O7      | 306.27 |                                                               | p2 5-5  | 7.01 | 3.36  | 4 | 0.15  | 0.06 | 4 | 9.9   |
| 389 | ANABASINE HYDROCHLORIDE               | 13078-04-1 (anabesine) | C10H15ClN2    | 198.70 | insecticide                                                   | p3 8-7  | 6.88 | 6.75  | 4 | -0.08 | 0.11 | 4 | -5.5  |
| 390 | BERBAMINE HYDROCHLORIDE               | 478-61-5 (berbamine)   | C37H42Cl2N2O6 | 681.66 | antihypertensive, skeletal muscle relaxant                    | p8 6-8  | 6.86 | 18.93 | 4 | -0.21 | 0.12 | 4 | -15.6 |
| 391 | GENISTEIN                             | 446-72-0               | C15H10O5      | 270.24 | increases bone mineral density                                | p6 3-3  | 6.85 | 14.63 | 4 | 0.20  | 0.01 | 4 | 12.7  |
| 392 | 3beta-HYDROXYISOLLOSPIROST-9(11)-ENE  | 0                      | C27H42O3      | 414.63 |                                                               | p6 7-7  | 6.79 | 10.10 | 4 | -0.17 | 0.06 | 4 | -12.6 |
| 393 | RETINOL                               | 68-26-8                | C20H30O       | 286.46 | vitamin A                                                     | p10 1-6 | 6.73 | 3.26  | 4 | 0.09  | 0.07 | 4 | 6.3   |
| 394 | AZELAIC ACID                          | 123-99-9               | C9H16O4       | 188.23 | antiacne, antiproliferative agent                             | p10 3-4 | 6.72 | 8.45  | 4 | 0.03  | 0.05 | 4 | 1.8   |
| 395 | HECOGENIN ACETATE                     | 915-35-5               | C29H44O5      | 472.67 |                                                               | p1 9-5  | 6.66 | 5.55  | 4 | -0.05 | 0.08 | 4 | -3.7  |
| 396 | FUCOSTANOL                            | 83-45-4                | C29H52O       | 416.74 |                                                               | p1 7-5  | 6.66 | 5.55  | 4 | -0.69 | 0.15 | 4 | -61.6 |
| 397 | GEDUNIN                               | 2753-30-2              | C28H34O7      | 482.58 | antifeedant; heat shock inducer                               | p8 7-6  | 6.58 | 8.52  | 4 | 0.02  | 0.03 | 4 | 1.2   |
| 398 | EPICATECHIN MONOGALLATE               | 1257-08-5              | C22H18O10     | 442.38 |                                                               | p2 3-3  | 6.24 | 5.97  | 4 | 0.38  | 0.08 | 4 | 23.1  |
| 399 | LINAMARIN                             | 554-35-8               | C10H17NO6     | 247.25 |                                                               | p1 6-6  | 6.23 | 7.26  | 4 | 0.59  | 0.08 | 4 | 33.5  |
| 400 | ADONITOL                              | 488-81-3               | C5H12O5       | 152.15 |                                                               | P2 7-4  | 6.19 | 1.71  | 4 | 0.26  | 0.11 | 4 | 16.4  |
| 401 | 2',4'-DIHYDROXYCHALCONE               | 1776-30-3              | C15H12O3      | 240.26 | anthelmintic, antiulcer                                       | p7 2-6  | 6.05 | 1.97  | 4 | 0.09  | 0.10 | 4 | 6.1   |
| 402 | KOPARIN                               | 65048-75-1             | C16H12O6      | 300.27 |                                                               | p4 2-6  | 6.05 | 1.97  | 4 | -0.02 | 0.10 | 4 | -1.6  |
| 403 | HOMOPTEROCARPIN                       | 606-91-7               | C17H16O4      | 284.31 |                                                               | p3 3-5  | 5.57 | 3.90  | 4 | -0.01 | 0.09 | 4 | -0.7  |
| 404 | ANISODAMINE HYDROBROMIDE              | 17659-49-3             | C17H23NO4     | 305.38 | anticholinergic, antispasmodic                                | p5 1-2  | 5.51 | 11.32 | 4 | -0.41 | 0.17 | 4 | -32.6 |
| 405 | YOHIMBINE HYDROCHLORIDE               | 65-19-0                | C21H27ClN2O3  | 390.91 | alpha adrenergic blocker, mydriatic, antidepressant           | p10 6-4 | 5.49 | 13.70 | 4 | -0.45 | 0.07 | 4 | -36.5 |
| 406 | LUPANYL ACID HYDROCHLORIDE            | 0                      | C14H25ClN2O2  | 288.82 |                                                               | p5 7-5  | 5.40 | 7.81  | 4 | 0.09  | 0.15 | 4 | 6.0   |
| 407 | CYSTAMINE DIHYDROCHLORIDE             | 56-17-7                | C4H14Cl2N2S2  | 225.20 | hepatoprotectant, radioprotectant                             | p6 6-6  | 5.08 | 1.87  | 4 | -0.15 | 0.05 | 4 | -11.2 |
| 408 | GARLICIN                              | 2179-57-9              | C6H10S2       | 146.27 | antineoplastic, antibacterial, apoptosis inducer, insecticide | p5 1-6  | 4.93 | 13.44 | 4 | -0.39 | 0.07 | 4 | -30.8 |
| 409 | GLUCITOL-4-GUCOPYANOSIDE              | 0                      | C12H24O11     | 344.32 |                                                               | p9 4-5  | 4.89 | 7.96  | 4 | -0.19 | 0.06 | 4 | -14.4 |
| 410 | AVOCATIN B                            | 0                      | C34H66O6      | 570.90 |                                                               | p7 10-5 | 4.87 | 5.74  | 4 | 0.36  | 0.07 | 4 | 21.9  |

|     |                                  |                                                   |              |        |                                                                                                                |          |      |       |   |       |      |   |       |
|-----|----------------------------------|---------------------------------------------------|--------------|--------|----------------------------------------------------------------------------------------------------------------|----------|------|-------|---|-------|------|---|-------|
| 411 | DIHYDROFISSINOLIDE               | 0                                                 | C29H38O8     | 514.62 |                                                                                                                | p4 9-2   | 4.50 | 2.93  | 4 | 0.08  | 0.05 | 4 | 5.3   |
| 412 | OMEGA-3-ACID ESTERS (EPA shown)  | 86227-47-6                                        | C22H34O2     | 330.52 | hypolipidemic                                                                                                  | p6 1-7   | 4.36 | 14.00 | 4 | -0.23 | 0.06 | 4 | -17.4 |
| 413 | DIHYDROMUNDULETONE               | 0                                                 | C25H28O6     | 424.50 |                                                                                                                | p2 6-7   | 4.35 | 5.15  | 4 | -0.10 | 0.03 | 4 | -7.4  |
| 414 | BEKANAMYCIN SULFATE              | 4696-76-8 (base)                                  | C18H39N5O14S | 581.60 | antibacterial                                                                                                  | p10 3-5  | 4.16 | 9.06  | 4 | 0.13  | 0.07 | 4 | 8.7   |
| 415 | PICEID                           | 27208-80-6                                        | C20H22O8     | 390.39 | antioxidant                                                                                                    | p5 2-7   | 4.10 | 0.69  | 4 | -0.36 | 0.13 | 4 | -28.7 |
| 416 | TOBRAMYCIN                       | 32986-56-4                                        | C18H37N5O9   | 467.52 | antibacterial, inhibits protein synthesis                                                                      | p10 9-3  | 4.08 | 4.67  | 4 | -0.49 | 0.19 | 4 | -40.8 |
| 417 | GRAYANOTOXIN I                   | 4720-09-6                                         | C22H36O7     | 412.53 |                                                                                                                | p1 1-3   | 3.95 | 7.58  | 4 | -0.03 | 0.26 | 3 | -2.4  |
| 418 | CAFFEINE                         | 58-08-2, 5743-12-4                                | C8H10N4O2    | 194.19 | CNS stimulant                                                                                                  | p2 1-1   | 3.94 | 4.95  | 4 | 0.27  | 0.08 | 4 | 16.9  |
| 419 | AURAPTENE                        | 495-02-3                                          | C19H22O3     | 298.39 | antineoplastic, apoptosis inducer                                                                              | p5 9-1   | 3.93 | 6.03  | 4 | 0.02  | 0.12 | 4 | 1.2   |
| 420 | ACTEIN                           | 18642-44-9                                        | C37H56O11    | 676.85 | antihypertensive                                                                                               | p8 9-1   | 3.90 | 15.38 | 4 | -0.41 | 0.09 | 4 | -33.3 |
| 421 | QUERCITRIN                       | 522-12-3                                          | C21H20O11    | 448.39 | antihemorrhagic                                                                                                | p2 2-1   | 3.89 | 5.08  | 4 | -0.65 | 0.46 | 4 | -57.2 |
| 422 | CINCHONIDINE                     | 485-71-2                                          | C19H22N2O    | 294.40 | antimalarial                                                                                                   | p8 4-7   | 3.76 | 12.00 | 4 | -0.20 | 0.06 | 4 | -15.2 |
| 423 | ATROPINE SULFATE                 | 51-55-8, 5908-99-6<br>[atropine sulfate], 55-48-1 | C17H25NO7S   | 387.46 | anticholinergic, mydriatic                                                                                     | P2 9-1   | 3.70 | 7.88  | 4 | 0.26  | 0.03 | 4 | 16.3  |
| 424 | FOLIC ACID                       | 59-30-3                                           | C19H19N7O6   | 441.41 | hematopoietic vitamin                                                                                          | p6 8-7   | 3.63 | 3.37  | 4 | 0.02  | 0.05 | 4 | 1.3   |
| 425 | SYRINGIC ACID                    | 530-57-4                                          | C9H10O5      | 198.18 |                                                                                                                | p3 8-1   | 3.63 | 5.94  | 4 | -0.26 | 0.07 | 4 | -20.0 |
| 426 | THYMOQUINONE                     | 0                                                 | C10H12O2     | 164.21 |                                                                                                                | p8 1-4   | 3.13 | 18.98 | 4 | -0.08 | 0.07 | 4 | -5.8  |
| 427 | EUGENOL                          | 97-53-0                                           | C10H12O2     | 164.21 | analgesic (topical), antiseptic, antifungal                                                                    | p10 10-1 | 3.09 | 5.56  | 4 | -0.36 | 0.04 | 4 | -28.5 |
| 428 | SAPPANONE A TRIMETHYL ETHER      | 0                                                 | C19H18O5     | 326.35 |                                                                                                                | p6 9-5   | 3.07 | 5.23  | 4 | 0.23  | 0.04 | 4 | 14.7  |
| 429 | HYMECHROME                       | 90-33-5                                           | C10H8O3      | 176.17 | chloretric, spasmolytic, sunscreen                                                                             | p7 3-1   | 2.86 | 6.06  | 4 | -0.28 | 0.01 | 4 | -21.2 |
| 430 | CINNAMIC ACID                    | 621-82-9                                          | C9H8O2       | 148.16 | fragrance & flavoring agent                                                                                    | p4 3-1   | 2.86 | 6.06  | 4 | -0.39 | 0.01 | 4 | -31.0 |
| 431 | ACONITINE                        | 302-27-2                                          | C34H47NO11   | 645.75 | anesthetic (gastric), antipyretic, and cardiotoxin                                                             | p10 7-2  | 2.84 | 6.92  | 4 | -0.16 | 0.07 | 4 | -11.7 |
| 432 | GALANTAMINE                      | 357-70-0, 1953-04-4<br>[hydrobromide]             | C17H21NO3    | 287.36 | anticholinesterase, analgesic, antiAlzheimer                                                                   | p6 6-7   | 2.66 | 4.46  | 4 | -0.34 | 0.08 | 4 | -26.2 |
| 433 | PHENYLALANINE (L) HYDROCHLORIDE  | 63-91-2(base)                                     | C9H12ClNO2   | 201.65 | amino acid                                                                                                     | p9 10-7  | 2.59 | 10.09 | 4 | -0.12 | 0.08 | 4 | -8.5  |
| 434 | 4-O-METHYLPHLORACETOPHENONE      | 7507-89-3                                         | C9H10O4      | 182.18 | antifungal                                                                                                     | p4 9-7   | 2.57 | 9.05  | 4 | 0.16  | 0.12 | 4 | 10.4  |
| 435 | ERGONOVINE MALEATE               | 129-51-1, 60-79-7                                 | C23H27N3O6   | 441.49 | oxytocic, 5HT antagonist                                                                                       | p6 4-7   | 2.56 | 2.61  | 4 | 0.23  | 0.07 | 4 | 14.5  |
| 436 | ISOROTENONE                      | 0                                                 | C23H22O6     | 394.43 |                                                                                                                | p1 2-7   | 2.53 | 6.12  | 4 | 0.71  | 0.16 | 4 | 38.9  |
| 437 | GLUTAMINE (D)                    | 6899-04-3                                         | C5H10N2O3    | 146.15 |                                                                                                                | p6 1-2   | 2.46 | 13.58 | 4 | -0.16 | 0.06 | 4 | -11.8 |
| 438 | PURPUGALLIN-4-CARBOXYLIC ACID    | 0                                                 | C12H8O7      | 264.19 | antioxidant                                                                                                    | p2 3-5   | 2.20 | 8.17  | 4 | 0.11  | 0.17 | 4 | 7.3   |
| 439 | URACIL                           | 66-22-8                                           | C4H4N2O2     | 112.09 | antineoplastic                                                                                                 | p7 2-3   | 2.08 | 6.08  | 4 | -0.28 | 0.05 | 4 | -21.4 |
| 440 | PEUCENIN                         | 578-72-3                                          | C15H16O4     | 260.29 |                                                                                                                | p4 2-3   | 2.08 | 6.08  | 4 | -0.39 | 0.05 | 4 | -31.3 |
| 441 | NARINGIN                         | 10236-47-2                                        | C27H32O14    | 580.55 | antihaemorrhagic, antiinflammatory                                                                             | p7 8-4   | 2.06 | 3.69  | 4 | 0.16  | 0.06 | 4 | 10.4  |
| 442 | ISOBERGAPTENE                    | 482-48-4                                          | C12H8O4      | 216.20 |                                                                                                                | p2 6-6   | 2.00 | 6.85  | 4 | 0.17  | 0.08 | 4 | 11.0  |
| 443 | CIANIDANOL                       | 154-23-4                                          | C15H14O6     | 290.28 | procollagen production inhibitoe,<br>hepatoprotectant                                                          | p6 6-4   | 2.00 | 2.91  | 4 | -0.20 | 0.10 | 4 | -14.9 |
| 444 | BACCATIN III                     | 27548-93-2                                        | C31H38O11    | 586.64 |                                                                                                                | P2 8-5   | 1.76 | 6.79  | 4 | 0.08  | 0.03 | 4 | 5.2   |
| 445 | MENTHYL BENZOATE                 | 0                                                 | C17H24O2     | 260.38 |                                                                                                                | p7 3-4   | 1.74 | 4.94  | 4 | 0.24  | 0.06 | 4 | 15.1  |
| 446 | XANTHYLETIN                      | 553-19-5                                          | C14H12O3     | 228.25 |                                                                                                                | p4 3-4   | 1.74 | 4.94  | 4 | 0.12  | 0.06 | 4 | 8.1   |
| 447 | APOTOXICAROL                     | 0                                                 | C18H14O7     | 342.31 |                                                                                                                | p7 9-4   | 1.64 | 2.64  | 4 | 0.16  | 0.07 | 4 | 10.7  |
| 448 | CAMPHOR (1R)                     | 464-49-3; 76-22-2                                 | C10H16O      | 152.24 | analgesic, antiinfective, antipruritic                                                                         | p7 4-3   | 1.63 | 3.26  | 4 | -0.22 | 0.04 | 4 | -16.2 |
| 449 | OBLIQUIN                         | 0                                                 | C14H12O4     | 244.25 |                                                                                                                | p4 4-3   | 1.63 | 3.26  | 4 | -0.33 | 0.04 | 4 | -25.7 |
| 450 | RHODOCLADONIC ACID               | 26984-15-6                                        | C15H10O8     | 318.24 |                                                                                                                | p1 8-2   | 1.58 | 7.53  | 4 | -0.03 | 0.09 | 4 | -2.1  |
| 451 | ROCELLIC ACID                    | 22139-54-4                                        | C17H32O4     | 300.44 |                                                                                                                | p1 10-2  | 1.58 | 7.53  | 4 | -0.06 | 0.05 | 4 | -4.1  |
| 452 | HYGROMYCIN B                     | 31282-04-9                                        | C20H37N3O13  | 527.53 | antibacterial, anthelmintic; LD5 ip (rat)<br>63mg/Kg                                                           | p6 4-2   | 1.53 | 2.76  | 4 | 0.15  | 0.02 | 4 | 9.9   |
| 453 | GLYCYRRHIZIC ACID, AMMONIUM SALT | 1405-86-3                                         | C41H69N3O16  | 860.02 | 11beta-hydroxysteroid dehydrogenase inhibitor,<br>antiinflammatory, expectorant,<br>antihaemorrhagic, anti-HIV | p8 8-7   | 1.41 | 3.60  | 4 | -0.52 | 0.13 | 4 | -43.6 |
| 454 | 7,4'-DIMETHOXYISOFLAVONE         | 0                                                 | C17H14O4     | 282.30 |                                                                                                                | p8 5-3   | 1.31 | 16.35 | 4 | 0.04  | 0.08 | 4 | 3.0   |
| 455 | 6,3'-DIMETHOXYFLAVONE            | 79786-40-6                                        | C17H14O4     | 282.30 |                                                                                                                | p9 8-6   | 1.27 | 13.51 | 4 | -0.08 | 0.11 | 4 | -5.6  |
| 456 | alpha-TOXICAROL (dl)             | 82-09-7                                           | C23H22O7     | 410.43 |                                                                                                                | p7 2-4   | 0.92 | 7.28  | 4 | 0.01  | 0.16 | 4 | 0.6   |
| 457 | 2-METHYL GRAMINE                 | 0                                                 | C12H16N2     | 188.27 |                                                                                                                | p4 2-4   | 0.92 | 7.28  | 4 | -0.11 | 0.16 | 4 | -7.5  |
| 458 | PIPERIC ACID                     | 5285-18-7                                         | C12H10O4     | 218.21 |                                                                                                                | p3 3-6   | 0.79 | 4.72  | 4 | -0.02 | 0.07 | 4 | -1.7  |

|     |                                                     |                                 |               |        |                                                                                   |         |       |       |   |       |      |   |        |
|-----|-----------------------------------------------------|---------------------------------|---------------|--------|-----------------------------------------------------------------------------------|---------|-------|-------|---|-------|------|---|--------|
| 459 | INDOLE-3-CARBINOL                                   | 700-06-1                        | C9H9NO        | 147.18 | antineoplastic; inhibitor of Amyloid-beta deposition                              | p5 1-5  | 0.77  | 4.37  | 4 | -0.40 | 0.12 | 4 | -31.7  |
| 460 | OXONITINE                                           | 0                               | C33H43NO12    | 645.71 |                                                                                   | p4 8-3  | 0.75  | 4.78  | 4 | 0.05  | 0.05 | 4 | 3.3    |
| 461 | 12a-HYDROXY-9-DEMETHYLMUNDUSERONE-8-CARBOXYLIC ACID | 0                               | C19H16O9      | 388.33 |                                                                                   | p4 8-4  | 0.54  | 6.13  | 4 | 0.06  | 0.02 | 4 | 4.1    |
| 462 | SINAPIC ACID                                        | 530-59-6                        | C11H12O5      | 224.22 |                                                                                   | p7 5-7  | 0.45  | 3.04  | 4 | 0.25  | 0.13 | 4 | 15.8   |
| 463 | XANTHONE                                            | 90-47-1                         | C13H8O2       | 196.21 |                                                                                   | p4 5-7  | 0.45  | 3.04  | 4 | 0.13  | 0.13 | 4 | 8.9    |
| 464 | PERSEITOL HEPTAACETATE                              | 19147-10-5                      | C21H30O14     | 506.46 |                                                                                   | p9 5-5  | 0.17  | 3.78  | 4 | -0.14 | 0.04 | 4 | -10.1  |
| 465 | CHOLECALCIFEROL                                     | 67-97-0                         | C27H44O       | 384.65 | vitamin D3                                                                        | p10 6-5 | 0.08  | 17.94 | 4 | -0.21 | 0.08 | 4 | -15.8  |
| 466 | AVOCADENE ACETATE                                   | 24607-09-8                      | C19H36O4      | 328.50 | antifungal, plant growth inhibitor                                                | p9 1-4  | -0.39 | 8.75  | 4 | -0.47 | 0.14 | 4 | -38.4  |
| 467 | STICTIC ACID                                        | 549-06-4                        | C19H14O9      | 386.32 |                                                                                   | P2 7-8  | -0.45 | 10.21 | 4 | 0.08  | 0.15 | 4 | 5.5    |
| 468 | BICUCULLINE(-) METHIODIDE                           | 55950-07-7                      | C21H20INO6    | 509.30 | GABAa antagonist                                                                  | p7 9-1  | -0.49 | 3.50  | 4 | -0.07 | 0.12 | 4 | -4.9   |
| 469 | EPICATECHIN                                         | 490-46-0                        | C15H14O6      | 290.28 | antioxidant                                                                       | p9 10-1 | -0.62 | 3.01  | 4 | -0.09 | 0.04 | 4 | -6.3   |
| 470 | ALOIN                                               | 5133-19-7                       | C21H22O10     | 434.40 | cathartic, laxative                                                               | p6 6-1  | -0.73 | 14.69 | 4 | -0.63 | 0.12 | 4 | -54.3  |
| 471 | CLOVANEDIOL DIACETATE                               | 0                               | C19H30O4      | 322.45 |                                                                                   | P2 10-6 | -0.83 | 15.10 | 4 | 0.55  | 0.08 | 4 | 31.9   |
| 472 | CHAULMOOGRIC ACID, ETHYL ESTER                      | 623-32-5                        | C20H36O2      | 308.51 | antilepreitic                                                                     | p6 7-6  | -0.95 | 4.76  | 4 | -0.15 | 0.02 | 4 | -10.8  |
| 473 | DIPTERYXIN                                          | 53948-01-9                      | C17H14O6      | 314.30 |                                                                                   | p1 6-3  | -1.01 | 12.29 | 4 | -0.31 | 0.14 | 4 | -24.3  |
| 474 | EPIGALLOCATECHIN 3,5-DIGALLATE                      | 0                               | C29H22O15     | 610.49 |                                                                                   | p9 8-3  | -1.19 | 4.93  | 4 | -0.23 | 0.04 | 4 | -17.5  |
| 475 | AJMALINE                                            | 4360-17-7                       | C20H26N2O2    | 326.44 | antiarrhythmic (Class Ia): inhibits glucose uptake by mitochondria, & PAF blocker | p3 10-6 | -1.24 | 6.91  | 4 | 0.10  | 0.08 | 4 | 6.9    |
| 476 | SALSOLINE                                           | 89-31-6                         | C11H15NO2     | 193.25 | antihypertensive, antihistamine                                                   | p9 8-5  | -1.38 | 13.01 | 4 | -0.01 | 0.09 | 4 | -0.9   |
| 477 | HYMECROMONE METHYL ETHER                            | 2555-28-4                       | C11H10O3      | 190.20 |                                                                                   | P2 9-2  | -1.44 | 21.29 | 4 | 0.26  | 0.05 | 4 | 16.6   |
| 478 | OSAJIN                                              | 482-53-1                        | C25H24O5      | 404.47 |                                                                                   | p2 2-3  | -1.77 | 15.55 | 4 | -1.06 | 0.54 | 4 | -108.2 |
| 479 | PICROTIN                                            | 21416-53-5                      | C15H18O7      | 310.31 | GABAa receptor antagonist                                                         | p5 3-5  | -1.94 | 5.37  | 4 | -0.20 | 0.17 | 4 | -14.8  |
| 480 | EPIAFZELECHIN (2R,3R)(-)                            | 24808-04-6                      | C15H14O5      | 274.28 |                                                                                   | p3 3-7  | -2.10 | 11.70 | 4 | -0.14 | 0.18 | 4 | -10.2  |
| 481 | MANDelic ACID, METHYL ESTER                         | 0                               | C9H10O3       | 166.18 |                                                                                   | p2 1-2  | -2.26 | 2.60  | 4 | 0.31  | 0.16 | 4 | 19.1   |
| 482 | CONESSINE                                           | 5913-82-6, 546-06-5 [conessine] | C24H40N2      | 356.60 | antiamebic, antibacterial, antineoplastic, anesthetic (local)                     | p9 8-4  | -2.33 | 11.69 | 4 | -0.14 | 0.07 | 4 | -10.4  |
| 483 | HIERACIN                                            | 1621-84-7                       | C15H10O7      | 302.24 |                                                                                   | p1 3-6  | -2.75 | 15.90 | 2 | 0.54  | 0.22 | 2 | 31.0   |
| 484 | EUPHOL                                              | 514-47-6                        | C30H50O       | 426.73 |                                                                                   | p9 8-7  | -2.84 | 9.90  | 4 | -0.29 | 0.04 | 4 | -22.5  |
| 485 | MENADIONE                                           | 58-27-5                         | C11H8O2       | 172.19 | prothrombogenic agent                                                             | p10 4-6 | -2.86 | 6.60  | 4 | 0.49  | 0.07 | 4 | 29.0   |
| 486 | AGMATINE SULFATE                                    | 2482-00-0                       | C5H16N4O4S    | 228.27 | NMDA blocker, alpha-2 adrenergic agonist; NO synthase inhibitor                   | p5 10-7 | -2.93 | 14.78 | 4 | 0.21  | 0.17 | 4 | 13.5   |
| 487 | MUNDULONE ACETATE                                   | 0                               | C28H28O7      | 476.53 |                                                                                   | p6 7-3  | -3.19 | 6.82  | 4 | 0.37  | 0.04 | 4 | 22.6   |
| 488 | CANAVANINE                                          | 543-38-4                        | C5H12N4O3     | 176.18 | NO synthase inhibitor                                                             | p5 5-6  | -3.40 | 5.55  | 4 | 0.29  | 0.05 | 4 | 18.4   |
| 489 | CARNITINE (dl) HYDROCHLORIDE                        | 461-06-3                        | C7H16ClNO3    | 197.66 | antihyperlipoproteinemic, gastric/ pancreatic secretion stimulant                 | p8 6-1  | -3.41 | 16.17 | 4 | -0.79 | 0.04 | 4 | -73.4  |
| 490 | RIBOFLAVIN 5-PHOSPHATE SODIUM                       | 130-40-5                        | C17H20N4NaO9P | 478.33 | vitamin, enzyme cofactor                                                          | p10 8-7 | -3.47 | 5.89  | 4 | -0.32 | 0.08 | 4 | -25.0  |
| 491 | MANGIFERIN                                          | 4773-96-0                       | C19H18O11     | 422.35 | MAO inhibitor, immunostimulant                                                    | p1 3-2  | -3.49 | 11.57 | 4 | 0.18  | 0.20 | 4 | 11.5   |
| 492 | N-METHYLISOLEUCINE                                  | 5125-98-8                       | C7H15NO2      | 145.20 |                                                                                   | p9 9-1  | -3.51 | 17.39 | 4 | -0.07 | 0.05 | 4 | -5.2   |
| 493 | ACONITIC ACID                                       | 585-84-2                        | C6H6O6        | 174.11 |                                                                                   | P2 7-7  | -3.59 | 5.97  | 4 | -0.01 | 0.10 | 4 | -0.7   |
| 494 | 4-METHYLESCULETIN                                   | 0                               | C10H8O4       | 192.17 |                                                                                   | p8 2-7  | -3.64 | 20.21 | 4 | 0.01  | 0.13 | 4 | 0.7    |
| 495 | LANOSTEROL ACETATE                                  | 0                               | C32H52O2      | 468.77 |                                                                                   | p3 1-2  | -3.78 | 4.86  | 4 | -0.04 | 0.16 | 4 | -2.8   |
| 496 | DIFFRACTAIC ACID                                    | 436-32-8                        | C20H22O7      | 374.39 |                                                                                   | p1 5-6  | -3.80 | 8.68  | 4 | 0.91  | 0.21 | 4 | 46.7   |
| 497 | SITOSTERYL ACETATE                                  | 0                               | C31H52O2      | 456.76 |                                                                                   | p4 7-2  | -3.86 | 7.26  | 4 | -0.17 | 0.12 | 4 | -12.4  |
| 498 | PANGAMIC ACID SODIUM                                | 20858-86-0                      | C10H18NNaO8   | 303.25 |                                                                                   | p8 8-4  | -4.04 | 4.03  | 4 | -0.69 | 0.11 | 4 | -61.0  |
| 499 | METHYL 7-DESHYDROXYPYROGALLIN-4-CARBOXYLATE         | 77-41-8                         | C13H10O6      | 262.22 |                                                                                   | p3 9-3  | -4.08 | 8.73  | 4 | 0.16  | 0.16 | 4 | 10.5   |
| 500 | AMPHOTERICIN B                                      | 1397-89-3                       | C47H73NO17    | 924.10 | antifungal                                                                        | p7 9-3  | -4.47 | 6.51  | 4 | 0.11  | 0.06 | 4 | 7.1    |
| 501 | VERBENALIN                                          | 548-37-8                        | C17H24O10     | 388.37 | cell growth inhibitor, coagulant                                                  | p8 9-3  | -4.48 | 7.07  | 4 | 2.45  | 1.77 | 4 | 81.7   |
| 502 | AGARIC ACID                                         | 666-99-9                        | C22H40O7      | 416.56 | antiperspirant                                                                    | p3 9-5  | -4.50 | 6.51  | 4 | 0.30  | 0.07 | 4 | 18.9   |
| 503 | CEDROL                                              | 77-53-2                         | C15H26O       | 222.37 | acaricide                                                                         | p7 6-4  | -4.53 | 8.49  | 4 | -0.11 | 0.07 | 4 | -7.7   |
| 504 | SENNOSIDE A                                         | 81-27-6                         | C42H38O20     | 862.76 | cathartic                                                                         | p5 6-2  | -4.71 | 12.19 | 4 | -0.08 | 0.11 | 4 | -6.1   |
| 505 | PHYSOSTIGMINE SALICYLATE                            | 57-64-7, 57-47-6                | C22H27N3O5    | 413.48 | cholinergic, anticholinesterase, mitotic                                          | p10 9-2 | -4.89 | 6.86  | 4 | -0.12 | 0.04 | 4 | -8.6   |
| 506 | PODOTOTARIN                                         | 0                               | C40H58O2      | 570.91 |                                                                                   | p6 9-2  | -4.91 | 3.66  | 4 | 0.04  | 0.06 | 4 | 2.5    |

|     |                                            |                                                               |               |        |                                                               |          |        |       |   |       |      |   |       |
|-----|--------------------------------------------|---------------------------------------------------------------|---------------|--------|---------------------------------------------------------------|----------|--------|-------|---|-------|------|---|-------|
| 507 | CHAULMOGRIC ACID                           | 502-30-7                                                      | C18H32O2      | 280.45 | antibacterial (mycobacteria), antileprotic                    | p1 5-1   | -4.94  | 10.64 | 4 | -0.58 | 0.08 | 4 | -49.1 |
| 508 | GALANGIN 3-O-METHYL ETHER                  | 6665-74-3                                                     | C16H12O5      | 284.27 |                                                               | p5 2-8   | -5.04  | 2.62  | 4 | -0.54 | 0.10 | 4 | -45.3 |
| 509 | 2',4'-DIHYDROXY-3,4',6'-TRIMETHOXYCHALCONE | 112572-59-5                                                   | C18H18O6      | 330.34 |                                                               | p7 4-6   | -5.12  | 7.47  | 4 | 0.09  | 0.03 | 4 | 5.9   |
| 510 | PISCIDIC ACID                              | 35388-57-9                                                    | C11H12O7      | 256.21 |                                                               | p4 4-6   | -5.12  | 7.47  | 4 | -0.03 | 0.03 | 4 | -1.7  |
| 511 | CORALYNE CHLORIDE                          | 38989-38-7                                                    | C22H22ClNO4   | 399.88 | cytostatic, intercalating agent                               | p9 2-1   | -5.22  | 5.70  | 4 | -0.31 | 0.06 | 4 | -23.6 |
| 512 | ANETHOLE                                   | 4180-23-8                                                     | C10H12O       | 148.21 | expectorant, gastric stimulant, insecticide                   | p10 10-6 | -5.30  | 5.83  | 4 | -0.08 | 0.06 | 4 | -5.8  |
| 513 | CAPSANTHIN                                 | 465-42-9                                                      | C40H56O3      | 584.89 | antineoplastic                                                | p3 8-3   | -5.31  | 4.63  | 4 | -0.08 | 0.05 | 4 | -5.5  |
| 514 | EMBELIN                                    | 0                                                             | C17H26O4      | 294.39 | anthelmintic, oral contraceptive                              | p6 4-5   | -5.38  | 6.03  | 4 | 0.13  | 0.07 | 4 | 8.8   |
| 515 | GLUCOSAMINIC ACID                          | 3646-68-2                                                     | C6H13NO6      | 195.17 |                                                               | p7 4-5   | -5.48  | 1.58  | 4 | 0.22  | 0.03 | 4 | 13.9  |
| 516 | FUMARPROTOCETRARIC ACID                    | 489-50-9                                                      | C22H16O12     | 472.37 |                                                               | p4 4-5   | -5.48  | 1.58  | 4 | 0.10  | 0.03 | 4 | 6.9   |
| 517 | SPHONDIN                                   | 483-66-9                                                      | C12H8O4       | 216.20 |                                                               | p7 9-5   | -5.49  | 8.01  | 4 | 0.32  | 0.09 | 4 | 20.1  |
| 518 | CELLOBIOSE [D(+)]                          | 528-50-7                                                      | C12H22O11     | 342.30 |                                                               | p1 4-5   | -5.56  | 11.11 | 4 | 0.91  | 0.15 | 4 | 46.9  |
| 519 | PHLORETIN                                  | 60-82-2                                                       | C15H14O5      | 274.28 |                                                               | p1 9-1   | -5.73  | 13.60 | 4 | -0.15 | 0.06 | 4 | -10.8 |
| 520 | PSEUDO-ANISATIN                            | 31090-37-6                                                    | C15H22O6      | 298.34 | GABA antagonist                                               | p9 9-6   | -5.73  | 8.27  | 4 | 0.14  | 0.09 | 4 | 9.2   |
| 521 | 2,6-DIMETHOXYQUINONE                       | 35069-70-6                                                    | C8H8O4        | 168.15 | antibacterial, induces dermatitis, mutagen                    | p9 7-3   | -5.86  | 5.05  | 4 | -0.06 | 0.05 | 4 | -4.3  |
| 522 | KHAYANTHONE                                | 25279-68-9                                                    | C32H42O9      | 570.69 |                                                               | p3 9-4   | -5.94  | 1.06  | 4 | -0.01 | 0.07 | 4 | -0.3  |
| 523 | SPECTINOMYCIN HYDROCHLORIDE                | 22189-32-8, 21736-83-4 [anhydrous], 1695-77-8 [spectinomycin] | C14H26Cl2N2O7 | 405.28 | antibacterial                                                 | p10 6-3  | -6.16  | 18.84 | 4 | -0.51 | 0.13 | 4 | -42.8 |
| 524 | 3-PINANONE OXIME                           | 0                                                             | C10H17NO      | 167.25 |                                                               | p6 7-4   | -6.18  | 3.64  | 4 | 0.02  | 0.11 | 4 | 1.5   |
| 525 | DESACETYLCOLFORSIN                         | 64657-20-1                                                    | C20H32O6      | 368.47 |                                                               | p9 9-4   | -6.53  | 4.67  | 4 | 0.22  | 0.03 | 4 | 14.3  |
| 526 | d-LIMONENE                                 | 138-86-7                                                      | C10H16        | 136.24 | skin irritant, sensitizer                                     | p6 6-2   | -6.54  | 13.29 | 4 | -0.21 | 0.12 | 4 | -15.7 |
| 527 | 2',3'-DIHYDROXY-4,4',6'-TRIMETHOXYCHALCONE | 38186-71-9                                                    | C18H18O6      | 330.34 |                                                               | p1 2-1   | -6.64  | 4.60  | 4 | -0.29 | 0.13 | 4 | -22.2 |
| 528 | NIACIN                                     | 59-67-6                                                       | C6H5NO2       | 123.11 | antihyperlipidemic, vitamin (enzyme cofactor)                 | p6 3-7   | -6.70  | 6.44  | 4 | 0.08  | 0.09 | 4 | 5.3   |
| 529 | ARECOLINE HYDROBROMIDE                     | 300-08-3, 63-75-2                                             | C8H14BrNO2    | 236.11 | anthelmintic (Cestodes), hypotensive, cathartic               | p7 1-1   | -6.72  | 12.00 | 4 | -0.47 | 0.05 | 4 | -38.7 |
| 530 | PRENYLETIN                                 | 15870-91-4                                                    | C14H14O4      | 246.27 |                                                               | p4 1-1   | -6.72  | 12.00 | 4 | -0.59 | 0.05 | 4 | -50.0 |
| 531 | STRYCHNINE METHIODIDE                      | 0                                                             | C22H25IN2O2   | 476.36 | neuromuscular blocker                                         | P2 7-2   | -6.90  | 10.25 | 4 | 0.58  | 0.18 | 4 | 33.3  |
| 532 | CARYOPHYLLENE [t(-)]                       | 87-44-5                                                       | C14H22        | 190.33 |                                                               | p1 8-3   | -6.90  | 16.44 | 4 | 0.32  | 0.16 | 4 | 20.0  |
| 533 | ISOPOMIFERIN                               | 0                                                             | C25H24O6      | 420.47 |                                                               | p1 10-3  | -6.90  | 16.44 | 4 | -0.07 | 0.15 | 4 | -5.3  |
| 534 | alpha-HYDROXYDEOXYCHOLIC ACID              | 83-49-8                                                       | C24H40O4      | 392.58 |                                                               | p1 5-2   | -6.93  | 15.75 | 4 | -0.52 | 0.10 | 4 | -43.0 |
| 535 | 1R,2S-PHENYLPROPYLAMINE                    | 14838-15-4                                                    | C9H13NO       | 151.21 | decongestant                                                  | p6 8-5   | -7.00  | 2.40  | 4 | -0.16 | 0.08 | 4 | -12.0 |
| 536 | ABSCISIC ACID (cis,trans; +/-)             | 14375-45-2                                                    | C15H20O4      | 264.32 | abscission-accelérant; kinetin nucleotide synthesis inhibitor | p1 6-5   | -7.09  | 30.70 | 4 | 0.65  | 0.45 | 3 | 36.3  |
| 537 | PALMIDROL                                  | 544-31-0                                                      | C18H37NO2     | 299.50 | antiinflammatory                                              | p6 5-6   | -7.35  | 5.77  | 4 | 0.05  | 0.07 | 4 | 3.5   |
| 538 | ISOFORMONONETIN                            | 486-63-5                                                      | C16H12O4      | 268.27 |                                                               | p2 4-1   | -7.36  | 15.21 | 4 | -0.28 | 0.22 | 4 | -21.7 |
| 539 | EVOXINE                                    | 522-11-2                                                      | C18H21NO6     | 347.37 |                                                               | p1 3-1   | -7.37  | 7.96  | 4 | 0.11  | 0.26 | 3 | 7.0   |
| 540 | SPERMINE                                   | 71-44-3                                                       | C10H26N4      | 202.35 | immune modulator                                              | p1 5-3   | -7.42  | 7.35  | 4 | -0.43 | 0.20 | 4 | -35.1 |
| 541 | BILIRUBIN                                  | 635-65-4                                                      | C33H36N4O6    | 584.68 |                                                               | p1 8-4   | -7.55  | 9.31  | 4 | -0.01 | 0.11 | 4 | -0.9  |
| 542 | MUUROLLADIE-3-ONE                          | 0                                                             | C15H22O       | 218.34 |                                                               | p1 10-4  | -7.55  | 9.31  | 4 | -0.02 | 0.07 | 4 | -1.7  |
| 543 | MANGOSTIN TRIMETHYL ETHER                  | 0                                                             | C27H32O6      | 452.55 |                                                               | p3 5-6   | -8.08  | 6.81  | 4 | 0.00  | 0.03 | 4 | -0.1  |
| 544 | DIHYDROJASMONIC ACID, METHYL ESTER         | 24851-98-7                                                    | C13H22O3      | 226.32 | plant growth regulator                                        | p8 3-2   | -8.77  | 11.62 | 4 | -0.06 | 0.07 | 4 | -4.0  |
| 545 | ENOXOLONE                                  | 471-53-4                                                      | C30H46O4      | 470.70 | antitussive, antiinflammatory, antibacterial                  | p6 3-6   | -8.81  | 2.02  | 4 | -0.07 | 0.05 | 4 | -5.3  |
| 546 | CHRYSAROBIN                                | 491-58-7                                                      | C15H12O3      | 240.26 |                                                               | p7 10-6  | -8.96  | 6.12  | 4 | 0.48  | 0.07 | 4 | 28.2  |
| 547 | GENKWANIN                                  | 437-64-9                                                      | C16H12O5      | 284.27 |                                                               | p8 6-2   | -9.13  | 28.74 | 4 | -0.83 | 0.06 | 4 | -77.7 |
| 548 | ADENINE                                    | 73-24-5                                                       | C5H5N5        | 135.13 | Vitamin B4                                                    | p10 2-5  | -9.27  | 4.53  | 4 | -0.08 | 0.12 | 4 | -5.9  |
| 549 | EPITHEAFLAVIC ACID                         | 0                                                             | C21H16O10     | 428.36 |                                                               | p1 1-8   | -9.36  | 20.34 | 4 | 0.10  | 0.04 | 4 | 6.9   |
| 550 | TOTAROL                                    | 511-15-9                                                      | C20H30O       | 286.46 |                                                               | p2 4-6   | -9.45  | 5.71  | 4 | -0.36 | 0.10 | 4 | -28.4 |
| 551 | 3,4',5,6,7-PENTAMETHOXYFLAVONE             | 4472-73-5                                                     | C20H20O7      | 372.38 |                                                               | p3 8-6   | -9.57  | 2.71  | 4 | 0.24  | 0.04 | 4 | 15.6  |
| 552 | NIACINAMIDE                                | 98-92-0                                                       | C6H6N2O       | 122.13 | Vitamin B3; enzyme cofactor; anti-pellagra                    | p6 10-7  | -9.59  | 6.64  | 4 | -0.05 | 0.05 | 4 | -3.6  |
| 553 | LEVODOPA                                   | 59-92-7                                                       | C9H11NO4      | 197.19 | antiparkinsonian                                              | p7 6-1   | -9.67  | 12.17 | 4 | -0.21 | 0.16 | 4 | -15.4 |
| 554 | PAEONOL                                    | 552-41-0                                                      | C9H10O3       | 166.18 | antibacterial                                                 | p2 3-7   | -10.37 | 19.61 | 4 | 0.01  | 0.12 | 4 | 0.8   |
| 555 | CYCLOSERINE (D)                            | 68-41-7                                                       | C3H6N2O2      | 102.09 | antibacterial (tuberculostatic)                               | p10 1-1  | -10.45 | 9.82  | 4 | -0.38 | 0.13 | 4 | -30.0 |
| 556 | CINCHONINE                                 | 118-10-5                                                      | C19H22N2O     | 294.40 | antimalarial                                                  | p8 5-4   | -10.47 | 18.05 | 4 | 0.01  | 0.12 | 4 | 0.4   |

|     |                                          |                                           |                |         |                                                                                 |          |        |       |   |       |      |   |       |
|-----|------------------------------------------|-------------------------------------------|----------------|---------|---------------------------------------------------------------------------------|----------|--------|-------|---|-------|------|---|-------|
| 557 | VERATRIC ACID                            | 93-07-2                                   | C9H10O4        | 182.18  |                                                                                 | p9 4-4   | -10.65 | 2.87  | 4 | -0.09 | 0.02 | 4 | -6.7  |
| 558 | ERGOSTEROL ACETATE                       | 2418-45-3                                 | C32H50O2       | 466.75  |                                                                                 | p5 8-1   | -10.68 | 11.05 | 4 | 0.06  | 0.12 | 4 | 3.7   |
| 559 | DIFUCOL HEXAMETHYL ETHER                 | 14262-07-8                                | C18H22O6       | 334.37  |                                                                                 | p3 4-7   | -10.90 | 5.62  | 4 | 0.08  | 0.09 | 4 | 5.1   |
| 560 | CORTISONE                                | 53-06-5                                   | C21H28O5       | 360.45  | antiinflammatory, glucocorticoid                                                | p6 2-6   | -10.93 | 6.03  | 4 | -0.17 | 0.07 | 4 | -12.8 |
| 561 | DEOXYSAPPANONE B 7,3'-DIMETHYL ETHER     | 0                                         | C18H18O5       | 314.34  |                                                                                 | p5 9-2   | -11.00 | 6.96  | 4 | 0.03  | 0.04 | 4 | 2.2   |
| 562 | 8-HYDROXYCARAPINIC ACID                  | 0                                         | C26H30O8       | 470.52  |                                                                                 | p1 6-7   | -11.03 | 10.14 | 4 | 1.43  | 0.22 | 4 | 63.0  |
| 563 | 2',2'-BISEPIGALLOECATECHIN DIGALLATE     | 0                                         | C44H34O22      | 914.75  |                                                                                 | p6 1-1   | -11.23 | 5.23  | 4 | -0.51 | 0.10 | 4 | -42.3 |
| 564 | 7-AMINOCEPHALOSPORANIC ACID              | 957-68-6                                  | C10H12N2O5S    | 272.28  |                                                                                 | p1 3-3   | -11.44 | 6.56  | 4 | 0.19  | 0.26 | 4 | 12.1  |
| 565 | KHELLIN                                  | 82-02-0                                   | C14H12O5       | 260.25  | vasodilator (coronary), photosensitizer                                         | p6 4-6   | -11.76 | 6.37  | 4 | 0.22  | 0.07 | 4 | 14.1  |
| 566 | POLYMYXIN B SULFATE                      | 1405-20-5, 1404-26-8                      | C56H100N16O17S | 1301.58 | antibacterial                                                                   | p10 1-3  | -11.86 | 13.49 | 4 | -0.20 | 0.12 | 4 | -15.1 |
| 567 | DIHYDROFOLIC ACID                        | 4033-27-6                                 | C19H21N7O6     | 443.42  | antidote to methotrexate toxicity                                               | p7 1-3   | -11.92 | 5.99  | 4 | -0.36 | 0.07 | 4 | -28.7 |
| 568 | XYLOCARPUS A                             | 0                                         | C31H38O11      | 586.64  |                                                                                 | p4 1-3   | -11.92 | 5.99  | 4 | -0.48 | 0.07 | 4 | -39.2 |
| 569 | PIPERINE                                 | 94-62-2                                   | C17H19NO3      | 285.35  | analeptic, antibacterial                                                        | p10 8-5  | -12.09 | 6.44  | 4 | 0.03  | 0.07 | 4 | 2.1   |
| 570 | BRAZILEIN                                | 600-76-0                                  | C16H12O5       | 284.27  |                                                                                 | p6 8-3   | -12.20 | 6.49  | 4 | 0.03  | 0.04 | 4 | 2.2   |
| 571 | SPIRAMYCIN                               | 8025-81-8                                 | C43H74N2O14    | 843.07  | antibacterial                                                                   | p10 10-5 | -12.26 | 13.32 | 4 | -0.17 | 0.07 | 4 | -12.2 |
| 572 | MEROGEDUNIN                              | 0                                         | C21H28O4       | 344.45  |                                                                                 | p1 7-4   | -12.28 | 11.90 | 4 | -0.50 | 0.05 | 3 | -41.1 |
| 573 | ICARIIN                                  | 489-32-7                                  | C33H40O15      | 676.68  | hepatoprotective                                                                | p4 10-1  | -12.33 | 2.62  | 4 | -0.22 | 0.06 | 4 | -16.4 |
| 574 | LEVOTHYROXINE                            | 51-48-9                                   | C15H11I4NO4    | 776.88  | antihypercholesterimic, thymomimetic                                            | p10 8-2  | -12.41 | 11.60 | 4 | -0.03 | 0.01 | 4 | -2.2  |
| 575 | TOTAROL-19-CARBOXYLIC ACID, METHYL ESTER | 0                                         | C21H30O3       | 330.47  |                                                                                 | p8 4-6   | -12.62 | 27.41 | 4 | 0.37  | 0.12 | 4 | 22.4  |
| 576 | PURPUROGALLIN                            | 569-77-7                                  | C11H8O5        | 220.18  | xanthine oxidase inhibitor, antioxidant                                         | p3 3-2   | -12.64 | 8.05  | 4 | -0.01 | 0.10 | 4 | -0.7  |
| 577 | 18alpha-GLYCYRRHETINIC ACID              | 0                                         | C30H46O4       | 470.70  | antiinflammatory                                                                | p5 4-6   | -12.69 | 1.33  | 4 | -0.01 | 0.05 | 4 | -0.5  |
| 578 | ISOPEONOL                                | 493-33-4                                  | C9H10O3        | 166.18  |                                                                                 | p7 3-7   | -12.83 | 6.96  | 4 | 0.03  | 0.07 | 4 | 2.3   |
| 579 | N-METHYLBENZYLAMINE HYDROCHLORIDE        | 13426-94-3, 103-67-3(base)                | C8H12ClN       | 157.64  |                                                                                 | p4 3-7   | -12.83 | 6.96  | 4 | -0.08 | 0.07 | 4 | -5.7  |
| 580 | PHYTOL                                   | 0                                         | C19H38O        | 282.51  |                                                                                 | p3 6-2   | -12.94 | 12.06 | 4 | -0.42 | 0.12 | 4 | -33.6 |
| 581 | BAICALIN                                 | 21967-41-9                                | C21H18O11      | 446.37  | diuretic                                                                        | p1 8-8   | -13.01 | 3.92  | 4 | -0.23 | 0.21 | 4 | -17.1 |
| 582 | SMILAGENIN ACETATE                       | 0                                         | C29H46O4       | 458.69  |                                                                                 | p1 1-4   | -13.03 | 6.86  | 4 | -0.11 | 0.13 | 4 | -7.9  |
| 583 | IRIDIN                                   | 491-74-7                                  | C24H26O13      | 522.47  |                                                                                 | p5 3-2   | -13.32 | 6.11  | 4 | -0.14 | 0.08 | 4 | -10.0 |
| 584 | ADENOSINE                                | 58-61-7                                   | C10H13N5O4     | 267.25  | antiarrhythmic, cardiac depressant                                              | p3 10-5  | -13.39 | 5.77  | 4 | 0.02  | 0.09 | 4 | 1.5   |
| 585 | IRIGENOL                                 | 4935-93-7                                 | C15H10O8       | 318.24  |                                                                                 | p5 7-3   | -13.42 | 14.28 | 4 | 0.01  | 0.13 | 4 | 0.7   |
| 586 | CHRYSANTHEMIC ACID                       | 10453-89-1                                | C10H16O2       | 168.24  | esters as insecticide                                                           | p8 7-5   | -13.45 | 15.60 | 4 | -0.32 | 0.12 | 4 | -24.6 |
| 587 | DUARTIN, DIMETHYL ETHER                  | 0                                         | C20H24O6       | 360.41  |                                                                                 | p5 5-4   | -13.50 | 4.27  | 4 | -0.22 | 0.07 | 4 | -16.4 |
| 588 | alpha-TOCHOPHERYL ACETATE                | 58-95-7                                   | C31H52O3       | 472.76  | vitamin E                                                                       | p7 6-2   | -13.55 | 13.85 | 4 | -0.21 | 0.17 | 4 | -15.8 |
| 589 | NOVOBIOCIN SODIUM                        | 1476-53-5, 303-81-1                       | C31H35N2NaO11  | 634.62  | antibacterial                                                                   | p1 3-8   | -13.64 | 14.42 | 4 | 0.10  | 0.12 | 4 | 6.5   |
| 590 | MENAQUINONE-4                            | 0                                         | C21H24O2       | 308.42  | antioxidant, alkaline phosphatase enhancer                                      | p7 8-5   | -13.76 | 12.84 | 4 | 0.06  | 0.13 | 4 | 4.1   |
| 591 | 5alpha-ANDROSTAN-3,17-DIONE              | 0                                         | C19H28O2       | 288.43  | androgen                                                                        | p5 5-8   | -13.88 | 11.20 | 4 | 0.00  | 0.04 | 4 | -0.1  |
| 592 | CHOLESTERYL BENZOATE                     | 604-32-0                                  | C34H50O2       | 490.78  |                                                                                 | p6 4-4   | -14.05 | 6.04  | 4 | 0.08  | 0.06 | 4 | 5.3   |
| 593 | CHLORTETRACYCLINE HYDROCHLORIDE          | 64-72-2                                   | C22H24Cl2N2O8  | 515.35  | antibacterial, antiamebic, Ca chelator, hepatotoxic; inhibits protein synthesis | p7 10-3  | -14.12 | 2.48  | 4 | -0.03 | 0.05 | 4 | -2.0  |
| 594 | 4-ACETOXYPHENOL                          | 3233-32-7                                 | C8H8O3         | 152.15  | antioxidant                                                                     | p3 7-1   | -14.14 | 5.77  | 4 | 0.21  | 0.04 | 4 | 13.4  |
| 595 | MUCIC ACID                               | 526-99-8                                  | C6H10O8        | 210.14  |                                                                                 | p8 4-3   | -14.31 | 11.79 | 4 | -0.19 | 0.08 | 4 | -13.8 |
| 596 | KYNURENINE                               | 0                                         | C10H12N2O3     | 208.22  |                                                                                 | P2 10-5  | -14.37 | 9.37  | 4 | 0.48  | 0.24 | 4 | 28.1  |
| 597 | COTARNINE CHLORIDE                       | 10018-19-6, 82-54-2                       | C12H14ClNO3    | 255.70  | vasoconstrictor                                                                 | p4 10-3  | -14.54 | 8.04  | 4 | -0.20 | 0.08 | 4 | -15.2 |
| 598 | PRIMULETIN                               | 491-78-1                                  | C15H10O3       | 238.25  |                                                                                 | p4 8-2   | -14.55 | 11.94 | 4 | 0.05  | 0.04 | 4 | 3.1   |
| 599 | SPARTEINE SULFATE                        | 6160-12-9, 299-39-8                       | C15H28N2O4S    | 332.47  | oxytocic                                                                        | p7 7-1   | -14.55 | 7.38  | 4 | 0.04  | 0.16 | 4 | 3.0   |
| 600 | ELLAGIC ACID                             | 476-66-4                                  | C14H6O8        | 302.20  | hemostatic, antineoplastic, antimutagenic                                       | p7 8-1   | -14.62 | 5.34  | 4 | -0.05 | 0.06 | 4 | -3.6  |
| 601 | SOLIDAGENONE                             | 23534-56-7                                | C20H28O3       | 316.44  |                                                                                 | p2 1-7   | -14.64 | 11.96 | 4 | 0.73  | 0.26 | 4 | 39.6  |
| 602 | alpha-TOCHOPHEROL                        | 59-02-9                                   | C29H50O2       | 430.72  | vitamin E, antioxidant                                                          | P2 10-4  | -14.67 | 19.84 | 4 | 0.21  | 0.27 | 4 | 13.8  |
| 603 | N-METHYLANTHRANILIC ACID                 | 119-68-6                                  | C8H9NO2        | 151.17  |                                                                                 | P2 8-4   | -14.80 | 16.62 | 4 | 0.20  | 0.04 | 4 | 13.0  |
| 604 | GALANGIN                                 | 548-83-4                                  | C15H10O5       | 270.24  | CYP1A1 inhibitor                                                                | P2 10-1  | -14.90 | 21.99 | 4 | 0.39  | 0.07 | 4 | 23.6  |
| 605 | IRETOL                                   | 0                                         | C7H8O4         | 156.14  |                                                                                 | p6 1-4   | -15.02 | 9.00  | 4 | -0.32 | 0.07 | 4 | -24.7 |
| 606 | IRIGENIN                                 | 548-76-5                                  | C18H16O8       | 360.32  |                                                                                 | p5 2-2   | -15.03 | 12.03 | 4 | -0.43 | 0.14 | 4 | -34.9 |
| 607 | QUININE SULFATE                          | 6119-70-6, 804-63-7 [anhydrous], 130-95-0 | C20H26N2O6S    | 422.50  | antimalarial, skeletal muscle relaxant                                          | p10 3-3  | -15.40 | 5.39  | 4 | -0.12 | 0.06 | 4 | -8.7  |

|     |                                                            |                     |              |         |                                                                     |         |        |       |   |       |      |   |       |
|-----|------------------------------------------------------------|---------------------|--------------|---------|---------------------------------------------------------------------|---------|--------|-------|---|-------|------|---|-------|
| 608 | RHODINYL ACETATE                                           | 0                   | C12H22O2     | 198.31  |                                                                     | P2 9-7  | -15.58 | 8.00  | 4 | 0.17  | 0.15 | 4 | 10.9  |
| 609 | AMYGDALIN                                                  | 29883-15-6          | C20H27NO11   | 457.44  | antiinflammatory, experimental antineoplastic                       | p8 6-7  | -15.61 | 20.76 | 4 | 0.07  | 0.04 | 4 | 4.8   |
| 610 | UMBELLIFERONE                                              | 93-35-6             | C9H6O3       | 162.15  | antifungal, phytoalexin                                             | p2 2-5  | -15.67 | 2.30  | 4 | -0.92 | 0.57 | 4 | -88.9 |
| 611 | IRIGENIN, DIBENZYL ETHER                                   | 0                   | C32H28O8     | 540.58  |                                                                     | p9 8-2  | -15.69 | 8.14  | 4 | 0.00  | 0.07 | 4 | 0.0   |
| 612 | 15-NORCARYOPHYLLEN-3-ONE                                   | 0                   | C14H22O      | 206.33  |                                                                     | p6 8-4  | -15.72 | 5.09  | 4 | -0.05 | 0.11 | 4 | -3.6  |
| 613 | S-ISOCORYDINE (+)                                          | 475-67-2            | C20H23NO4    | 341.41  | sedative, cholinergic                                               | p1 9-4  | -15.72 | 13.54 | 4 | -0.56 | 0.99 | 4 | -47.4 |
| 614 | DICTAMNINE                                                 | 484-29-7            | C12H9NO2     | 199.21  |                                                                     | p3 3-4  | -15.89 | 10.75 | 4 | 0.06  | 0.03 | 4 | 3.8   |
| 615 | METHYL 7-DESOXYPURPURUGALLIN-7-CARBOXYLATE TRIMETHYL ETHER | 0                   | C16H16O6     | 304.30  |                                                                     | p9 3-3  | -15.95 | 3.03  | 4 | 0.00  | 0.08 | 4 | 0.1   |
| 616 | PERILLIC ACID (-)                                          | 7694-45-3           | C10H14O2     | 166.22  | inhibits posttranslational cys isoprenylation, blocks G-protein     | p5 10-6 | -16.19 | 10.71 | 4 | 0.14  | 0.16 | 4 | 8.9   |
| 617 | MELIBIOSE                                                  | 585-99-9            | C12H22O11    | 342.30  |                                                                     | p6 7-2  | -16.19 | 7.01  | 4 | -0.06 | 0.07 | 4 | -4.0  |
| 618 | N-ACETYLMURAMIC ACID                                       | 10597-89-4          | C11H19NO8    | 293.28  |                                                                     | p6 2-3  | -16.52 | 6.87  | 4 | -0.11 | 0.08 | 4 | -8.2  |
| 619 | DIGITONIN                                                  | 11024-24-1          | C56H92O29    | 1229.34 |                                                                     | p8 4-2  | -16.58 | 11.21 | 4 | -0.12 | 0.03 | 4 | -8.8  |
| 620 | MELEZITOSE                                                 | 0                   | C18H32O16    | 504.45  |                                                                     | p9 3-1  | -16.81 | 5.47  | 4 | -0.18 | 0.06 | 4 | -13.0 |
| 621 | CHRYSANTHEMYL ALCOHOL                                      | 5617-92-5           | C10H18O      | 154.25  |                                                                     | p9 4-1  | -16.89 | 6.13  | 4 | -0.13 | 0.02 | 4 | -9.5  |
| 622 | 7,2'-DIHYDROXYFLAVONE                                      | 77298-66-9          | C15H10O4     | 254.24  | antihaemorrhagic                                                    | p8 5-8  | -16.96 | 7.55  | 4 | 0.19  | 0.09 | 4 | 12.6  |
| 623 | gamma-AMINOBUTYRIC ACID                                    | 56-12-2             | C4H9NO2      | 103.12  | antihypertensive                                                    | p6 5-5  | -17.05 | 6.18  | 4 | 0.04  | 0.03 | 4 | 2.6   |
| 624 | NONIC ACID                                                 | 0                   | C9H16O4      | 188.23  |                                                                     | p5 8-3  | -17.10 | 4.83  | 4 | 0.06  | 0.03 | 4 | 3.9   |
| 625 | 7-METHOXYCHROMONE                                          | 0                   | C10H8O3      | 176.17  |                                                                     | p3 10-1 | -17.15 | 5.76  | 4 | -0.34 | 0.04 | 4 | -26.1 |
| 626 | TETRACYCLINE HYDROCHLORIDE                                 | 64-75-5, 60-54-8    | C22H25ClN2O8 | 480.91  | antibacterial, antiamebic, antirickettsial                          | p10 8-3 | -17.26 | 6.52  | 4 | -0.31 | 0.02 | 4 | -24.3 |
| 627 | LACTOBIONIC ACID                                           | 96-82-2             | C12H22O12    | 358.30  | food additive                                                       | p3 7-2  | -17.48 | 3.56  | 4 | -0.35 | 0.09 | 4 | -27.5 |
| 628 | GOSSYPETIN                                                 | 489-35-0            | C15H10O8     | 318.24  |                                                                     | p5 5-2  | -17.52 | 7.12  | 4 | -0.04 | 0.08 | 4 | -2.6  |
| 629 | MYOSMINE                                                   | 532-12-7            | C9H10N2      | 146.19  | mitogen                                                             | p6 5-3  | -17.55 | 3.79  | 4 | 0.07  | 0.03 | 4 | 4.5   |
| 630 | JUGLONE                                                    | 481-39-0            | C10H6O3      | 174.16  | antineoplastic, antifungal                                          | p7 8-6  | -17.67 | 5.66  | 4 | 0.17  | 0.04 | 4 | 11.2  |
| 631 | STIGMASTEROL                                               | 0                   | C29H48O      | 412.71  |                                                                     | p1 4-6  | -17.97 | 27.51 | 4 | 0.96  | 0.10 | 4 | 48.6  |
| 632 | EMODIN                                                     | 518-82-1            | C15H10O5     | 270.24  | antibacterial, antineoplastic, cathartic, tyrosine kinase inhibitor | p3 6-3  | -17.99 | 7.24  | 4 | -0.04 | 0.07 | 4 | -3.0  |
| 633 | 1-HYDROXY-3,6,7-TRIMETHOXY-2,8-DIPRENYLXANTHONE            | 15404-76-9          | C26H30O6     | 438.53  |                                                                     | p3 4-6  | -18.05 | 4.77  | 4 | 0.12  | 0.15 | 4 | 7.7   |
| 634 | THEOBROMINE                                                | 83-67-0             | C7H8N4O2     | 180.17  | diuretic, bronchodilator, cardiotonic                               | P2 8-3  | -18.14 | 6.74  | 4 | 0.03  | 0.09 | 4 | 2.2   |
| 635 | GALANGIN TRIMETHYL ETHER                                   | 26964-29-4          | C18H16O5     | 312.33  |                                                                     | p3 9-2  | -18.22 | 2.52  | 4 | 0.13  | 0.11 | 4 | 8.8   |
| 636 | ISOTECTORIGENIN, 7-METHYL ETHER                            | 0                   | C18H16O6     | 328.32  |                                                                     | p4 10-5 | -18.66 | 5.87  | 4 | 0.04  | 0.05 | 4 | 3.0   |
| 637 | ASTRAGALOSIDE IV                                           | 84687-43-4          | C41H68O14    | 784.99  |                                                                     | p1 5-8  | -18.98 | 33.36 | 4 | -0.19 | 0.07 | 4 | -14.1 |
| 638 | 2',4'-DIHYDROXYCHALCONE 4'-GLUCOSIDE                       | 0                   | C21H22O8     | 402.40  | anthelmintic & antiulcerogenic                                      | p1 4-8  | -19.50 | 24.66 | 4 | 0.03  | 0.19 | 4 | 1.9   |
| 639 | AVOCADYNOFURAN                                             | 24708-33-6          | C17H26O      | 246.40  |                                                                     | p5 7-2  | -19.78 | 21.92 | 4 | 0.02  | 0.10 | 4 | 1.4   |
| 640 | PEONIFLORIN                                                | 23180-57-6          | C23H30O11    | 482.49  | antiinflammatory, antispasmodic, antihypertensive, antidiuretic     | p8 3-4  | -19.87 | 6.80  | 4 | -0.11 | 0.10 | 4 | -7.6  |
| 641 | KAINIC ACID                                                | 487-79-6            | C10H15NO4    | 213.24  | glutamate receptor agonist, anthelmintic                            | p7 7-2  | -19.89 | 9.21  | 4 | -0.04 | 0.08 | 4 | -2.6  |
| 642 | HELENINE                                                   | 546-43-0            | C15H20O2     | 232.33  | anthelmintic, antibacterial, antineoplastic                         | p7 5-5  | -19.97 | 8.59  | 4 | 0.10  | 0.10 | 4 | 6.4   |
| 643 | LECANORIC ACID                                             | 480-56-8            | C16H14O7     | 318.29  |                                                                     | p4 5-5  | -19.97 | 8.59  | 4 | -0.02 | 0.10 | 4 | -1.2  |
| 644 | 3beta-HYDROXY-23,24-BISNORCHOL-5-ENIC ACID                 | 0                   | C22H34O3     | 346.51  |                                                                     | p3 5-1  | -20.26 | 8.34  | 4 | -0.71 | 0.01 | 4 | -63.2 |
| 645 | MADECASSIC ACID                                            | 18449-41-7          | C30H48O6     | 504.71  | wound healing                                                       | p1 9-8  | -20.30 | 17.06 | 4 | -0.16 | 0.13 | 4 | -11.7 |
| 646 | THREONINE (L)                                              | 72-19-5             | C4H9NO3      | 119.12  | amino acid, nutrient                                                | p7 10-1 | -20.50 | 11.38 | 4 | -0.26 | 0.10 | 4 | -19.5 |
| 647 | HISTAMINE DIHYDROCHLORIDE                                  | 51-45-6 [histamine] | C5H11Cl2N3   | 184.07  | H1&2 agonist, edema induction, gastric secretion stimulant          | p10 3-2 | -20.59 | 14.84 | 4 | 0.02  | 0.08 | 4 | 1.3   |
| 648 | NEROL                                                      | 106-25-2            | C10H18O      | 154.25  | weak estrogen receptor blocker                                      | p5 9-6  | -20.59 | 7.59  | 4 | 0.43  | 0.09 | 4 | 25.8  |
| 649 | PROTOPORPHYRIN IX                                          | 553-12-8            | C34H34N4O4   | 562.67  | hepatoprotectant                                                    | p8 2-6  | -20.60 | 28.20 | 4 | 0.00  | 0.20 | 4 | -0.1  |
| 650 | PTAEROXYLIN                                                | 14729-11-4          | C15H14O4     | 258.28  |                                                                     | p4 7-3  | -20.69 | 5.56  | 4 | -0.13 | 0.08 | 4 | -9.7  |
| 651 | XANTHOXYLIN                                                | 90-24-4             | C10H12O4     | 196.20  |                                                                     | p3 4-5  | -20.73 | 2.33  | 4 | 0.08  | 0.04 | 4 | 5.4   |
| 652 | VINCAMINE                                                  | 1617-90-9           | C21H26N2O3   | 354.45  | vasodilator                                                         | p6 5-4  | -20.79 | 8.57  | 4 | 0.12  | 0.06 | 4 | 8.2   |
| 653 | NORSTICTIC ACID                                            | 571-67-5            | C18H12O9     | 372.29  | antibacterial                                                       | p6 2-1  | -20.79 | 12.81 | 4 | -0.18 | 0.09 | 4 | -13.4 |
| 654 | SINAPIC ACID METHYL ETHER                                  | 90-50-6             | C12H14O5     | 238.24  |                                                                     | p1 5-5  | -20.82 | 14.35 | 4 | 0.66  | 0.12 | 3 | 36.6  |
| 655 | PECTOLINARIN                                               | 28978-02-1          | C29H34O15    | 622.59  |                                                                     | p4 9-5  | -20.96 | 9.20  | 4 | 1.99  | 1.75 | 4 | 74.8  |

|     |                                              |                        |                |         |                                                        |          |        |       |   |       |      |   |       |
|-----|----------------------------------------------|------------------------|----------------|---------|--------------------------------------------------------|----------|--------|-------|---|-------|------|---|-------|
| 656 | YOHIMBIC ACID HYDRATE                        | 522-87-2               | C20H26N2O4     | 358.44  |                                                        | p6 2-5   | -21.23 | 3.47  | 4 | -0.27 | 0.06 | 4 | -20.7 |
| 657 | 2',4-DIHYDROXYCHALCONE                       | 13323-66-5             | C15H12O3       | 240.26  |                                                        | p5 10-3  | -21.40 | 13.06 | 4 | 0.13  | 0.13 | 4 | 8.3   |
| 658 | AVOCADENOFURAN                               | 25346-24-1             | C17H28O        | 248.41  |                                                        | p6 6-3   | -21.47 | 25.05 | 4 | -0.41 | 0.09 | 4 | -32.5 |
| 659 | GOSSYPOL-ACETIC ACID COMPLEX                 | 0                      | C32H34O10      | 578.62  | male contraceptive                                     | p6 10-1  | -21.55 | 10.62 | 4 | -0.10 | 0.06 | 4 | -7.1  |
| 660 | GANGALEOIDIN                                 | 55365-63-4             | C18H14Cl2O7    | 413.21  |                                                        | p8 4-5   | -21.59 | 19.44 | 4 | -0.05 | 0.18 | 4 | -3.3  |
| 661 | DEHYDRODIHYDROROTENONE                       | 6659-45-6              | C23H22O6       | 394.43  |                                                        | P2 8-7   | -21.64 | 13.80 | 4 | 0.06  | 0.12 | 4 | 4.4   |
| 662 | BACITRACIN                                   | 1405-87-4              | C66H103N17O16S | 1422.73 | antibacterial                                          | p7 8-2   | -21.81 | 8.19  | 4 | 0.02  | 0.06 | 4 | 1.4   |
| 663 | OSAJIN 4'-METHYL ETHER                       | 27762-88-5             | C26H26O5       | 418.49  |                                                        | p8 5-7   | -21.87 | 15.35 | 4 | -0.04 | 0.06 | 4 | -2.7  |
| 664 | MIMOSINE                                     | 0                      | C8H10N2O4      | 198.18  | depilatory agent                                       | p8 4-8   | -22.01 | 14.13 | 4 | -0.01 | 0.11 | 4 | -0.4  |
| 665 | GOSSYPIN                                     | 652-78-8               | C21H20O13      | 480.39  |                                                        | p5 5-5   | -22.05 | 9.68  | 4 | -0.07 | 0.08 | 4 | -4.8  |
| 666 | BERGAPTEN                                    | 484-20-8               | C12H8O4        | 216.20  | antipsoriatic, antiinflammatory                        | p6 3-5   | -22.30 | 11.50 | 4 | 0.06  | 0.05 | 4 | 4.3   |
| 667 | LANOSTEROL                                   | 79-63-0                | C30H50O        | 426.73  |                                                        | p9 6-4   | -22.47 | 9.27  | 4 | -0.24 | 0.23 | 4 | -18.1 |
| 668 | CEAROLIN                                     | 52811-37-7             | C14H12O4       | 244.25  |                                                        | p8 8-3   | -22.53 | 5.49  | 4 | -0.27 | 0.20 | 4 | -21.0 |
| 669 | LYSINE (L) HYDROCHLORIDE                     | 657-27-2               | C6H15ClN2O2    | 182.65  | amino acid, nutrient                                   | p9 5-4   | -22.55 | 8.13  | 4 | -0.15 | 0.04 | 4 | -11.0 |
| 670 | TANNIC ACID                                  | 1401-55-4              | C76H52O46      | 1701.23 | nonspecific enzyme/receptor blocker                    | p6 5-8   | -22.61 | 8.28  | 4 | 0.27  | 0.05 | 4 | 17.0  |
| 671 | GUAJOL(-)                                    | 489-86-1               | C15H26O        | 222.37  |                                                        | p6 8-2   | -22.71 | 13.37 | 4 | 0.20  | 0.09 | 4 | 12.7  |
| 672 | PROLINE (L)                                  | 147-85-3               | C5H9NO2        | 115.13  | amino acid, nutrient                                   | p9 9-2   | -22.72 | 4.93  | 4 | 0.03  | 0.06 | 4 | 1.9   |
| 673 | CHOLESTERYL ACETATE                          | 604-35-3               | C29H48O2       | 428.70  |                                                        | p8 2-3   | -22.86 | 10.92 | 4 | -0.08 | 0.09 | 4 | -5.8  |
| 674 | 3,4'-DIMETHOXYFLAVONE                        | 0                      | C17H14O4       | 282.30  |                                                        | p4 10-7  | -22.87 | 7.48  | 4 | 0.36  | 0.06 | 4 | 22.3  |
| 675 | PUERARIN                                     | 3681-99-0              | C21H20O9       | 416.39  | beta-adrenergic blocker                                | p2 2-6   | -22.97 | 9.51  | 4 | -0.46 | 0.56 | 4 | -37.4 |
| 676 | ISOPIMPINELLIN                               | 482-27-9               | C13H10O5       | 246.22  |                                                        | p3 2-2   | -23.17 | 11.47 | 4 | -0.24 | 0.01 | 4 | -18.1 |
| 677 | HARMANE                                      | 486-84-0               | C12H10N2       | 182.23  | intercalating agent, sedative                          | p6 9-3   | -23.18 | 8.01  | 4 | 0.07  | 0.03 | 4 | 4.5   |
| 678 | 5alpha-CHOLESTANOL                           | 80-97-7                | C27H48O        | 388.68  |                                                        | p3 5-4   | -23.23 | 4.52  | 4 | -0.03 | 0.05 | 4 | -2.4  |
| 679 | LINALOOL (+)                                 | 0                      | C10H18O        | 154.25  |                                                        | p6 10-4  | -23.26 | 4.26  | 4 | 0.09  | 0.10 | 4 | 6.1   |
| 680 | HYDRASTINE (1R, 9S)                          | 118-08-1               | C21H21NO6      | 383.40  | antihypertensive, sedative, antibacterial              | p10 10-4 | -23.62 | 10.12 | 4 | -0.18 | 0.04 | 4 | -13.2 |
| 681 | VIOLASTYRENE                                 | 19034-96-9             | C17H18O3       | 270.33  |                                                        | p5 3-3   | -23.64 | 6.82  | 4 | -0.30 | 0.14 | 4 | -23.3 |
| 682 | 4-METHYLDAPHNETIN                            | 2107-77-9              | C10H8O4        | 192.17  |                                                        | p8 1-7   | -23.67 | 8.52  | 4 | -0.22 | 0.03 | 4 | -16.6 |
| 683 | ESCULETIN                                    | 305-01-1               | C9H6O4         | 178.15  | antifungal                                             | p1 2-4   | -23.80 | 3.13  | 4 | 0.21  | 0.14 | 4 | 13.5  |
| 684 | 2',5'-DIHYDROXY-4-METHOXYCHALCONE            | 6342-92-3              | C16H14O4       | 270.29  |                                                        | p5 2-3   | -23.93 | 5.92  | 4 | -0.46 | 0.08 | 4 | -37.7 |
| 685 | METHYL TRIMETHOXYCINNAMATE                   | 7560-49-8, 20329-96-8  | C13H16O5       | 252.27  |                                                        | p6 5-1   | -24.35 | 9.66  | 4 | 0.04  | 0.03 | 4 | 2.8   |
| 686 | KOBUSONE                                     | 24173-71-5             | C14H22O2       | 222.33  |                                                        | p1 2-8   | -24.42 | 17.62 | 4 | 0.01  | 0.10 | 4 | 0.5   |
| 687 | DOBONEXENT                                   | 6217-54-5              | C22H32O2       | 328.50  | PAF inhibitor                                          | p6 7-5   | -24.46 | 18.07 | 4 | -0.06 | 0.05 | 4 | -4.0  |
| 688 | DEHYDROCHOLIC ACID                           | 81-23-2                | C24H34O5       | 402.54  | choloretic                                             | p10 9-5  | -24.47 | 17.89 | 4 | -0.06 | 0.03 | 4 | -4.2  |
| 689 | CHLOROGENIC ACID                             | 327-97-9               | C16H18O9       | 354.32  | antioxidant, free radical scavenger                    | p9 2-3   | -24.50 | 8.41  | 4 | -0.13 | 0.02 | 4 | -9.1  |
| 690 | TRIPTOPHENOLIDE                              | 74285-86-2             | C20H24O3       | 312.41  |                                                        | p9 6-5   | -24.54 | 10.22 | 4 | -0.29 | 0.16 | 4 | -22.1 |
| 691 | 2-METHOXY-5 (6)EPOXY-TETRAHYDROCARYOPHYLLENE | 0                      | C16H28O2       | 252.40  |                                                        | p3 9-1   | -24.74 | 6.54  | 4 | -0.15 | 0.05 | 4 | -11.1 |
| 692 | CARMINIC ACID                                | 1260-17-9              | C22H20O14      | 508.40  |                                                        | p5 8-2   | -24.88 | 10.47 | 4 | -0.10 | 0.11 | 4 | -7.5  |
| 693 | 7-OXOCHOLESTERYL ACETATE                     | 0                      | C29H46O3       | 442.69  |                                                        | p6 2-4   | -24.94 | 4.48  | 4 | -0.20 | 0.04 | 4 | -15.2 |
| 694 | PHLORACETOPHENONE                            | 480-66-0               | C8H8O4         | 168.15  |                                                        | P2 7-3   | -25.30 | 8.69  | 4 | 0.44  | 0.24 | 3 | 26.5  |
| 695 | ARTHONIOIC ACID                              | 25556-24-5             | C29H36O9       | 528.60  |                                                        | p3 4-2   | -25.37 | 14.37 | 4 | 0.02  | 0.09 | 4 | 1.1   |
| 696 | SOLANESOL                                    | 13190-97-1             | C45H74O        | 631.09  |                                                        | p5 10-4  | -25.87 | 1.79  | 4 | 0.16  | 0.12 | 4 | 10.5  |
| 697 | GENETICIN                                    | 49863-47-0, 108321-42- | C20H40N4O10    | 496.56  | antibacterial                                          | p5 9-4   | -26.05 | 16.30 | 4 | 0.07  | 0.07 | 4 | 4.9   |
| 698 | RIBOFLAVIN                                   | 83-88-5                | C17H20N4O6     | 376.37  | Vitamin B2; Vitamin cofactor; LD5(rat) 56 mg/kg ip     | p6 9-7   | -26.60 | 14.48 | 4 | 0.02  | 0.03 | 4 | 1.1   |
| 699 | HAEMATOXYLIN PENTAACETATE                    | 0                      | C26H24O12      | 528.47  |                                                        | p5 7-4   | -26.73 | 11.62 | 4 | 0.19  | 0.12 | 4 | 12.3  |
| 700 | CHOLESTEROL                                  | 57-88-5                | C27H46O        | 386.67  | emulsifying agent                                      | p7 4-2   | -26.79 | 5.06  | 4 | -0.05 | 0.03 | 4 | -3.8  |
| 701 | IRIGINOL HEXAACETATE                         | 0                      | C27H22O14      | 570.47  |                                                        | p4 4-2   | -26.79 | 5.06  | 4 | -0.17 | 0.03 | 4 | -12.3 |
| 702 | ACETOSYRINGONE                               | 2478-38-8              | C10H12O4       | 196.20  | insect attractant, plant hormone                       | p7 4-4   | -26.85 | 11.01 | 4 | -0.06 | 0.07 | 4 | -4.0  |
| 703 | ANGOLENSIN (R)                               | 4842-48-2              | C16H16O4       | 272.30  |                                                        | p4 4-4   | -26.85 | 11.01 | 4 | -0.17 | 0.07 | 4 | -12.5 |
| 704 | DUARTIN (-)                                  | 52305-04-1             | C18H20O6       | 332.36  |                                                        | p5 6-3   | -26.87 | 16.43 | 4 | -0.20 | 0.09 | 4 | -15.3 |
| 705 | DIMETHYLCAFFEIC ACID                         | 14737-89-4             | C11H12O4       | 208.22  |                                                        | p2 2-4   | -27.15 | 4.30  | 4 | -0.49 | 0.57 | 4 | -40.0 |
| 706 | EPINEPHRINE BITARTRATE                       | 51-42-3                | C13H19NO9      | 333.30  | adrenergic agonist, bronchodilator, antiglaucoma agent | p8 3-1   | -27.15 | 4.27  | 4 | 0.04  | 0.08 | 4 | 2.6   |
| 707 | HAEMATOXYLIN                                 | 517-28-2               | C16H14O6       | 302.29  |                                                        | p4 9-4   | -27.24 | 2.78  | 4 | 0.00  | 0.03 | 4 | 0.1   |

|     |                                                       |                      |              |        |                                                                                                                     |          |        |       |   |       |      |   |       |
|-----|-------------------------------------------------------|----------------------|--------------|--------|---------------------------------------------------------------------------------------------------------------------|----------|--------|-------|---|-------|------|---|-------|
| 708 | TYRAMINE                                              | 51-67-2              | C8H11NO      | 137.18 | adrenergic agonist                                                                                                  | p8 3-3   | -27.42 | 13.79 | 4 | -0.27 | 0.15 | 4 | -20.9 |
| 709 | 4-METHYLIMIDAZOLE                                     | 822-36-6             | C4H6N2       | 82.11  |                                                                                                                     | p6 3-2   | -27.80 | 13.76 | 4 | 0.18  | 0.07 | 4 | 11.5  |
| 710 | 5alpha-CHOLESTAN-3beta-OL-6-ONE                       | 0                    | C27H46O2     | 402.67 |                                                                                                                     | p2 1-6   | -27.83 | 14.93 | 4 | 0.53  | 0.04 | 4 | 30.6  |
| 711 | CADIN-4-EN-10-OL                                      | 0                    | C15H26O      | 222.37 |                                                                                                                     | p9 1-3   | -28.21 | 9.30  | 4 | -0.42 | 0.11 | 4 | -34.1 |
| 712 | SOLASODINE                                            | 126-17-0             | C27H43NO2    | 413.65 | antineoplastic, antiinflammatory                                                                                    | p3 10-4  | -28.34 | 3.86  | 4 | 0.07  | 0.08 | 4 | 4.6   |
| 713 | 4-METHOXYDALBERGIONE                                  | 4646-86-0            | C16H14O3     | 254.29 |                                                                                                                     | p1 10-8  | -28.49 | 14.51 | 4 | -0.03 | 0.11 | 4 | -2.3  |
| 714 | APHYLIC ACID                                          | 642-67-1             | C15H26N2O2   | 266.39 |                                                                                                                     | p1 10-7  | -28.53 | 19.92 | 4 | 0.25  | 0.03 | 4 | 16.1  |
| 715 | CARYOPHYLLENE OXIDE                                   | 1139-30-6            | C14H22O      | 206.33 |                                                                                                                     | p1 8-7   | -28.53 | 19.92 | 4 | -0.23 | 0.10 | 4 | -17.5 |
| 716 | BOLDINE                                               | 476-70-0             | C19H21NO4    | 327.38 |                                                                                                                     | p9 1-2   | -28.61 | 6.78  | 4 | -0.34 | 0.12 | 4 | -26.4 |
| 717 | ERGOSTEROL                                            | 57-87-4              | C28H44O      | 396.66 |                                                                                                                     | p4 10-2  | -29.64 | 1.95  | 4 | -0.03 | 0.07 | 4 | -1.9  |
| 718 | TRIGONELLINE                                          | 535-83-1             | C7H7NO2      | 137.14 | antihyperglycemic                                                                                                   | P2 8-2   | -29.89 | 12.83 | 4 | 0.03  | 0.06 | 4 | 2.2   |
| 719 | PILOCARPINE NITRATE                                   | 148-72-1, 92-13-7    | C11H17N3O5   | 271.28 | antiglaucoma agent, miotic                                                                                          | p10 10-2 | -30.24 | 2.97  | 4 | -0.10 | 0.03 | 4 | -7.3  |
| 720 | HUMULENE (alpha)                                      | 6753-98-6            | C15H24       | 204.36 |                                                                                                                     | p6 10-2  | -30.91 | 4.06  | 4 | 0.00  | 0.03 | 4 | 0.1   |
| 721 | GENTAMICIN SULFATE                                    | 1405-41-0, 1403-66-3 | C21H45N5O11S | 575.68 | antibacterial                                                                                                       | p10 2-2  | -30.99 | 4.60  | 4 | -0.07 | 0.07 | 4 | -4.7  |
| 722 | RHETSININE                                            | 526-43-2             | C19H17N3O2   | 319.37 |                                                                                                                     | p2 6-1   | -31.21 | 10.59 | 4 | 0.51  | 0.23 | 4 | 29.6  |
| 723 | 13-METHYL-4,4-BISNOR-8,11,13-<br>PODOCARPATRIEN-3-ONE | 0                    | C16H20O      | 228.34 |                                                                                                                     | p8 1-6   | -31.37 | 15.11 | 4 | -0.03 | 0.10 | 4 | -2.0  |
| 724 | HARMALINE                                             | 304-21-2             | C13H14N2O    | 214.27 | CNS stimulant, antiparkinsonian agent                                                                               | p6 5-2   | -31.87 | 10.11 | 4 | 0.01  | 0.03 | 4 | 0.9   |
| 725 | DIHYDROXY (3alpha,12alpha)PREGNAN-<br>20-ONE          | 0                    | C21H34O3     | 334.50 |                                                                                                                     | p8 9-5   | -32.59 | 19.91 | 4 | -0.37 | 0.05 | 4 | -29.0 |
| 726 | GUAIACOL                                              | 90-05-1              | C7H8O2       | 124.14 | expectorant                                                                                                         | p6 10-3  | -32.94 | 10.42 | 4 | 0.02  | 0.04 | 4 | 1.6   |
| 727 | ISOKOBUSONE                                           | 24173-72-6           | C14H22O2     | 222.33 |                                                                                                                     | p3 10-2  | -33.53 | 3.68  | 4 | -0.25 | 0.04 | 4 | -18.7 |
| 728 | SORBITOL                                              | 50-70-4              | C6H14O6      | 182.17 | sweetening agent and humectant                                                                                      | p6 3-4   | -33.80 | 11.82 | 4 | -0.18 | 0.06 | 4 | -13.2 |
| 729 | 4,4'-DIMETHOXYDALBERGIONE                             | 0                    | C17H16O4     | 284.31 |                                                                                                                     | p5 6-4   | -34.16 | 35.02 | 4 | -0.01 | 0.08 | 4 | -0.7  |
| 730 | POMIFERIN TRIMETHYL ETHER                             | 0                    | C28H30O6     | 462.55 | derivative                                                                                                          | p9 9-3   | -34.33 | 10.46 | 4 | 0.17  | 0.06 | 4 | 11.4  |
| 731 | METHYL ORSELLINATE                                    | 3187-58-4            | C9H10O4      | 182.18 |                                                                                                                     | p2 3-4   | -34.82 | 13.79 | 4 | 0.31  | 0.07 | 4 | 19.6  |
| 732 | beta-CAROTENE                                         | 7235-40-7            | C40H56       | 536.89 | antioxidant; provitamin A                                                                                           | p7 10-2  | -34.82 | 5.87  | 4 | 0.04  | 0.07 | 4 | 2.8   |
| 733 | BISPHENOL A                                           | 80-05-7              | C15H16O2     | 228.29 | endocrine disruptor, plastic monomer                                                                                | p7 3-2   | -35.16 | 16.89 | 4 | -0.20 | 0.03 | 4 | -15.0 |
| 734 | DEACETOXY(7)-7-OXOKHIVORINIC ACID                     | 0                    | C27H36O10    | 520.58 |                                                                                                                     | p4 3-2   | -35.16 | 16.89 | 4 | -0.32 | 0.03 | 4 | -24.4 |
| 735 | NEROLIDOL                                             | 7212-44-4            | C15H26O      | 222.37 |                                                                                                                     | p5 3-7   | -35.53 | 12.65 | 4 | -0.17 | 0.16 | 4 | -12.9 |
| 736 | ACETYL HYMETOCHROME                                   | 2747-05-9            | C12H10O4     | 218.21 |                                                                                                                     | p6 2-2   | -35.81 | 14.76 | 4 | -0.06 | 0.10 | 4 | -4.5  |
| 737 | RIBOSTAMYCIN SULFATE                                  | 25546-65-0           | C17H36N4O14S | 552.56 | antibacterial                                                                                                       | p9 5-2   | -35.94 | 13.39 | 4 | -0.03 | 0.23 | 4 | -2.0  |
| 738 | EPIANDROSTERONE                                       | 0                    | C19H30O2     | 290.45 |                                                                                                                     | p3 4-1   | -36.02 | 4.97  | 4 | -0.05 | 0.02 | 4 | -3.8  |
| 739 | CHOLESTAN-3-ONE                                       | 566-88-1             | C27H46O      | 386.67 |                                                                                                                     | p5 2-6   | -36.69 | 3.48  | 4 | -0.48 | 0.06 | 4 | -39.9 |
| 740 | PURPURIN                                              | 81-54-9              | C14H8O5      | 256.22 | xanthin oxidase inhibitor, irritant                                                                                 | p3 7-3   | -37.23 | 5.62  | 4 | -0.19 | 0.02 | 4 | -14.3 |
| 741 | 3,4-DIDESMETHYL-5-DESHYDROXY-3'-<br>ETHOXYSCLEROIN    | 0                    | C15H14O5     | 274.28 |                                                                                                                     | p9 5-1   | -37.23 | 10.14 | 4 | -0.39 | 0.13 | 4 | -31.4 |
| 742 | RESVERATROL 4'-METHYL ETHER                           | 33626-08-3           | C15H14O3     | 242.28 |                                                                                                                     | p7 2-2   | -37.33 | 11.06 | 4 | -0.37 | 0.07 | 4 | -29.0 |
| 743 | FRAXIDIN METHYL ETHER                                 | 0                    | C12H12O5     | 236.23 |                                                                                                                     | p4 2-2   | -37.33 | 11.06 | 4 | -0.48 | 0.07 | 4 | -39.5 |
| 744 | CHOLEST-5-EN-3-ONE                                    | 601-54-7             | C27H44O      | 384.65 |                                                                                                                     | p9 4-2   | -37.48 | 6.58  | 4 | 0.04  | 0.04 | 4 | 2.7   |
| 745 | APIGENIN DIMETHYL ETHER                               | 5728-44-9            | C17H14O5     | 298.30 |                                                                                                                     | p1 2-3   | -37.84 | 16.95 | 4 | 0.17  | 0.16 | 4 | 11.3  |
| 746 | beta-AMYRIN                                           | 559-70-6             | C30H50O      | 426.73 |                                                                                                                     | p9 10-2  | -38.19 | 9.19  | 4 | -0.12 | 0.12 | 4 | -8.3  |
| 747 | GUAIAZULENE                                           | 489-84-9             | C15H18       | 198.31 | antioxidant, inhibits lipid peroxidation inhibitor,<br>antiinflammatory, hepatoprotectant; LD5(rat)<br>155 mg/kg po | p8 6-3   | -38.21 | 55.45 | 4 | -0.34 | 0.16 | 4 | -27.0 |
| 748 | DEHYDROROTENONE                                       | 30990-44-4           | C23H20O6     | 392.41 |                                                                                                                     | p5 5-3   | -38.48 | 8.13  | 4 | -0.07 | 0.08 | 4 | -4.9  |
| 749 | QUEBRACHITOL                                          | 642-38-6             | C7H14O6      | 194.19 |                                                                                                                     | p9 3-2   | -39.02 | 2.63  | 4 | -0.16 | 0.06 | 4 | -11.4 |
| 750 | 3-HYDROXYCOUMARIN                                     | 939-19-5             | C9H6O3       | 162.15 |                                                                                                                     | p3 10-3  | -39.59 | 7.07  | 4 | -0.21 | 0.03 | 4 | -15.7 |
| 751 | DEOXYCHOLIC ACID                                      | 88-44-3              | C24H40O4     | 392.58 |                                                                                                                     | p1 9-7   | -39.82 | 12.56 | 4 | 0.55  | 0.28 | 4 | 31.7  |
| 752 | FISSINOLIDE                                           | 1915-69-1            | C29H36O8     | 512.61 |                                                                                                                     | p1 7-7   | -39.82 | 12.56 | 4 | -0.81 | 0.06 | 4 | -75.3 |
| 753 | 3-ACETYLGEDUNOL                                       | 0                    | C30H40O8     | 528.65 |                                                                                                                     | p1 5-7   | -40.49 | 7.59  | 4 | 1.19  | 0.12 | 3 | 56.3  |
| 754 | 21-ACETOXPREGNENOLONE                                 | 566-78-9             | C23H34O4     | 374.53 | precursor in corticoid biosynthesis, derivative                                                                     | p5 8-5   | -41.17 | 5.68  | 4 | 0.10  | 0.10 | 4 | 6.5   |
| 755 | URSODIOL                                              | 128-13-2             | C24H40O4     | 392.58 | anticholelithogenic; LD5(rat) 89 mg/kg ip                                                                           | p10 10-3 | -41.66 | 8.38  | 4 | -0.15 | 0.05 | 4 | -10.9 |
| 756 | HARPAGOSIDE                                           | 19210-12-9           | C23H28O11    | 480.47 |                                                                                                                     | p5 9-5   | -42.12 | 2.29  | 4 | 0.36  | 0.09 | 4 | 21.8  |
| 757 | ORNITHINE HYDROCHLORIDE                               | 70-26-8              | C5H13CIN2O2  | 168.62 | hepatoprotectant, anticholesteremic                                                                                 | p6 10-5  | -42.36 | 8.44  | 4 | -0.07 | 0.12 | 4 | -5.2  |
| 758 | ALIZARIN                                              | 72-48-0              | C14H8O4      | 240.22 | antimutagen                                                                                                         | p9 5-3   | -42.36 | 4.93  | 4 | -0.13 | 0.07 | 4 | -9.1  |



|     |                                                        |                    |              |        |                                                                                                              |         |        |       |   |       |      |   |        |
|-----|--------------------------------------------------------|--------------------|--------------|--------|--------------------------------------------------------------------------------------------------------------|---------|--------|-------|---|-------|------|---|--------|
| 759 | KINETIN                                                | 525-79-1           | C10H9N5O     | 215.22 | auxin, plant growth regulator, plant cell division promotor                                                  | p1 6-4  | -42.74 | 18.96 | 4 | 0.54  | 0.02 | 4 | 31.0   |
| 760 | CITROPTEN                                              | 487-06-9           | C11H10O4     | 206.20 | photosensitizing agent                                                                                       | p2 6-2  | -43.58 | 6.75  | 4 | 0.38  | 0.07 | 4 | 23.1   |
| 761 | 2,3,4-TRIHYDROXY-4'-ETHOXYBENZOPHENONE                 | 0                  | C15H14O5     | 274.28 |                                                                                                              | p9 10-8 | -43.73 | 7.79  | 4 | 0.22  | 0.05 | 4 | 14.4   |
| 762 | GRAMINE                                                | 87-52-5            | C11H14N2     | 174.25 |                                                                                                              | p8 7-4  | -43.87 | 19.34 | 4 | -0.42 | 0.13 | 4 | -33.5  |
| 763 | APIGENIN                                               | 520-36-5           | C15H10O5     | 270.24 | antispasmodic, antineoplastic, topoisomerase I inhibitor                                                     | p9 10-3 | -44.57 | 6.62  | 4 | 0.06  | 0.05 | 4 | 3.9    |
| 764 | METHYL ROBUSTONE                                       | 0                  | C22H18O6     | 378.39 |                                                                                                              | P2 9-5  | -44.64 | 13.43 | 4 | -0.08 | 0.15 | 4 | -5.4   |
| 765 | CITRULLINE                                             | 627-77-0           | C6H13N3O3    | 175.19 |                                                                                                              | p1 5-4  | -44.68 | 15.25 | 4 | 0.62  | 0.10 | 2 | 34.9   |
| 766 | ATRANORIN                                              | 479-20-9           | C19H18O8     | 374.35 |                                                                                                              | p1 4-7  | -45.91 | 11.98 | 4 | 1.02  | 0.16 | 4 | 50.7   |
| 767 | LAWSONE                                                | 83-72-7            | C10H6O3      | 174.16 |                                                                                                              | p6 1-5  | -46.08 | 13.52 | 4 | -0.16 | 0.11 | 4 | -12.0  |
| 768 | PYRRROMYCIN                                            | 668-17-7           | C30H35NO11   | 585.61 | antibacterial                                                                                                | p8 3-5  | -46.08 | 5.01  | 4 | 0.35  | 0.15 | 4 | 21.5   |
| 769 | DEFEROXAMINE MESYLATE                                  | 138-14-7, 70-51-9  | C26H52N6O11S | 656.80 | chelating agent (Fe & Al)                                                                                    | p10 3-1 | -48.55 | 15.61 | 4 | 0.31  | 0.07 | 4 | 19.6   |
| 770 | LATHOSTEROL                                            | 0                  | C27H46O      | 386.67 |                                                                                                              | p2 3-8  | -50.10 | 20.42 | 4 | 0.35  | 0.08 | 4 | 21.4   |
| 771 | HYDROXYPROGESTERONE                                    | 3168-01-2          | C21H30O3     | 330.47 | progesterin                                                                                                  | p6 9-4  | -50.17 | 0.99  | 4 | 0.37  | 0.06 | 4 | 22.7   |
| 772 | APIOLE                                                 | 523-80-8           | C12H14O4     | 222.24 | antipyretic, diuretic, insecticide                                                                           | p7 5-4  | -50.23 | 2.73  | 4 | 0.06  | 0.04 | 4 | 3.8    |
| 773 | 3 $\alpha$ -HYDROXY-4,4-BISNOR-8,11,13-PODOCARPATRIENE | 0                  | C15H20O      | 216.33 |                                                                                                              | p4 5-4  | -50.23 | 2.73  | 4 | -0.06 | 0.04 | 4 | -4.1   |
| 774 | GARCINOLIC ACID                                        | 0                  | C38H46O9     | 646.78 |                                                                                                              | p2 3-2  | -51.29 | 18.22 | 4 | 0.36  | 0.16 | 4 | 22.0   |
| 775 | NOSCAPINE HYDROCHLORIDE                                | 912-60-7, 128-62-1 | C22H24ClNO7  | 449.89 | antitussive                                                                                                  | p10 2-4 | -51.62 | 13.18 | 4 | 0.30  | 0.05 | 4 | 18.9   |
| 776 | EPICATECHIN PENTAACETATE                               | 0                  | C25H24O11    | 500.46 |                                                                                                              | p6 3-1  | -52.46 | 17.01 | 4 | -0.02 | 0.01 | 4 | -1.3   |
| 777 | ALLOPREGNANOLONE                                       | 0                  | C21H34O2     | 318.50 |                                                                                                              | p4 9-1  | -52.47 | 4.62  | 4 | 0.02  | 0.08 | 4 | 1.3    |
| 778 | EQUILIN                                                | 474-86-2           | C18H20O2     | 268.36 | estrogen                                                                                                     | p10 6-1 | -53.61 | 45.92 | 4 | -0.60 | 0.10 | 4 | -51.5  |
| 779 | CAPSAICIN                                              | 404-86-4           | C18H27NO3    | 305.42 | analgesic (topical), depletes Substance P, neurotoxic                                                        | p10 1-4 | -54.23 | 9.61  | 4 | 0.00  | 0.17 | 4 | 0.1    |
| 780 | THEANINE POTASSIUM                                     | 3081-61-6          | C7H13KN2O3   | 212.30 |                                                                                                              | p3 5-3  | -54.47 | 14.26 | 4 | -0.45 | 0.07 | 4 | -36.3  |
| 781 | HARMOL HYDROCHLORIDE                                   | 40580-83-4         | C12H11ClN2O  | 234.69 | MAO inhibitor                                                                                                | p1 2-2  | -55.14 | 10.17 | 4 | -0.14 | 0.05 | 4 | -10.1  |
| 782 | LITHOCHOLIC ACID                                       | 434-13-9           | C24H40O3     | 376.58 | LD5(mouse) 39 mg/kg po                                                                                       | p1 2-5  | -55.75 | 9.37  | 4 | 0.65  | 0.06 | 4 | 36.1   |
| 783 | JUAREZIC ACID                                          | 1552-94-9          | C11H10O2     | 174.20 |                                                                                                              | p3 5-2  | -55.89 | 17.98 | 4 | -0.57 | 0.05 | 4 | -48.4  |
| 784 | PHYSCION                                               | 521-61-9           | C16H12O5     | 284.27 | antibacterial, cathartic                                                                                     | p9 9-5  | -57.45 | 5.78  | 4 | 0.20  | 0.03 | 4 | 12.9   |
| 785 | ABIETIC ACID                                           | 514-10-3           | C20H30O2     | 302.46 |                                                                                                              | p9 2-2  | -58.27 | 13.29 | 4 | -0.39 | 0.11 | 4 | -30.7  |
| 786 | GLYCOCHOLIC ACID                                       | 475-31-0           | C26H43NO6    | 465.64 |                                                                                                              | p8 6-4  | -58.36 | 28.23 | 4 | -0.31 | 0.30 | 4 | -23.7  |
| 787 | POMIFERIN DIMETHYL ETHER                               | 0                  | C27H28O6     | 448.52 |                                                                                                              | p9 4-3  | -58.61 | 11.00 | 4 | 0.09  | 0.06 | 4 | 6.1    |
| 788 | CORYNANTHINE                                           | 123333-62-0        | C21H26N2O3   | 354.45 |                                                                                                              | p8 7-7  | -58.95 | 29.94 | 4 | -0.61 | 0.06 | 4 | -53.1  |
| 789 | MELATONIN                                              | 73-31-4            | C13H16N2O2   | 232.28 | sleep induction, modifies circadian rhythm                                                                   | p2 2-7  | -62.19 | 3.45  | 4 | -1.56 | 0.66 | 4 | -195.5 |
| 790 | TRIACETYLRÉSVERATROL                                   | 42206-94-0         | C20H18O6     | 354.36 |                                                                                                              | p3 4-3  | -64.78 | 13.82 | 4 | 0.19  | 0.12 | 4 | 12.4   |
| 791 | 3-METHOXYCATECHOL                                      | 934-00-9           | C7H8O3       | 140.14 |                                                                                                              | p3 8-2  | -66.69 | 9.30  | 4 | 0.05  | 0.04 | 4 | 3.2    |
| 792 | CHRYSOPHANOL                                           | 481-74-3           | C15H10O4     | 254.24 |                                                                                                              | P2 9-4  | -71.62 | 13.37 | 4 | 0.17  | 0.16 | 4 | 11.4   |
| 793 | UBIDECARENEONE                                         | 303-98-0           | C59H90O4     | 863.37 | cardiovascular agent                                                                                         | p1 10-5 | -74.78 | 16.33 | 4 | 0.35  | 0.15 | 4 | 21.3   |
| 794 | 7-DEACETYLKHIVORIN                                     | 0                  | C30H40O9     | 544.65 |                                                                                                              | p1 8-5  | -74.78 | 16.33 | 4 | -0.55 | 0.06 | 4 | -46.2  |
| 795 | VULPINIC ACID                                          | 521-52-8           | C19H14O5     | 322.32 | antiinflammatory, antibacterial, plant growth inhibitor                                                      | p7 10-4 | -77.92 | 7.79  | 4 | 0.64  | 0.09 | 4 | 36.0   |
| 796 | FUSIDIC ACID                                           | 6990-06-3          | C31H48O6     | 516.72 | antibacterial                                                                                                | p10 1-2 | -82.83 | 11.31 | 4 | -0.30 | 0.14 | 4 | -23.2  |
| 797 | SINOMENINE                                             | 115-53-7           | C19H23NO4    | 329.40 | weak abortifacient, immunosuppressant, analgesic, antiinflammatory; LD5 (po) 58 mg/kg; (ip) 285 mg/kg(mouse) | p2 2-8  | -83.45 | 48.85 | 4 | -0.78 | 0.59 | 4 | -71.8  |
| 798 | QUERCETIN 5,7,3',4'-TETRAMETHYL ETHER                  | 1244-78-6          | C19H18O7     | 358.35 |                                                                                                              | p8 7-3  | -84.09 | 21.55 | 4 | -0.81 | 0.33 | 4 | -75.6  |
| 799 | TANSHINONE IIA SULFONATE SODIUM                        | 0                  | C19H17NaO6S  | 396.40 | free radical scavenger                                                                                       | p7 3-3  | -96.29 | 8.40  | 4 | 0.01  | 0.04 | 4 | 0.9    |
| 800 | HETEROPEUCENIN, METHYL ETHER                           | 26213-95-6         | C16H18O4     | 274.32 |                                                                                                              | p4 3-3  | -96.29 | 8.40  | 4 | -0.10 | 0.04 | 4 | -7.2   |
