# Supplementary material for: Discovery of Novel Anti-cryptosporidial Activities From Natural Products by in vitro High-Throughput Phenotypic Screening
Source: PubMed Central journal article supplement (PMC6736568; doi:10.3389/fmicb.2019.01999), 2019-08-29
Supplement: Table_2.pdf [file Table_2.pdf]

**Table S2.** Secondary screening: Anti-cryptosporidial activity of 88 compounds at 3.3  $\mu$ M.

| #  | Compound name                                           | CAS #                                | Formula       | Mol Wt     | Bioactivity and note                                                            | Plate # | % Inhibition (3.3 $\mu$ M) | SEM   | N |
|----|---------------------------------------------------------|--------------------------------------|---------------|------------|---------------------------------------------------------------------------------|---------|----------------------------|-------|---|
| 1  | MONENSIN SODIUM<br>(monensin A is shown)                | 22373-78-0, 17090-79-8<br>(monensin) | C37H63NaO10   | 690.89846  | antibacterial                                                                   | P10 6-6 | 99                         | 0.22  | 4 |
| 2  | DACTINOMYCIN                                            | 50-76-0                              | C62H86N12O16  | 1255.44752 | antineoplastic, intercalating agent                                             | P6 10-6 | 97                         | 0.59  | 4 |
| 3  | EMETINE DIHYDROCHLORIDE                                 | 316-42-7, 483-18-1<br>[emetine]      | C29H42Cl2N2O4 | 553.57509  | inhibits RNA, DNA and protein synthesis                                         | P2 1-4  | 95                         | 0.75  | 4 |
| 4  | PACLITAXEL                                              | 33069-62-4                           | C47H51NO14    | 853.92882  | antineoplastic                                                                  | P10 2-7 | 93                         | 0.56  | 4 |
| 5  | CHRYSANTHEMIC ACID, ETHYL<br>ESTER                      |                                      | C12H20O2      | 196.292    | insecticide                                                                     | P1 6-1  | 91                         | 1.72  | 4 |
| 6  | VALINOMYCIN                                             | 2001-95-8                            | C54H90N6O18   | 1111.3488  | antibiotic; LD50 (rat, po) 4 mg/kg                                              | P7 4-1  | 87                         | 2.06  | 4 |
| 7  | MITOMYCIN                                               | 50-07-7                              | C15H18N4O5    | 334.33451  | antineoplastic                                                                  | P7 9-2  | 78                         | 2.14  | 4 |
| 8  | CYCLOSPORINE                                            | 59865-13-3                           | C62H111N11O12 | 1202.64247 | immunosuppressant                                                               | p10 2-6 | 77                         | 0.95  | 4 |
| 9  | DEACETOXY-7-OXOGEDUNIN                                  |                                      | C26H30O6      | 438.5254   |                                                                                 | p3 8-8  | 77                         | 3.50  | 4 |
| 10 | ROTENONE                                                | 83-79-4                              | C23H22O6      | 394.42819  | acaricide, ectoparasiticide, antineoplastic, mitochondrial poison               | P8 5-5  | 76                         | 3.38  | 4 |
| 11 | DIHYDROTANSHINONE I                                     |                                      | C18H14O3      | 278.31048  |                                                                                 | p5 7-6  | 75                         | 8.45  | 4 |
| 12 | 3-DEOXO-3beta-<br>HYDROXYMEXICANOLIDE 16-<br>ENOL ETHER |                                      | C28H36O7      | 484.59492  |                                                                                 | P4 6-1  | 71                         | 3.02  | 4 |
| 13 | DEOXSAPPANONE B 7,3'-<br>DIMETHYL ETHER ACETATE         |                                      | C20H20O6      | 356.3788   |                                                                                 | p5 4-4  | 71                         | 3.56  | 4 |
| 14 | DAUNORUBICIN                                            | 20830-81-3                           | C27H29NO10    | 527.53288  | antineoplastic                                                                  | p10 2-1 | 71                         | 4.88  | 4 |
| 15 | DIGOXIGENIN                                             | 1672-46-4                            | C23H34O5      | 390.52443  |                                                                                 | P3 6-5  | 69                         | 1.40  | 4 |
| 16 | VINBLASTINE SULFATE                                     | 143-67-9, 865-21-4<br>[vinblastine]  | C46H60N4O13S  | 909.0741   | antineoplastic, spindle poison                                                  | p6 2-7  | 67                         | 6.71  | 4 |
| 17 | BAICALEIN                                               | 491-67-8                             | C15H10O5      | 270.24395  | antiviral (HIV)                                                                 | p3 3-3  | 66                         | 2.22  | 4 |
| 18 | PODOPHYLLIN ACETATE                                     | 1180-34-3                            | C24H24O9      | 456.45348  |                                                                                 | p5 3-6  | 64                         | 5.29  | 4 |
| 19 | 8beta-HYDROXYCARAPIN, 3,8-<br>HEMIACETAL                |                                      | C27H32O8      | 484.55129  |                                                                                 | P3 5-7  | 64                         | 3.16  | 4 |
| 20 | TANSHINONE IIA                                          | 568-72-9                             | C19H18O3      | 294.35351  | antineoplastic, bone resorption inhibitor, antiproliferative, apoptosis inducer | P8 4-4  | 63                         | 2.87  | 4 |
| 21 | DIMETHYLSULFONE                                         | 67-71-0                              | C2H6O2S       | 94.13292   | antiinflammatory, antiproliferative, antiparasitic                              | p7 8-3  | 61                         | 8.34  | 4 |
| 22 | CAMPTOTHECIN                                            | 7689-03-4                            | C20H16N2O4    | 348.36152  | antineoplastic                                                                  | p5 5-7  | 59                         | 3.04  | 4 |
| 23 | 2,3,4'-TRIHYDROXY-4-<br>METHOXYBENZOPHENONE             |                                      | C14H12O5      | 260.24874  |                                                                                 | p5 10-2 | 59                         | 7.86  | 4 |
| 24 | LOVASTATIN                                              | 75330-75-5                           | C24H36O5      | 404.55152  | antihyperlipidemic, HMGCoA reductase inhibitor                                  | p2 1-3  | 58                         | 3.06  | 4 |
| 25 | DIHYDROGAMBOGIC ACID                                    |                                      | C38H46O8      | 630.78552  |                                                                                 | P1 4-3  | 57                         | 5.70  | 4 |
| 26 | PICROPODOPHYLLIN                                        | 477-47-4                             | C22H22O8      | 414.41584  | Insulin growth factor 1 receptor inhibitor, antineoplastic                      | p9 7-4  | 56                         | 3.66  | 4 |
| 27 | DEACETYLGEDUNIN                                         |                                      | C26H32O6      | 440.54134  |                                                                                 | P4 10-6 | 56                         | 6.00  | 4 |
| 28 | DEOXSAPPANONE B 7,4'-<br>DIMETHYL ETHER                 |                                      | C18H18O5      | 314.34116  |                                                                                 | P4 8-6  | 52                         | 5.61  | 4 |
| 29 | 3,16-DIDEOXYMEXICANOLIDE-<br>3beta-DIOL                 |                                      | C27H36O7      | 472.58377  |                                                                                 | p6 9-1  | 52                         | 11.09 | 4 |
| 30 | DIMETHYL GAMBOGINATE                                    |                                      | C40H49ClO8    | 693.28473  |                                                                                 | P6 7-1  | 47                         | 6.66  | 4 |
| 31 | ISOOSAJIN                                               | 5745-54-0                            | C25H24O5      | 404.46703  |                                                                                 | P5 1-4  | 39                         | 10.37 | 4 |
| 32 | HESPERIDIN                                              | 520-26-3                             | C28H34O15     | 610.57418  | capillary protectant                                                            | p7 7-8  | 36                         | 11.29 | 4 |
| 33 | SIROLIMUS                                               | 53123-88-9                           | C51H79NO13    | 914.19718  | immunosuppressant, antineoplastic; rapamycin                                    | p10 4-7 | 35                         | 5.34  | 4 |
| 34 | BUSSEIN                                                 | 41060-14-4                           | C43H54O18     | 858.89903  |                                                                                 | P4 5-2  | 34                         | 6.63  | 4 |
| 35 | HAEMATOPORPHYRIN                                        | 14459-29-1                           | C34H38N4O6    | 598.70516  | antidepressant, antineoplastic                                                  | P8 9-4  | 33                         | 9.67  | 4 |

|    |                                          |                                      |                 |           |                                                                |         |     |       |   |
|----|------------------------------------------|--------------------------------------|-----------------|-----------|----------------------------------------------------------------|---------|-----|-------|---|
| 36 | PRISTIMERIN                              | 1258-84-0                            | C30H40O4        | 464.6509  | antineoplastic, antiinflammatory                               | P3 8-5  | 30  | 8.13  | 4 |
| 37 | DEMETHYLNBOILETIN                        | 2174-59-6                            | C20H20O8        | 388.3776  |                                                                | P1 6-8  | 29  | 4.47  | 4 |
| 38 | ACETYL ISOGAMBOGIC ACID                  |                                      | C40H46O9        | 670.80722 |                                                                | P3 7-5  | 27  | 6.35  | 4 |
| 39 | PHENYLALANINE (L) HYDROCHLORIDE          | 63-91-2(base)                        | C9H12ClNO2      | 201.65449 | amino acid                                                     | p10 5-5 | 26  | 7.80  | 4 |
| 40 | 3alpha-ACETOXYDIHYDRODEOXYGEDUNIN        |                                      | C30H40O7        | 512.6491  |                                                                | P4 4-1  | 25  | 6.41  | 4 |
| 41 | TOMATINE                                 | 86273-92-9                           | C47H79NO21      | 994.14778 | antifungal, antibacterial, antiinflammatory agent              | P9 3-6  | 25  | 9.90  | 4 |
| 42 | RESERPINE                                | 50-55-5                              | C33H40N2O9      | 608.69475 | antihypertensive                                               | P10 4-3 | 24  | 2.75  | 4 |
| 43 | beta-SITOSTEROL                          | 83-46-5                              | C29H50O         | 414.72125 |                                                                | P8 8-5  | 20  | 8.93  | 4 |
| 44 | STROPHANTHIDINIC ACID LACTONE ACETATE    |                                      | C25H32O7        | 444.52959 |                                                                | P3 4-4  | 19  | 7.91  | 4 |
| 45 | URIDINE TRIPHOSPHATE TRISODIUM           | 19817-92-6                           | C9H12N2Na3O15P3 | 550.09119 | psychostimulant                                                | P8 2-1  | 17  | 12.69 | 4 |
| 46 | TRYPTOPHAN                               | 73-22-3 ['L']                        | C11H12N2O2      | 204.23049 | antidepressant, nutrient; LD50(rat) 1634 mg/kg ip              | p1 7-6  | 17  | 2.94  | 4 |
| 47 | ESTRAGOLE                                | 140-67-0                             | C10H12O         | 148.20654 | insect attractant, skin irritant, carcinogen                   | P8 2-4  | 15  | 6.83  | 4 |
| 48 | BENZYL ISOTHIOCYANATE                    | 622-78-6                             | C8H7NS          | 149.21569 | antineoplastic, antibacterial, antifungal                      | P9 1-8  | 14  | 9.03  | 4 |
| 49 | PLUMBAGIN                                | 481-42-5                             | C11H8O3         | 188.18461 | antibacterial, antifungal, tuberculostatic; antifeedant (worm) | P5 10-5 | 13  | 4.05  | 4 |
| 50 | TRYPTAMINE                               | 61-54-1                              | C10H12N2        | 160.22054 | psychotropic                                                   | P8 7-2  | 12  | 4.44  | 4 |
| 51 | PIPLARTINE                               | 20069-09-4                           | C17H19NO5       | 317.34468 | anti-asthma, antibronchitis                                    | p5 5-1  | 10  | 20.67 | 4 |
| 52 | PATULIN                                  | 149-29-1                             | C7H6O4          | 154.12347 | antibacterial                                                  | P9 10-4 | 10  | 8.80  | 4 |
| 53 | GRISEOFULVIN                             | 126-07-8                             | C17H17ClO6      | 352.77444 | antifungal, inhibits mitosis in metaphase                      | p10 6-8 | 9   | 8.34  | 4 |
| 54 | SAFROLE                                  | 94-59-7                              | C10H10O2        | 162.19    | anesthetic (topical) and antiseptic, pediculicide              | P9 3-8  | 8   | 16.16 | 4 |
| 55 | 3-HYDROXYTYRAMINE                        | 62-31-7                              | C8H11NO2        | 153.18237 | dopaminergic                                                   | P1 9-6  | 6   | 7.11  | 4 |
| 56 | IVERMECTIN                               | 70288-86-7                           | C48H74O14       | 875.11658 | antiparasitic                                                  | p10 1-8 | 6   | 9.34  | 4 |
| 57 | 1,3-DIDEACETYL-7-DEACETOXY-7-OXOKHIVORIN |                                      | C26H34O7        | 458.55668 |                                                                | p3 7-4  | 3   | 16.46 | 4 |
| 58 | TETRANDRINE                              | 518-34-3                             | C38H42N2O6      | 622.76824 | analgesic, antineoplastic, antihypertensive, lymphotoxin       | P9 1-7  | 1   | 9.68  | 4 |
| 59 | RUTILANTINONE                            | 21288-61-9                           | C22H20O9        | 428.3993  | coccidiostat                                                   | P9 2-6  | -3  | 8.36  | 4 |
| 60 | QUINIC ACID                              | 77-95-2                              | C7H12O6         | 192.17009 |                                                                | p7 6-8  | -6  | 12.67 | 4 |
| 61 | STIGMASTA-4,22-DIEN-3-ONE                | 20817-72-5                           | C29H46O         | 410.68937 |                                                                | p7 9-8  | -6  | 12.53 | 4 |
| 62 | OCTOPAMINE HYDROCHLORIDE                 | 104-14-3                             | C8H12ClNO2      | 189.64334 | adrenergic agonist                                             | P7 5-2  | -12 | 7.63  | 4 |
| 63 | TETRAHYDROGAMBOGIC ACID                  |                                      | C38H48O8        | 632.80146 |                                                                | P9 2-8  | -12 | 9.60  | 4 |
| 64 | ERYTHROMYCIN                             | 114-07-8                             | C37H67NO13      | 733.94544 | antibacterial                                                  | P6 2-8  | -13 | 10.97 | 4 |
| 65 | TACROLIMUS                               | 109581-93-3, 104987-11-3 [anhydrous] | C44H69NO12      | 804.04003 | immune suppressant, antifungal                                 | p10 3-7 | -14 | 21.93 | 4 |
| 66 | ABAMECTIN (avermectin B1a shown)         | 71751-41-2                           | C48H72O14       | 873.10064 | antiparasitic                                                  | P8 3-6  | -19 | 7.04  | 4 |
| 67 | GLUTATHIONE                              | 70-18-8                              | C10H17N3O6S     | 307.32749 | antioxidant                                                    | P9 5-8  | -20 | 17.40 | 4 |
| 68 | 3beta-HYDROXYDEOXODIHYDRODEOXYGEDUNIN    |                                      | C28H38O6        | 470.61146 |                                                                | p4 7-4  | -21 | 22.23 | 4 |
| 69 | RESVERATROL                              | 501-36-0                             | C14H12O3        | 228.24994 | antifungal, antibacterial                                      | P4 1-2  | -24 | 34.67 | 4 |
| 70 | NOBILETIN                                | 478-01-3                             | C21H22O8        | 402.40469 | matrix metalloproteinase inhibitor; antineoplastic             | P5 7-1  | -25 | 17.26 | 4 |
| 71 | QUERCETIN                                | 117-39-5, 6151-25-3(hydrate)         | C15H10O7        | 302.24275 | capillary protectant, antioxidant. antineoplastic, anti-HIV    | P7 7-4  | -27 | 15.75 | 4 |
| 72 | 3-HYDROXYFLAVONE                         | 577-85-5                             | C15H10O3        | 238.24515 |                                                                | p8 3-8  | -28 | 8.03  | 4 |
| 73 | SILIBININ                                | 22888-70-6                           | C25H22O10       | 482.44809 | hepatoprotective agent, antioxidant                            | P7 1-2  | -30 | 37.73 | 4 |

|    |                                             |                                        |               |           |                                             |         |      |       |   |
|----|---------------------------------------------|----------------------------------------|---------------|-----------|---------------------------------------------|---------|------|-------|---|
| 74 | HEXAMETHYLQUERCETAGETIN                     | 1251-84-9                              | C21H22O8      | 402.40469 |                                             | P3 1-7  | -42  | 13.24 | 4 |
| 75 | MUNDULONE                                   | 481-94-7                               | C26H26O6      | 434.49352 |                                             | p4 10-4 | -43  | 18.51 | 4 |
| 76 | CAPREOMYCIN SULFATE                         | 1405-37-4, 11003-38-6<br>[capreomycin] | C25H46N14O12S | 766.79597 | antibacterial, tuberculostatic              | P7 2-8  | -58  | 30.18 | 4 |
| 77 | HARMINE                                     | 442-51-3                               | C13H12N2O     | 212.25339 | antiparkinsonian, CNS stimulant             | p9 4-8  | -62  | 18.91 | 4 |
| 78 | DIHYDROCELASTROL                            |                                        | C29H40O4      | 452.63975 |                                             | P1 7-1  | -66  | 10.44 | 4 |
| 79 | CHRYSIN DIMETHYL ETHER                      | 21392-57-4                             | C17H14O4      | 282.29873 |                                             | P8 8-6  | -69  | 15.08 | 4 |
| 80 | ASARYLALDEHYDE                              | 4460-86-0                              | C10H12O4      | 196.20474 | fly attractant                              | P8 6-5  | -74  | 14.55 | 4 |
| 81 | DERRUSTONE                                  | 2204-59-3                              | C18H14O6      | 326.30868 |                                             | p7 6-7  | -77  | 35.57 | 4 |
| 82 | 5-HYDROXY-2',4',7,8-<br>TETRAMETHOXYFLAVONE | 123316-61-0                            | C19H18O7      | 358.35111 |                                             | P6 5-7  | -83  | 36.20 | 4 |
| 83 | CYCLOVERATRYLENE                            |                                        | C27H30O6      | 450.53655 |                                             | P8 1-5  | -85  | 51.07 | 4 |
| 84 | AVERMECTIN A1a                              |                                        | C49H74O14     | 887.12773 | antiparasitic                               | P5 1-7  | -85  | 35.38 | 4 |
| 85 | CRYPTOTANSHINONE                            | 35825-57-1                             | C19H20O3      | 296.36945 | inhibits angiogenesis                       | P4 2-8  | -85  | 9.62  | 4 |
| 86 | OBTUSAQUINONE                               | 21105-15-7                             | C16H14O3      | 254.28818 |                                             | p4 6-5  | -92  | 40.91 | 4 |
| 87 | LAPACHOL                                    | 84-79-7                                | C15H14O3      | 242.27703 | antineoplastic, antifungal                  | P8 8-8  | -98  | 8.34  | 4 |
| 88 | 4-NONYLPHENOL                               | 104-40-5                               | C15H24O       | 220.35793 | weevil pheromone, shows estrogenic activity | p9 9-8  | -181 | 41.78 | 4 |
